# Supplementary material for: Generic and disease-specific estimates of quality of life in macular degeneration: mapping the MacDQoL onto the EQ-5D-3L
Source: Springer Nature journal article supplement (doi:10.1007/s11136-015-1145-x), 2015-10-01
Supplement: MOESM1 [file 10682652]

**Generic and disease-specific estimates of quality of life in macular degeneration: Mapping the MacDQoL onto the EQ-5D-3L**

Padraig Dixon1*, Helen Dakin2, Sarah Wordsworth2,

1 School of Social and Community Medicine, University of Bristol, Canynge Hall, 39 Whatley Road, Bristol BS8, 2PS, United Kingdom

2 Health Economics Research Centre, Nuffield Department of Population Health, University of Oxford, Old Road Campus, Oxford, OX3 7LF United Kingdom

* Corresponding author

Email: [padraig.dixon@bristol.ac.uk](mailto:padraig.dixon@bristol.ac.uk)

**Journal**: Quality of Life Research

Supplementary Material 1

Further detail on the MacDQoL instrument

The MacDQoL is a macular-degeneration specific HRQoL measure. Its development was particularly influenced by a previous body of research [[1](#_ENREF_1)] that sought to incorporate patients’ views of the importance of domains of life to their quality of life. The MacDQoL consists of two general overview questions and 23 specific questions or domains. The two general items (DQOL-I and DQOL-II) are scored individually and measure generic present quality-of-life (DQOL-I), and MD[[1]](#footnote-2)-specific quality-of-life (DQOL-II). [[2](#_ENREF_2)]

Table A1 DQOL-I and DQOL-II questions and ranges

| Question number | Question structure and possible responses |
| --- | --- |
| ‘DQOL-I’ | In general, my present quality of life is: |
|  | Excellent (Assigned score: 3) |
|  | Very good (Assigned score: 2) |
|  | Good (Assigned score: 1) |
|  | Neither good nor bad (Assigned score: 0) |
|  | Bad (Assigned score: -1) |
|  | Very bad (Assigned score: -2) |
|  | Extremely bad (Assigned score: -3) |
| ‘DQOL-II’ | If I did not have MD, my quality of life would be |
|  | Very much better (Assigned score: -3) |
|  | Much better (Assigned score: -2) |
|  | A little better (Assigned score: -1) |
|  | The same (Assigned score: 0) |
|  | Worse(Assigned score: 1) |

The 23 specific domains[[2]](#footnote-3) are summarised in A2.

Table A2 Possible responses and ranges of the 23 MacDQoL domains

| Question number | Domain | Possible responses |
| --- | --- | --- |
| All items begin with the phrase: “If I did not have MD…” | | |
| 1 | I could handle my household tasks | Very much better[-3]-worse[1] |
| 2 | I could handle my personal affairs | Very much better[-3]-worse[1] |
| 3 | My experience of shopping would be | Very much better[-3]-worse[1] |
| 4 | *My working life and work-related opportunities would be | Very much better[-3]-worse[1] |
| 5 | *My closest personal relationship would be | Very much better[-3]-worse[1] |
| 6 | *My family life would be | Very much better[-3]-worse[1] |
| 7 | My friendships and social life would be | Very much better[-3]-worse[1] |
| 8 | My physical appearance (including clothes and grooming) would be | Very much better[-3]-worse[1] |
| 9 | Physically I could do | Very much more [-3]-less [1] |
| 10 | I could get out and about (e.g. on foot, or by car, bus or train | Very much better[-3]-worse[1] |
| 11 | *My holidays would be | Very much better[-3]-worse[1] |
| 12 | I could enjoy my leisure activities and interests (e.g. by reading, TV, radio, hobbies) | Very much better[-3]-worse[1] |
| 13 | My self-confidence would be | Very much better[-3]-worse[1] |
| 14 | My motivation to achieve things | Very much better[-3]-worse[1] |
| 15 | The way people in general react to me would be | Very much better[-3]-worse[1] |
| 16 | My feelings about the future would be | Very much better[-3]-worse[1] |
| 17 | My financial situation would be | Very much better[-3]-worse[1] |
| 18 | I could do things independently | Very much more[-3]-less [1] |
| 19 | I could do things for others as I wish | Very much better[-3]-worse[1] |
| 20 | I would have mishaps or would lose things | Very much less [-3]-more [1] |
| 21 | I could enjoy meals | Very much more[-3]-less [1] |
| 22 | The time it takes me to do things would be | Very much less[-3]-more [1] |
| 23 | I could enjoy nature | Very much more [-3]-less [1] |

*: Domains 4, 5, 6, and 11 have a not applicable response. This issue is discussed in the main text and below.

An important feature of the instrument is that each domain contains ‘impact’ question and an ‘importance’ question, an example of which is in Table A3.

Table A3 Example of impact and important structure in a specific domain

| Question number | Question structure and possible responses |
| --- | --- |
| 7a (‘Impact’) | If I did not have MD, my friendships and social life would be: |
|  | Very much better |
|  | Much better |
|  | A little better |
|  | The same |
|  | Worse |
| 7b (‘Importance’) | My friendships and social life are: |
|  | Very important |
|  | Important |
|  | Somewhat important |
|  | Not at all important |

The use of an importance-weighted impact allows for an overall weighted impact to be calculated as per the discussion in the main paper.

Recoding due to ‘Not applicable’ responses in the MacDQoL instrument

Four domains of the MacDQoL instrument allowed people to tick ‘Not applicable’ (or similar) response instead of answering the impact/importance questions: work; personal relationships; family life; and holidays. Since 85% of patients who answered the MacDQoL had missing data on these items, including these questions in regression models without recoding would have reduced sample sizes, hindered model convergence and caused the number of observations to differ substantially between models with these variables and models without, making comparison between specifications problematic. One possible approach is to exclude all of the variables with ‘N/A’ responses from the analysis. A second approach is to recode N/A responses to a neutral impact, such that the item of interest is considered to be not at all important or (equivalently) to be the same as it would have been without macular degeneration: e.g. for someone who is already retired, work is either considered to be unimportant or (equivalently) macular degeneration is considered to have had no impact.[[3]](#footnote-4) Both of these approaches were explored in different specifications and their predictive performance compared. The results showed that the recoding produced lower MSE and was therefore used in analysis. Moreover, the recoding is consistent with the natural interpretation of these responses as not being missing, but as reflecting ‘no impact’ on quality of life of a particular domain.

Timing of data collection

The MacDQoL instrument was administered on average 55 days after the EQ-5D, 41 days later than required by trial protocol. Only observations that included MacDQoL instruments no more than 90 days after EQ-5D was due to be administered, and no more than one day after this date, were used in the analysis in order to ensure consistency between the EQ-5D and MacDQoL measures. Ninety days roughly corresponds to the 3-month period between baseline and the second point at which the EQ-5D survey was administered. Nevertheless, the cut-off period is somewhat arbitrary, so sensitivity analysis was used to check if the main results would be changed by varying this assumption.

The first sensitivity analysis assessed if a ‘days between collection’ variable entered in the optimal specification with P<0.05, and if this variable led to changes in the covariates of other variables. Neither effect was observed, although its inclusion did slightly lower the MSE of this model. The second sensitivity analysis assessed the effects of a stricter cut off point of 30 days, rather than the 90 days used in the main analysis. Imposing a stricter cut off point of 30 days did not change the recommendation of the optimal model, but did affect sample sizes and the stability of parameter estimates for some specifications.

Prediction at extremes of the EQ-5D distribution

A comparison of the histograms of the original and predicted utility values from the two-part model described in Table 3 of the main text show that extreme values are poorly predicted.

Fig. 2 Comparison of actual and predicted EQ-5D scores

This weakness of the prediction algorithm at the extremes of the distribution is also apparent in a QQ plot (Figure 2) and in a comparison of predicted versus fitted values (Figure 3), both of which pertain to the two-part model described in Table 3 in the main text.

Fig. 3 QQ plot

Fig. 4 Predicted versus fitted EQ-5D

MSE prediction errors are largest for those individuals with the lowest EQ-5D score, confirming that the prediction weaknesses of the algorithm particularly manifest at the lower end of the distribution, while its (relative) success at predicting mean values are also evident.

Variance-covariance matrix

The variance-covariance matrices for the regressions presented in the paper are available in online Supplementary Material 2.

MSE of selected stable specifications

A number of specifications were tested using combinations of variables from MacDQoL. Table A4 lists MSE for a select number of stable, convergent, non-collinear models. CLAD models did not converge in likelihood except in a few instances. These models were estimated on the full sample and on the estimation sample.

The models are numbered from 1 through to 88, reflecting 4 estimators applied to each of 22 model specifications. In each case, the OLS is the first model, CLAD the second, Tobit the third and two-part models the fourth. For example, in the table, model 5 would be an OLS model, while model 12 would be a two-part model.

Table A4 MSE from stable EQ-5D mapping specifications estimated on the full sample and on the estimation sample

| Model specification estimated with OLS, CLAD, Tobit and two-part models | Number and nature of impact variables included | Number and nature of weighted impact variables included | Number and nature of MD-specific general quality of life variables included | Average weighted impact variable includeda | MSE estimated on full sample | MSE estimated on estimation sample |
| --- | --- | --- | --- | --- | --- | --- |
| **Models 1 to 4.** | 23 dummy variables  Recoded to 3 categories.  N/A responses to recoded to 0. | 23 continuous variables. | DQOL-I included only in second part of two-part model as a continuous variable | None | **OLS**: 0.0310  **CLAD**: Did not converge  **Tobit**: 0.0311  **Two-part**: 0.0293 | **OLS**: 0.0286  **CLAD**: Did not converge  **Tobit**: 0.0270  **Two-part**: 0.0256 |
| **Models 5 to 8.** | 23 dummy variables  Recoded to 3 categories.  N/A responses to recoded to 0. | 23 continuous variables. | None | None | **OLS**: 0.0310  **CLAD**: Did not converge  **Tobit**: 0.0311  **Two-part**: 0.0307 | **OLS**: 0.0273  **CLAD**: Did not converge  **Tobit**: 0.0700  **Two-part**: 0.0268 |
| **Models 9 to 12.** | 19 dummy variables i.e. excluding the 4 N/A variables  Recoded to 3 categories. | 19 dummy variables i.e. excluding the 4 N/A variables | None | None | **OLS**: 0.0326  **CLAD**: Did not converge  **Tobit**: 0.0328  **Two-part**: 0.0323 | **OLS**: 0.0293  **CLAD**: Did not converge  **Tobit**: 0.0294  **Two-part**: 0.0290 |
| **Models 13 to 16.** | 19 dummy variables i.e. excluding the 4 N/A variables  Recoded to 3 categories. | None | None | None | **OLS**: 0.0340  **CLAD**: Did not converge  **Tobit**: 0.0344  **Two-part**: 0.0337 | **OLS**: 0.0323  **CLAD**: Did not converge  **Tobit**: 0.0327  **Two-part**: 0.0322 |
| **Models 17 to 20.** | 19 continuous variables i.e. excluding the 4 N/A variables  No recoding. | 19 continuous variables i.e. excluding the 4 N/A variables | None | None | **OLS**: 0.0335  **CLAD**: Did not converge  **Tobit**: 0.0334  **Two-part**: 0.0333 | **OLS**: 0.0309  **CLAD**: Did not converge  **Tobit**: 0.0308  **Two-part**: 0.0354 |
| **Models 21 to 24.** | 19 continuous variables i.e. excluding the 4 N/A variables  No recoding. | None | None | None | **OLS**: 0.0343  **CLAD**: Did not converge  **Tobit**: 0.0342  **Two-part**: 0.0341 | **OLS**: 0.0331  **CLAD**: Did not converge  **Tobit**: 0.0332  **Two-part**: 0.0310 |
| **Models 25 to 28.** | None | None | None | Included | **OLS**: 0.0373  **CLAD**: 0.0451  **Tobit**: 0.0374  **Two-part**: 0.0373 | **OLS**: 0.0354  **CLAD**: Did not converge  **Tobit**: 0.0355  **Two-part**: 0.0354 |

a: This variable is continuous, and does not have any interpretation as a categorical variable, unlike the other regressors. Hence, if included, it is always included as a continuous variable.

The following table describes all models not otherwise present in Table A4. All models were estimated with OLS, CLAD, Tobit and two-part models with EQ-5D-3L values as the dependent variable. MSE information is not presented for these models as they did not provide stable estimates of predictions or model performance. The main econometric issue that arose under some or all estimators is also listed.

Table A5 All other models estimated

| Model specification estimated with OLS, CLAD, Tobit and two-part models | Number and nature of impact variables included | Number and nature of weighted impact variables included | Number and nature of MD-specific general quality of life variables included | Average weighted impact variable includeda | Main econometric issue |
| --- | --- | --- | --- | --- | --- |
| **Models 29 to 32.** | 23 dummy variables  Recoded to 3 categories.  N/A responses to recoded to 0. | 23 continuous variables. | DQOL-I and DQOL-II, included as dummy variables | Included | Perfect collinearity in some variables |
| **Models 33 to 36.** | 23 dummy variables  Recoded to 3 categories  N/A responses recoded to 0. | 23 continuous variables. | DQOL-II as a dummy variable. | Included | Perfect collinearity in some variables |
| **Models 37 to 40.** | 23 dummy variables  Recoded to 3 categories  N/A responses recoded to 0. | 23 continuous variables. | DQOL-I as a dummy variable. | Included | Perfect collinearity in some variables |
| **Models 41 to 44.** | 23 dummy variables  Recoded to 3 categories  N/A responses recoded to 0. | 23 continuous variables. | None. | Included | Perfect collinearity in some variables |
| **Models 45 to 48.** | 23 dummy variables  Recoded to 3 categories  N/A responses recoded to 0. | 23 continuous variables. | DQOL-I and DQOL-II, included as dummy variables. | None. | Perfect collinearity in some variables |
| **Models 49 to 52.** | 23 dummy variables  Recoded to 3 categories  N/A responses recoded to 0. | 23 continuous variables. | DQOL-II included as a dummy variable. | None. | Perfect collinearity in some variables |
| **Models 53 to 56.** | 23 dummy variables  Recoded to 3 categories  N/A responses recoded to 0. | 23 continuous variables. | DQOL-I included as a dummy variable. | None. | Perfect collinearity in some variables |
| **Models 57 to 60.** | 23 dummy variables.  Recoded to 3 categories  N/A responses recoded to 0. | None | None | None | Perfect collinearity in some variables |
| **Models 61 to 64.** | 19 dummy variables i.e. excluding the 4 N/A variables  No recoding | 19 dummy variables i.e. excluding the 4 N/A | None | None | Perfect collinearity in some variables |
| **Models 65 to 68.** | 20 continuous variables i.e. excluding 3 of the 4 N/A variables but including the variable measuring impact on work  No recoding | 20 continuous variables i.e. excluding 3 of the 4 N/A variables but including the variable measuring impact on work | None | None | Small number of observations – these were dropped automatically in regression analyses because of the variable measuring impact on work, which was not imputed for this specification |
| **Models 69 to 72.** | 20 continuous variables i.e. excluding 3 of the 4 N/A variables but including the variable measuring impact on work  No recoding | 20 continuous variables i.e. excluding 3 of the 4 N/A variables but including the variable measuring impact on work | None | None | Small number of observations – these were dropped automatically in regression analyses because of the variable measuring impact on work, which was not imputed for this specification |
| **Models 73 to 76.** | 19 continuous variables i.e. excluding the 4 N/A variables  No recoding | 19 dummy variables i.e. excluding the 4 N/A variables | None | None | Perfect collinearity in some variables |
| **Models 77 to 80.** | 19 dummy variables i.e. excluding the 4 N/A variables  No recoding | 19 dummy variables i.e. excluding the 4 N/A variables | None | None | Perfect collinearity in some variables |
| **Models 81 to 84.** | 19 dummy variables i.e. excluding the 4 N/A variables  No recoding | None | None | None | Perfect collinearity in some variables |
| **Model 85 to 88.** | None | None | DQOL-I and DQOL-II as dummy variables | Included | Perfect collinearity in some variables |

a: This variable is continuous, and does not have any interpretation as a categorical variable, unlike the other regressors. Hence, if included, it is always included as a continuous variable.

References

1. Mitchell, J., & Bradley, C. (2004). Design of an individualised measure of the impact of macular disease on quality of life (the MacDQoL). Quality of Life Research, 13(6), 1163-1175.

2. Mitchell, J., Wolffsohn, J., Woodcock, A., Anderson, S., McMillan, C., Rubinstein, M., Amoaku, W., & Bradley, C. (2005). + Psychometric evaluation of the MacDQoL individualised measure of the impact of macular degeneration on quality of life. Health and quality of life outcomes, 3(1), 25.

1. The MacDQoL uses the MD abbreviation when referring to macular degeneration, rather than nAMD or AMD. [↑](#footnote-ref-2)
2. A 24th question asks ‘Does MD affect your quality of life in any ways that have not been covered by the questionnaire. If a ‘yes’ is provided, an open text response may be provided. [↑](#footnote-ref-3)
3. This reflects the MacDQoL scoring system, which attaches a zero weight to domains regarded as unimportant by patients. [↑](#footnote-ref-4)
