# Supplementary material for: Generic and disease-specific estimates of quality of life in macular degeneration: mapping the MacDQoL onto the EQ-5D-3L
Source: Springer Nature journal article supplement (doi:10.1007/s11136-015-1145-x), 2015-10-01
Supplement: MOESM2 [file 10682652]

## Sheet: 2part
		perfecthealth	perfecthealth	perfecthealth	perfecthealth	perfecthealth	perfecthealth	perfecthealth	perfecthealth	perfecthealth	perfecthealth	perfecthealth	perfecthealth	perfecthealth	perfecthealth	perfecthealth	perfecthealth	perfecthealth	perfecthealth	perfecthealth	perfecthealth	perfecthealth	perfecthealth	perfecthealth	perfecthealth	perfecthealth	perfecthealth	perfecthealth	perfecthealth	perfecthealth	perfecthealth	perfecthealth	perfecthealth	perfecthealth	perfecthealth	perfecthealth	perfecthealth	perfecthealth	perfecthealth	perfecthealth	perfecthealth	perfecthealth	perfecthealth	perfecthealth	perfecthealth	perfecthealth	perfecthealth	perfecthealth	perfecthealth
		_Idqol1a_2	_Idqol1a_3	_Idqol2a_2	_Idqol2a_3	_Idqol3a_2	_Idqol3a_3	_Idqol4a_2	_Idqol4a_3	_Idqol5a_2	_Idqol5a_3	_Idqol6a_2	_Idqol6a_3	_Idqol7a_2	_Idqol7a_3	_Idqol8a_2	_Idqol8a_3	_Idqol9a_2	_Idqol9a_3	_Idqol10a_2	_Idqol10a_3	_Idqol11a_2	_Idqol11a_3	_Idqol12a_2	_Idqol12a_3	_Idqol13a_2	_Idqol13a_3	_Idqol14a_2	_Idqol14a_3	_Idqol15a_2	_Idqol15a_3	_Idqol16a_2	_Idqol16a_3	_Idqol17a_2	_Idqol17a_3	_Idqol18a_2	_Idqol18a_3	_Idqol19a_2	_Idqol19a_3	_Idqol20a_2	_Idqol20a_3	_Idqol21a_2	_Idqol21a_3	_Idqol22a_2	_Idqol22a_3	_Idqol23a_2	_Idqol23a_3	dqolwi1	dqolwi2
perfecthealth	_Idqol1a_2	0.0976648	0.103777	-0.0161148	-0.0149203	-0.0162556	-0.015271	0.017818	0.0215625	0.0133132	0.044047	0.000597536	-0.00599274	0.00564754	0.0148689	-0.00899761	-0.00612521	-0.00781126	-0.0155109	-0.00412751	-0.0256634	-0.00291354	-0.00562016	-0.00185693	0.000109626	-0.00198082	0.0100391	-0.00299182	-0.00589579	-0.000608414	-0.00285036	0.0124149	0.0142898	0.00357122	-0.00472882	-0.00255407	0.00209661	-0.00918411	-0.00395396	-0.0147248	-0.0115291	-0.0101251	0.00805948	-0.00593602	-0.011238	-0.0113713	-0.0104277	0.0152613	-0.00305311
perfecthealth	_Idqol1a_3	0.103777	0.244682	-0.0206235	-0.0435951	-0.0138964	-0.0472857	-0.0128291	-0.0175437	0.0277657	0.0982033	-0.0280329	-0.074523	-0.000620134	0.0021143	-0.0263342	-0.0539898	-0.00235775	-0.0188724	-0.00375522	-0.0115005	0.000129777	-0.0281223	0.00101315	0.00130988	0.00506951	0.0232363	0.00398859	-0.000731943	-0.00635053	0.00479811	0.0108965	0.0254427	-0.017132	-0.0431931	-0.000973431	0.0135961	-0.00413984	-0.0136991	-0.0153792	-0.0307041	-0.0138813	0.0295445	-0.0136371	-0.0231191	-0.00959829	0.000684578	0.0323484	-0.00814613
perfecthealth	_Idqol2a_2	-0.0161148	-0.0206235	0.0953467	0.107572	-0.00710984	0.00302804	-0.0240755	0.00867477	0.00139113	-0.0070416	0.00595162	0.00383338	-0.0112447	-0.0209095	0.00562566	-0.000839343	-0.0164803	-0.0203231	-0.0052556	0.00686566	0.00144879	0.0122334	-0.00331082	-0.00633262	-0.0108905	-0.0288713	0.00357425	0.00612952	0.00792728	-0.00908443	-0.0063311	-0.00769462	-0.0305239	-0.0723943	-0.00342267	-0.00214313	-0.00213824	-0.01097	0.00366435	-0.00528352	-0.0129688	-0.00993574	0.01057	0.0157133	-0.00272104	-0.00172593	-0.00292173	0.0121861
perfecthealth	_Idqol2a_3	-0.0149203	-0.0435951	0.107572	0.273672	-0.0086211	-0.00689924	0.0251098	0.0460141	-0.0104856	-0.0655451	0.019899	-0.0131817	-0.0130605	-0.028104	-0.00654641	-0.0185574	-0.0210666	-0.0334085	-0.010306	0.00154669	0.0105907	0.0492221	-0.00992916	-0.0225792	-0.00807524	-0.0415966	-0.0118843	-0.00650081	0.0269141	0.0199062	0.00252719	-0.0108287	-0.0804666	-0.231506	-0.000812244	-0.00922241	-0.00948314	-0.0295244	-0.0019499	-0.0341938	-0.0248576	-0.00218445	0.0109958	0.0344597	0.00228246	0.00737915	-0.00425564	0.0331337
perfecthealth	_Idqol3a_2	-0.0162556	-0.0138964	-0.00710984	-0.0086211	0.0815259	0.0809458	-0.00311014	-0.01917	-0.0171987	-0.00863867	-0.0173183	-0.0269078	0.00616581	0.00948626	0.00127106	-0.0150538	-0.00453778	0.00319581	-0.00429305	-0.00731322	-0.00567024	-0.00982815	-0.0183202	-0.013967	-0.0042578	-0.0155675	0.00766784	-0.00174574	-0.00852155	-0.0159986	-0.00853925	-0.0132973	0.0135522	0.0399094	-0.00414375	-0.00115256	0.00215902	0.00826402	0.00519028	0.000553112	0.00500248	0.00304875	-0.00601897	-0.000184757	-0.0140482	-0.0177762	-0.00125072	0.000105382
perfecthealth	_Idqol3a_3	-0.015271	-0.0472857	0.00302804	-0.00689924	0.0809458	0.209401	-0.025585	-0.083081	-0.0309447	-0.0527112	0.00163044	0.0122077	0.00304664	-0.0210205	-0.00378865	-0.0479138	-0.0145393	-0.0231582	-0.0205453	-0.0374763	-0.00632405	-0.00703998	-0.0164633	-0.0238901	-0.00831571	-0.0179882	0.00230418	0.00382768	-0.00801425	-0.0322986	-0.0104108	-0.0208468	0.0169791	0.0487083	0.0130706	0.0236466	-0.0154369	-0.0110683	0.00871993	-0.0076503	-0.00578966	0.0209304	-0.000132784	-0.00282747	-0.00938914	-0.033801	-0.00388871	0.00137526
perfecthealth	_Idqol4a_2	0.017818	-0.0128291	-0.0240755	0.0251098	-0.00311014	-0.025585	0.578713	0.810452	0.0440573	0.0369556	-0.010929	-0.0197116	-0.0207563	-0.0417706	-0.0566794	-0.00127941	0.00492212	0.0266122	-0.00512091	-0.0509673	0.00952227	0.0343036	-0.00557928	-0.00393392	-0.00160863	0.0180412	-0.00632603	-0.0249449	0.00111866	0.0558254	0.00409329	-0.0149475	0.0608727	0.048298	-0.0215981	-0.0620563	-0.00498267	0.0149574	0.00778223	0.0360067	0.0310981	0.0156405	-0.0163949	-0.0384364	0.0139741	0.0206247	-0.00370601	0.00382183
perfecthealth	_Idqol4a_3	0.0215625	-0.0175437	0.00867477	0.0460141	-0.01917	-0.083081	0.810452	1.8658	0.0663248	0.184344	-0.0282227	-0.0321559	-0.0410968	-0.048473	-0.105504	-0.0803649	-0.00497775	-0.00698289	-0.0342527	-0.0969724	-0.00333625	0.0331258	-0.00818348	-0.00259793	-0.00996358	0.0066052	0.012525	-0.0163428	-0.0184877	0.0763615	0.0249877	0.0137583	0.151315	0.182422	-0.0379028	-0.0868593	0.0222626	0.0358028	0.0090196	0.0582576	0.0454812	-0.0266159	-0.0313654	-0.0691206	0.0553434	0.092128	-0.00530302	0.0101175
perfecthealth	_Idqol5a_2	0.0133132	0.0277657	0.00139113	-0.0104856	-0.0171987	-0.0309447	0.0440573	0.0663248	0.344046	0.430684	-0.000485731	-0.00931404	-0.0176392	-0.0527907	-0.034792	-5.43364e-05	-0.00325213	-0.0313589	-0.0195477	-0.0281269	-0.00267741	-0.00900022	-0.0132268	-0.0221629	0.00714273	0.0228119	-0.0146577	0.0331331	0.0296349	0.0539541	0.00442717	0.0125979	-0.0264683	-0.0776093	-0.00463287	-0.020682	-0.00334722	0.00449372	-3.25564e-05	-0.0166974	-0.00315601	0.00539652	-0.00328506	-0.013285	0.00914175	0.00632841	0.00483668	-0.00123203
perfecthealth	_Idqol5a_3	0.044047	0.0982033	-0.0070416	-0.0655451	-0.00863867	-0.0527112	0.0369556	0.184344	0.430684	1.02877	-0.00236547	-0.043205	-0.0153951	-0.0844645	-0.0575133	-0.0239957	-0.0129141	-0.0821476	-0.028287	-0.0829933	-0.0121215	-0.0674629	-0.0277496	-0.0434978	0.0147158	0.0692342	-0.0283781	0.0160725	0.0421202	0.118916	0.0106805	0.0250015	0.0404779	0.0249541	-0.00775585	-0.0267812	-0.0046154	-0.00582246	-0.00848123	-0.0268471	-0.00926465	0.00508501	-0.00518945	-0.0179472	0.0228646	0.0108013	0.0166283	-0.00890071
perfecthealth	_Idqol6a_2	0.000597536	-0.0280329	0.00595162	0.019899	-0.0173183	0.00163044	-0.010929	-0.0282227	-0.000485731	-0.00236547	0.189852	0.270323	-0.0211951	-0.0698388	0.00239121	0.020349	-0.0142122	-0.0229134	0.00774598	0.00477022	0.00447478	0.0411268	0.00329025	0.0156097	-0.00706178	-0.00834472	-0.0109565	0.00601675	-0.0082539	-0.00974156	-0.000598761	0.00175708	-0.00778761	-0.0567466	0.00464677	-0.00310682	-0.02259	-0.0268784	-0.00916678	-5.25048e-05	0.00648258	0.0112131	0.000979137	0.00601312	-0.00297064	0.0113658	-0.00460837	0.00360908
perfecthealth	_Idqol6a_3	-0.00599274	-0.074523	0.00383338	-0.0131817	-0.0269078	0.0122077	-0.0197116	-0.0321559	-0.00931404	-0.043205	0.270323	0.636682	-0.0287157	-0.103989	0.00665271	0.00581419	-0.0119868	-0.0289611	0.0153157	0.0319704	0.0126369	0.0386074	0.0233404	0.0384793	-0.00250529	0.000836709	-0.0264881	-0.00927932	-0.0104085	-0.0122071	-0.00689497	-0.00264317	0.026136	-0.0195259	0.000580139	0.0142933	-0.0258348	-0.0377561	-0.0218603	0.00718265	0.0113138	0.0101999	0.00811108	0.0020349	-0.000221802	-0.0043579	-0.0105958	0.000350089
perfecthealth	_Idqol7a_2	0.00564754	-0.000620134	-0.0112447	-0.0130605	0.00616581	0.00304664	-0.0207563	-0.0410968	-0.0176392	-0.0153951	-0.0211951	-0.0287157	0.119708	0.158119	-0.00484348	-0.0052611	-0.00372348	-0.0218568	-0.00999982	-0.000117412	-0.0165945	-0.0306026	-0.00627621	-0.00243898	0.00333733	0.0186272	-0.00367725	-0.00571886	-0.015115	-0.0414471	-0.00173288	-0.00899358	6.3425e-05	0.0714412	-0.00683506	0.00192103	-0.00543019	0.0118296	-0.00695709	-0.0153898	0.00694557	-0.0122119	0.00226714	-0.00440164	-0.0130136	-0.0111745	-5.32402e-05	-0.00185615
perfecthealth	_Idqol7a_3	0.0148689	0.0021143	-0.0209095	-0.028104	0.00948626	-0.0210205	-0.0417706	-0.048473	-0.0527907	-0.0844645	-0.0698388	-0.103989	0.158119	0.437417	-0.00581143	-0.0771492	-0.00869859	-0.0351567	0.00759243	0.0277987	-0.023448	-0.0771826	-0.0102029	0.00596763	0.0222253	0.0265207	-0.0053637	-0.0229731	-0.0297276	-0.0821273	0.00253882	-0.0120713	0.0238901	0.220077	-0.0145998	-0.0215548	0.00877558	0.053638	-0.000850218	-0.00214373	0.00505158	-0.0931602	0.00377378	-0.0236036	-0.0215192	-0.0203005	0.000575308	-0.00255693
perfecthealth	_Idqol8a_2	-0.00899761	-0.0263342	0.00562566	-0.00654641	0.00127106	-0.00378865	-0.0566794	-0.105504	-0.034792	-0.0575133	0.00239121	0.00665271	-0.00484348	-0.00581143	0.162741	0.223612	-0.0159137	-0.00137267	-0.0169356	-0.0101933	0.00240221	0.0218736	0.0144179	0.00441106	-0.00638846	-0.00935269	-0.00380937	-0.00379197	-0.00397337	-0.0122008	-0.0135738	-0.0132095	-0.0204686	-0.0173966	0.00964612	0.0132965	-0.00414956	-0.0218405	0.00130426	0.0103907	-0.00393683	-0.0306506	-0.000962009	-0.00779197	-0.00404842	0.00102071	-0.00428613	0.00082047
perfecthealth	_Idqol8a_3	-0.00612521	-0.0539898	-0.000839343	-0.0185574	-0.0150538	-0.0479138	-0.00127941	-0.0803649	-5.43364e-05	-0.0239957	0.020349	0.00581419	-0.0052611	-0.0771492	0.223612	0.711332	-0.00330638	0.056971	-0.0219572	-0.0638481	0.0151273	0.0788629	0.0250566	0.0164317	-0.00558428	0.0119587	-0.00123082	-0.0202482	-0.0262591	-0.0893506	-0.025672	-0.0498857	-0.00609147	-0.061795	-0.007184	-0.0395109	-0.00332844	-0.00323958	0.0118057	0.0666917	0.0141025	-0.0125388	-0.00420032	-0.0332745	-0.0182372	0.010549	-0.00437084	-0.00290154
perfecthealth	_Idqol9a_2	-0.00781126	-0.00235775	-0.0164803	-0.0210666	-0.00453778	-0.0145393	0.00492212	-0.00497775	-0.00325213	-0.0129141	-0.0142122	-0.0119868	-0.00372348	-0.00869859	-0.0159137	-0.00330638	0.112116	0.139805	0.00699267	0.0124798	-0.0144457	-0.0182859	-0.00966576	-0.0152756	0.00215419	0.000443185	-0.00110303	-0.0109538	-0.0115373	-0.00414225	-0.00448345	-0.00759638	0.015719	-0.00865804	-0.0223308	-0.0305691	0.00649184	0.0176017	-0.013262	-0.0215074	0.000713896	0.0228653	-0.000423258	0.00515524	-0.00837661	-0.00474836	0.00107624	-0.00296713
perfecthealth	_Idqol9a_3	-0.0155109	-0.0188724	-0.0203231	-0.0334085	0.00319581	-0.0231582	0.0266122	-0.00698289	-0.0313589	-0.0821476	-0.0229134	-0.0289611	-0.0218568	-0.0351567	-0.00137267	0.056971	0.139805	0.307989	0.0215518	0.022187	-0.0143783	0.00735379	-0.00950241	-0.0251376	-0.0102538	-0.0282936	0.00169459	-0.0365039	-0.0131078	-0.00671039	-0.0121128	-0.0270352	0.0134967	-0.0310839	-0.0281761	-0.0663327	0.0231481	0.0329904	-0.0193842	-0.0296939	0.00340326	0.00946564	0.00724782	0.0297492	-0.00952209	-0.0278667	-0.000777751	-0.00612866
perfecthealth	_Idqol10a_2	-0.00412751	-0.00375522	-0.0052556	-0.010306	-0.00429305	-0.0205453	-0.00512091	-0.0342527	-0.0195477	-0.028287	0.00774598	0.0153157	-0.00999982	0.00759243	-0.0169356	-0.0219572	0.00699267	0.0215518	0.104773	0.11216	-0.0104032	0.000893657	-0.0120029	-0.00490585	-0.00236545	-0.00740822	-0.00720876	-0.0233786	-0.0276628	-0.026064	-0.00138961	-0.00775169	0.030709	0.0794409	-0.0141337	-0.0289323	0.00204101	0.0175075	-0.00532638	-0.00128957	0.00958624	-0.00627005	0.00783994	0.0233169	-0.00665129	-0.0120278	-0.000851171	-0.000519633
perfecthealth	_Idqol10a_3	-0.0256634	-0.0115005	0.00686566	0.00154669	-0.00731322	-0.0374763	-0.0509673	-0.0969724	-0.0281269	-0.0829933	0.00477022	0.0319704	-0.000117412	0.0277987	-0.0101933	-0.0638481	0.0124798	0.022187	0.11216	0.276587	-0.00787523	-0.0197774	-0.0082029	-0.017851	-0.00299309	-0.0335017	-0.010234	-0.0189526	-0.0306684	-0.0639836	-0.00576387	-0.00918692	0.0255642	0.0978135	-0.0219555	-0.0220232	0.0114082	0.0160484	-0.00616501	-0.0163698	0.00290694	-0.0302609	0.0186322	0.0511833	-0.0157745	-0.0202783	-0.00537205	0.00242585
perfecthealth	_Idqol11a_2	-0.00291354	0.000129777	0.00144879	0.0105907	-0.00567024	-0.00632405	0.00952227	-0.00333625	-0.00267741	-0.0121215	0.00447478	0.0126369	-0.0165945	-0.023448	0.00240221	0.0151273	-0.0144457	-0.0143783	-0.0104032	-0.00787523	0.0892892	0.0730851	0.00989877	0.00992514	-0.000262807	-0.00824231	-0.00834319	-0.0178294	0.0167509	0.0155187	-0.00709028	-0.00637145	-0.0179494	-0.0383779	0.00417882	0.00603095	-0.0121682	-0.0132842	-0.00501515	0.00731919	-0.00317766	-0.00342023	-0.00845897	-0.0166356	-0.00561143	-0.00684041	-0.000353646	0.00201942
perfecthealth	_Idqol11a_3	-0.00562016	-0.0281223	0.0122334	0.0492221	-0.00982815	-0.00703998	0.0343036	0.0331258	-0.00900022	-0.0674629	0.0411268	0.0386074	-0.0306026	-0.0771826	0.0218736	0.0788629	-0.0182859	0.00735379	0.000893657	-0.0197774	0.0730851	0.22647	-0.000856515	-0.00686806	0.00527827	-0.0142912	-0.0167296	-0.0375387	0.00140567	0.0247166	-0.00846539	-0.0321954	-0.00969509	-0.0262716	0.0134334	-0.00495354	-0.00844686	-0.0129872	0.00334539	0.00491511	0.000218228	-0.017093	-0.0091607	0.0021358	-0.00680648	-0.0188388	-0.00339261	0.00751038
perfecthealth	_Idqol12a_2	-0.00185693	0.00101315	-0.00331082	-0.00992916	-0.0183202	-0.0164633	-0.00557928	-0.00818348	-0.0132268	-0.0277496	0.00329025	0.0233404	-0.00627621	-0.0102029	0.0144179	0.0250566	-0.00966576	-0.00950241	-0.0120029	-0.0082029	0.00989877	-0.000856515	0.0854085	0.0849764	4.3449e-05	0.00349779	0.00159031	0.0103276	0.00387188	-0.00595037	-0.00872039	-0.0101875	-0.0124666	-0.0330093	-0.0127913	-0.00816469	-0.00301585	0.000240888	0.00381109	0.0144677	-0.0127805	-0.0132725	-0.0048517	-0.0159827	-0.00536358	-0.00289643	-0.000202516	-0.00158728
perfecthealth	_Idqol12a_3	0.000109626	0.00130988	-0.00633262	-0.0225792	-0.013967	-0.0238901	-0.00393392	-0.00259793	-0.0221629	-0.0434978	0.0156097	0.0384793	-0.00243898	0.00596763	0.00441106	0.0164317	-0.0152756	-0.0251376	-0.00490585	-0.017851	0.00992514	-0.00686806	0.0849764	0.180029	-0.00101146	0.000339993	0.0118436	0.00945672	-0.0157542	-0.0412492	0.000626376	-0.00589301	-0.0173374	-0.0394299	-0.0250631	-0.0229752	-0.0046191	0.00229969	-0.00282901	0.0135223	-0.0034297	-0.00744308	-0.00706722	-0.0311842	-0.0185076	-0.00440629	-0.000958767	-0.00375808
perfecthealth	_Idqol13a_2	-0.00198082	0.00506951	-0.0108905	-0.00807524	-0.0042578	-0.00831571	-0.00160863	-0.00996358	0.00714273	0.0147158	-0.00706178	-0.00250529	0.00333733	0.0222253	-0.00638846	-0.00558428	0.00215419	-0.0102538	-0.00236545	-0.00299309	-0.000262807	0.00527827	4.3449e-05	-0.00101146	0.0968469	0.125651	-0.0233234	-0.044951	0.0144174	0.0289568	-0.0051908	-0.00336446	0.00140042	0.0200393	-0.00476601	-0.00427977	-0.00729205	-0.00536325	-0.00408464	-0.00780286	-0.015889	-0.0144884	-0.00321361	-0.010077	-0.00896271	-0.00561035	0.00214496	-0.00123577
perfecthealth	_Idqol13a_3	0.0100391	0.0232363	-0.0288713	-0.0415966	-0.0155675	-0.0179882	0.0180412	0.0066052	0.0228119	0.0692342	-0.00834472	0.000836709	0.0186272	0.0265207	-0.00935269	0.0119587	0.000443185	-0.0282936	-0.00740822	-0.0335017	-0.00824231	-0.0142912	0.00349779	0.000339993	0.125651	0.322085	-0.0345792	-0.0787911	0.00393674	0.0244623	0.00576537	-0.00657346	0.00148637	0.0285558	-0.00649287	-0.0136249	-0.00473629	0.00820531	-0.0153225	-0.0248642	-0.00312791	0.014339	-0.00713309	-0.0328091	-0.00531425	0.00638741	0.00638743	-0.00789372
perfecthealth	_Idqol14a_2	-0.00299182	0.00398859	0.00357425	-0.0118843	0.00766784	0.00230418	-0.00632603	0.012525	-0.0146577	-0.0283781	-0.0109565	-0.0264881	-0.00367725	-0.0053637	-0.00380937	-0.00123082	-0.00110303	0.00169459	-0.00720876	-0.010234	-0.00834319	-0.0167296	0.00159031	0.0118436	-0.0233234	-0.0345792	0.10055	0.118524	-0.0152057	-0.038375	-0.0112251	-0.0104846	-0.00429753	0.00089243	-0.000737273	-0.00597187	-0.0114215	-0.0121666	0.000945194	0.00131694	0.0104245	-0.00153042	-0.00910783	-0.0067243	-0.00974549	0.00770244	-0.000334064	-0.00160895
perfecthealth	_Idqol14a_3	-0.00589579	-0.000731943	0.00612952	-0.00650081	-0.00174574	0.00382768	-0.0249449	-0.0163428	0.0331331	0.0160725	0.00601675	-0.00927932	-0.00571886	-0.0229731	-0.00379197	-0.0202482	-0.0109538	-0.0365039	-0.0233786	-0.0189526	-0.0178294	-0.0375387	0.0103276	0.00945672	-0.044951	-0.0787911	0.118524	0.327271	-0.0208276	-0.0397908	-0.0100985	-0.0171883	-0.0148892	-0.0164268	-0.00186006	0.000518217	-0.0247125	-0.0426942	-0.00215677	-0.0432945	-0.00320345	-0.00772671	-0.0164517	-0.0274984	0.0183198	0.0291628	-0.00169825	0.000151571
perfecthealth	_Idqol15a_2	-0.000608414	-0.00635053	0.00792728	0.0269141	-0.00852155	-0.00801425	0.00111866	-0.0184877	0.0296349	0.0421202	-0.0082539	-0.0104085	-0.015115	-0.0297276	-0.00397337	-0.0262591	-0.0115373	-0.0131078	-0.0276628	-0.0306684	0.0167509	0.00140567	0.00387188	-0.0157542	0.0144174	0.00393674	-0.0152057	-0.0208276	0.181202	0.187486	-0.00623632	0.00714259	-0.0825955	-0.14823	0.0113515	0.042005	-0.00766125	-0.0433164	-0.0153348	-0.0304474	-0.0280177	-0.0416191	-0.00259536	-0.00162178	0.0103948	0.0187256	-0.000148052	0.0023952
perfecthealth	_Idqol15a_3	-0.00285036	0.00479811	-0.00908443	0.0199062	-0.0159986	-0.0322986	0.0558254	0.0763615	0.0539541	0.118916	-0.00974156	-0.0122071	-0.0414471	-0.0821273	-0.0122008	-0.0893506	-0.00414225	-0.00671039	-0.026064	-0.0639836	0.0155187	0.0247166	-0.00595037	-0.0412492	0.0289568	0.0244623	-0.038375	-0.0397908	0.187486	0.515708	0.00296292	0.0186775	-0.0618835	-0.145864	0.0263689	0.0455669	-0.0188235	-0.0949884	-0.0134138	-0.0634842	-0.0454068	-0.0574997	-0.0160665	0.00208612	0.0402392	0.0278905	0.00105984	0.0012461
perfecthealth	_Idqol16a_2	0.0124149	0.0108965	-0.0063311	0.00252719	-0.00853925	-0.0104108	0.00409329	0.0249877	0.00442717	0.0106805	-0.000598761	-0.00689497	-0.00173288	0.00253882	-0.0135738	-0.025672	-0.00448345	-0.0121128	-0.00138961	-0.00576387	-0.00709028	-0.00846539	-0.00872039	0.000626376	-0.0051908	0.00576537	-0.0112251	-0.0100985	-0.00623632	0.00296292	0.0786988	0.0648773	-0.00408901	-0.0244045	-0.00576103	-0.00405031	0.00774357	0.00884428	-0.0092329	-0.00885638	0.000982974	0.00748242	-0.00267999	-0.00746548	-0.00185222	-0.00596364	0.00138097	-0.000234132
perfecthealth	_Idqol16a_3	0.0142898	0.0254427	-0.00769462	-0.0108287	-0.0132973	-0.0208468	-0.0149475	0.0137583	0.0125979	0.0250015	0.00175708	-0.00264317	-0.00899358	-0.0120713	-0.0132095	-0.0498857	-0.00759638	-0.0270352	-0.00775169	-0.00918692	-0.00637145	-0.0321954	-0.0101875	-0.00589301	-0.00336446	-0.00657346	-0.0104846	-0.0171883	0.00714259	0.0186775	0.0648773	0.159459	-0.0112843	-0.0334231	0.00891331	0.0141591	0.000152179	-0.0177903	-0.0105888	-0.0121828	-0.0148751	-0.00284171	-0.00772029	-0.0249743	0.00643202	0.0130347	0.00256584	-0.00182982
perfecthealth	_Idqol17a_2	0.00357122	-0.017132	-0.0305239	-0.0804666	0.0135522	0.0169791	0.0608727	0.151315	-0.0264683	0.0404779	-0.00778761	0.026136	6.3425e-05	0.0238901	-0.0204686	-0.00609147	0.015719	0.0134967	0.030709	0.0255642	-0.0179494	-0.00969509	-0.0124666	-0.0173374	0.00140042	0.00148637	-0.00429753	-0.0148892	-0.0825955	-0.0618835	-0.00408901	-0.0112843	0.512834	0.97201	-0.0112652	-0.0472086	0.0229894	0.0706733	0.0255641	0.107414	-0.0134927	-0.0291901	-0.00839498	-0.0369937	-0.025153	-0.0593974	-0.000837531	-0.0115849
perfecthealth	_Idqol17a_3	-0.00472882	-0.0431931	-0.0723943	-0.231506	0.0399094	0.0487083	0.048298	0.182422	-0.0776093	0.0249541	-0.0567466	-0.0195259	0.0714412	0.220077	-0.0173966	-0.061795	-0.00865804	-0.0310839	0.0794409	0.0978135	-0.0383779	-0.0262716	-0.0330093	-0.0394299	0.0200393	0.0285558	0.00089243	-0.0164268	-0.14823	-0.145864	-0.0244045	-0.0334231	0.97201	2.79264	0.00350528	-0.0431148	0.0538343	0.163494	0.0707342	0.244707	-0.0320526	-0.139629	-0.0148266	-0.0595399	-0.0469639	-0.100746	-0.00674514	-0.0327286
perfecthealth	_Idqol18a_2	-0.00255407	-0.000973431	-0.00342267	-0.000812244	-0.00414375	0.0130706	-0.0215981	-0.0379028	-0.00463287	-0.00775585	0.00464677	0.000580139	-0.00683506	-0.0145998	0.00964612	-0.007184	-0.0223308	-0.0281761	-0.0141337	-0.0219555	0.00417882	0.0134334	-0.0127913	-0.0250631	-0.00476601	-0.00649287	-0.000737273	-0.00186006	0.0113515	0.0263689	-0.00576103	0.00891331	-0.0112652	0.00350528	0.110101	0.127428	-0.020653	-0.0334901	-0.00622454	-0.00597634	-0.00751756	-0.0132316	-0.00972167	-0.0146797	0.000867667	-0.00207869	-0.000451553	0.001146
perfecthealth	_Idqol18a_3	0.00209661	0.0135961	-0.00214313	-0.00922241	-0.00115256	0.0236466	-0.0620563	-0.0868593	-0.020682	-0.0267812	-0.00310682	0.0142933	0.00192103	-0.0215548	0.0132965	-0.0395109	-0.0305691	-0.0663327	-0.0289323	-0.0220232	0.00603095	-0.00495354	-0.00816469	-0.0229752	-0.00427977	-0.0136249	-0.00597187	0.000518217	0.042005	0.0455669	-0.00405031	0.0141591	-0.0472086	-0.0431148	0.127428	0.289713	-0.0210886	-0.0687685	-0.00796576	-0.0174318	-0.0325413	-0.0202215	-0.0154697	-0.0380682	-0.0016961	-0.0131537	0.0013226	0.00207311
perfecthealth	_Idqol19a_2	-0.00918411	-0.00413984	-0.00213824	-0.00948314	0.00215902	-0.0154369	-0.00498267	0.0222626	-0.00334722	-0.0046154	-0.02259	-0.0258348	-0.00543019	0.00877558	-0.00414956	-0.00332844	0.00649184	0.0231481	0.00204101	0.0114082	-0.0121682	-0.00844686	-0.00301585	-0.0046191	-0.00729205	-0.00473629	-0.0114215	-0.0247125	-0.00766125	-0.0188235	0.00774357	0.000152179	0.0229894	0.0538343	-0.020653	-0.0210886	0.0892234	0.100869	-0.00342248	0.00363446	0.00107302	-0.0120274	0.000874834	0.00585571	-0.00504718	-0.0195795	5.90097e-05	-0.00207508
perfecthealth	_Idqol19a_3	-0.00395396	-0.0136991	-0.01097	-0.0295244	0.00826402	-0.0110683	0.0149574	0.0358028	0.00449372	-0.00582246	-0.0268784	-0.0377561	0.0118296	0.053638	-0.0218405	-0.00323958	0.0176017	0.0329904	0.0175075	0.0160484	-0.0132842	-0.0129872	0.000240888	0.00229969	-0.00536325	0.00820531	-0.0121666	-0.0426942	-0.0433164	-0.0949884	0.00884428	-0.0177903	0.0706733	0.163494	-0.0334901	-0.0687685	0.100869	0.250043	0.000630392	0.0203315	0.00761483	-0.0503209	0.00562646	0.0118125	-0.0312449	-0.0554672	-0.000839819	-0.00659013
perfecthealth	_Idqol20a_2	-0.0147248	-0.0153792	0.00366435	-0.0019499	0.00519028	0.00871993	0.00778223	0.0090196	-3.25564e-05	-0.00848123	-0.00916678	-0.0218603	-0.00695709	-0.000850218	0.00130426	0.0118057	-0.013262	-0.0193842	-0.00532638	-0.00616501	-0.00501515	0.00334539	0.00381109	-0.00282901	-0.00408464	-0.0153225	0.000945194	-0.00215677	-0.0153348	-0.0134138	-0.0092329	-0.0105888	0.0255641	0.0707342	-0.00622454	-0.00796576	-0.00342248	0.000630392	0.103118	0.135633	-0.00736828	0.0132804	-0.00648338	-0.0100641	0.00135893	-0.0130555	-0.00221316	-2.02289e-05
perfecthealth	_Idqol20a_3	-0.0115291	-0.0307041	-0.00528352	-0.0341938	0.000553112	-0.0076503	0.0360067	0.0582576	-0.0166974	-0.0268471	-5.25048e-05	0.00718265	-0.0153898	-0.00214373	0.0103907	0.0666917	-0.0215074	-0.0296939	-0.00128957	-0.0163698	0.00731919	0.00491511	0.0144677	0.0135223	-0.00780286	-0.0248642	0.00131694	-0.0432945	-0.0304474	-0.0634842	-0.00885638	-0.0121828	0.107414	0.244707	-0.00597634	-0.0174318	0.00363446	0.0203315	0.135633	0.384965	-0.00204942	0.0100095	-0.0172694	-0.0601825	0.000396639	-0.0153758	-0.0039518	-0.00412401
perfecthealth	_Idqol21a_2	-0.0101251	-0.0138813	-0.0129688	-0.0248576	0.00500248	-0.00578966	0.0310981	0.0454812	-0.00315601	-0.00926465	0.00648258	0.0113138	0.00694557	0.00505158	-0.00393683	0.0141025	0.000713896	0.00340326	0.00958624	0.00290694	-0.00317766	0.000218228	-0.0127805	-0.0034297	-0.015889	-0.00312791	0.0104245	-0.00320345	-0.0280177	-0.0454068	0.000982974	-0.0148751	-0.0134927	-0.0320526	-0.00751756	-0.0325413	0.00107302	0.00761483	-0.00736828	-0.00204942	0.154255	0.120503	-0.00155868	0.0111806	0.00164449	0.0227136	-0.00192579	-0.00289581
perfecthealth	_Idqol21a_3	0.00805948	0.0295445	-0.00993574	-0.00218445	0.00304875	0.0209304	0.0156405	-0.0266159	0.00539652	0.00508501	0.0112131	0.0101999	-0.0122119	-0.0931602	-0.0306506	-0.0125388	0.0228653	0.00946564	-0.00627005	-0.0302609	-0.00342023	-0.017093	-0.0132725	-0.00744308	-0.0144884	0.014339	-0.00153042	-0.00772671	-0.0416191	-0.0574997	0.00748242	-0.00284171	-0.0291901	-0.139629	-0.0132316	-0.0202215	-0.0120274	-0.0503209	0.0132804	0.0100095	0.120503	0.418554	0.00271826	0.00230293	-0.00384829	-0.0259109	0.00524629	-0.000739923
perfecthealth	_Idqol22a_2	-0.00593602	-0.0136371	0.01057	0.0109958	-0.00601897	-0.000132784	-0.0163949	-0.0313654	-0.00328506	-0.00518945	0.000979137	0.00811108	0.00226714	0.00377378	-0.000962009	-0.00420032	-0.000423258	0.00724782	0.00783994	0.0186322	-0.00845897	-0.0091607	-0.0048517	-0.00706722	-0.00321361	-0.00713309	-0.00910783	-0.0164517	-0.00259536	-0.0160665	-0.00267999	-0.00772029	-0.00839498	-0.0148266	-0.00972167	-0.0154697	0.000874834	0.00562646	-0.00648338	-0.0172694	-0.00155868	0.00271826	0.0595218	0.0682142	-0.00457171	-0.00848019	-0.00186181	0.00107716
perfecthealth	_Idqol22a_3	-0.011238	-0.0231191	0.0157133	0.0344597	-0.000184757	-0.00282747	-0.0384364	-0.0691206	-0.013285	-0.0179472	0.00601312	0.0020349	-0.00440164	-0.0236036	-0.00779197	-0.0332745	0.00515524	0.0297492	0.0233169	0.0511833	-0.0166356	0.0021358	-0.0159827	-0.0311842	-0.010077	-0.0328091	-0.0067243	-0.0274984	-0.00162178	0.00208612	-0.00746548	-0.0249743	-0.0369937	-0.0595399	-0.0146797	-0.0380682	0.00585571	0.0118125	-0.0100641	-0.0601825	0.0111806	0.00230293	0.0682142	0.208627	-0.00524835	-0.0220776	-0.00462879	0.00410677
perfecthealth	_Idqol23a_2	-0.0113713	-0.00959829	-0.00272104	0.00228246	-0.0140482	-0.00938914	0.0139741	0.0553434	0.00914175	0.0228646	-0.00297064	-0.000221802	-0.0130136	-0.0215192	-0.00404842	-0.0182372	-0.00837661	-0.00952209	-0.00665129	-0.0157745	-0.00561143	-0.00680648	-0.00536358	-0.0185076	-0.00896271	-0.00531425	-0.00974549	0.0183198	0.0103948	0.0402392	-0.00185222	0.00643202	-0.025153	-0.0469639	0.000867667	-0.0016961	-0.00504718	-0.0312449	0.00135893	0.000396639	0.00164449	-0.00384829	-0.00457171	-0.00524835	0.0978358	0.10013	-0.00151924	0.00128733
perfecthealth	_Idqol23a_3	-0.0104277	0.000684578	-0.00172593	0.00737915	-0.0177762	-0.033801	0.0206247	0.092128	0.00632841	0.0108013	0.0113658	-0.0043579	-0.0111745	-0.0203005	0.00102071	0.010549	-0.00474836	-0.0278667	-0.0120278	-0.0202783	-0.00684041	-0.0188388	-0.00289643	-0.00440629	-0.00561035	0.00638741	0.00770244	0.0291628	0.0187256	0.0278905	-0.00596364	0.0130347	-0.0593974	-0.100746	-0.00207869	-0.0131537	-0.0195795	-0.0554672	-0.0130555	-0.0153758	0.0227136	-0.0259109	-0.00848019	-0.0220776	0.10013	0.24495	-0.00036853	0.00326981
perfecthealth	dqolwi1	0.0152613	0.0323484	-0.00292173	-0.00425564	-0.00125072	-0.00388871	-0.00370601	-0.00530302	0.00483668	0.0166283	-0.00460837	-0.0105958	-5.32402e-05	0.000575308	-0.00428613	-0.00437084	0.00107624	-0.000777751	-0.000851171	-0.00537205	-0.000353646	-0.00339261	-0.000202516	-0.000958767	0.00214496	0.00638743	-0.000334064	-0.00169825	-0.000148052	0.00105984	0.00138097	0.00256584	-0.000837531	-0.00674514	-0.000451553	0.0013226	5.90097e-05	-0.000839819	-0.00221316	-0.0039518	-0.00192579	0.00524629	-0.00186181	-0.00462879	-0.00151924	-0.00036853	0.00665426	-0.00125427
perfecthealth	dqolwi2	-0.00305311	-0.00814613	0.0121861	0.0331337	0.000105382	0.00137526	0.00382183	0.0101175	-0.00123203	-0.00890071	0.00360908	0.000350089	-0.00185615	-0.00255693	0.00082047	-0.00290154	-0.00296713	-0.00612866	-0.000519633	0.00242585	0.00201942	0.00751038	-0.00158728	-0.00375808	-0.00123577	-0.00789372	-0.00160895	0.000151571	0.0023952	0.0012461	-0.000234132	-0.00182982	-0.0115849	-0.0327286	0.001146	0.00207311	-0.00207508	-0.00659013	-2.02289e-05	-0.00412401	-0.00289581	-0.000739923	0.00107716	0.00410677	0.00128733	0.00326981	-0.00125427	0.00566356
perfecthealth	dqolwi3	-0.00150397	-0.0043497	0.00210633	-0.000844775	0.00837824	0.0230009	-0.00960496	-0.0175645	-0.00787135	-0.0113744	-0.00144893	0.00192197	0.0018535	0.000734452	-0.000542387	-0.0101318	-0.00213563	-0.00402012	-0.00229995	-0.00143436	-0.00176515	-0.00471642	-0.000730589	0.000162606	-0.00248551	-0.00503736	0.00153573	0.00201117	-0.0018732	-0.0089046	-0.00112698	-0.0026596	0.00207609	0.00630829	0.000656107	0.00322623	-0.000896839	-4.87626e-05	0.000981228	-0.00147445	-0.00154643	0.00165757	0.00155588	0.000443294	-0.00192787	-0.005168	-0.00076019	-0.000187037
perfecthealth	dqolwi4	0.000697806	-0.00774972	0.00198644	0.0132186	-0.00342601	-0.0132185	0.129079	0.294557	0.00931236	0.0217197	-0.00339483	-0.00806358	-0.00726294	-0.00814523	-0.0152047	-0.00933093	-0.00127723	-0.0016912	-0.00754813	-0.0177471	0.00159921	0.00873205	-0.00289099	-0.00508004	-0.000139753	0.0023825	0.00298559	-0.00250947	0.000780587	0.0162796	0.00372607	0.00176058	0.0233744	0.0286072	-0.00497112	-0.0155182	0.00324788	0.00750618	-0.000877148	0.00444555	0.00798505	-0.00667366	-0.00457699	-0.0094707	0.00744734	0.0148843	-0.00162427	0.00254521
perfecthealth	dqolwi5	0.00608582	0.0107508	-0.000250722	-0.00634027	-0.00376565	-0.0102806	0.00940175	0.0358822	0.0735996	0.158327	0.00194775	-0.000437937	-0.00427863	-0.015105	-0.00651072	0.00343901	-0.00279313	-0.012466	-0.00675929	-0.0132802	-0.00040068	-0.00769233	-0.00241526	-0.00537981	0.00448422	0.0153988	-0.00495278	0.00533133	0.0119784	0.0256993	0.00237387	0.00341211	-0.00129203	-0.0171979	-0.00251893	-0.00619007	-0.00111598	-7.75272e-05	-0.00415823	-0.00984173	-0.00250758	-0.00207652	0.00036765	-0.00192668	0.00579208	0.00474256	0.00200143	-0.0011936
perfecthealth	dqolwi6	0.000733212	-0.00715366	0.000560831	-0.000573388	-0.0046359	0.00138012	0.00125961	0.00594514	0.0018139	0.00146375	0.0414999	0.087821	-0.00425039	-0.0158533	-0.000569505	-0.000821111	-0.00358056	-0.00776778	0.00153932	0.00318869	0.000924721	0.00617066	0.00363562	0.00543809	-0.00212877	-0.00204535	-0.00381812	0.00120283	-0.00237366	-0.000693188	-0.00016698	0.000840504	0.0074958	0.00698052	0.00144868	0.00255432	-0.00373528	-0.00524363	-0.00204835	0.00176268	0.00325893	0.00375449	0.000190057	-0.0013144	0.000557671	0.00183061	-0.000877037	0.000173008
perfecthealth	dqolwi7	5.46465e-05	-0.00309546	-0.00168006	-0.0044573	0.00174263	-0.000536726	-0.00527856	-0.012545	-0.0065995	-0.0102904	-0.00843628	-0.0118103	0.0218325	0.0554547	-0.000538125	-0.00568958	-0.00121299	-0.00364154	0.000919227	0.00392283	-0.0040114	-0.00976623	-0.00159035	0.000239853	0.00337115	0.00319307	-0.00175561	-0.00368755	-0.00639907	-0.0159482	-0.000418793	-0.00196164	0.00830803	0.0433339	-0.00154988	-0.00163009	0.00162397	0.00855177	0.00184399	0.00377176	0.000691914	-0.00856189	0.00090962	-0.00324813	-0.00344365	-0.00668653	-0.000504726	-0.000508826
perfecthealth	dqolwi8	-0.000930512	-0.00864029	-0.000529418	-0.00455182	-0.00176728	-0.00613239	-0.00572133	-0.0272769	-0.00125752	-0.00462644	-0.00187494	-0.00605072	0.000506527	-0.0073799	0.0334184	0.0991338	-0.000829712	0.00812779	-0.00264357	-0.00623821	0.000785204	0.00644491	0.00397968	0.00226669	-0.00054322	0.0024724	0.00165839	0.000461202	-0.0014778	-0.0132242	-0.0039134	-0.00810186	0.00192944	0.00661388	-0.0014008	-0.0049994	-0.000787867	0.00100621	0.00198424	0.00895312	-0.000132766	-0.00373872	-5.42826e-05	-0.00337534	-0.0031977	-0.00114302	-0.00104294	-0.000944961
perfecthealth	dqolwi9	-0.00118358	-0.000601043	-0.00458891	-0.00698858	0.000585708	-0.000976688	0.00293945	-0.00371543	-0.00741839	-0.0140024	-0.00204993	-0.00121994	-0.00197164	-0.0028621	-0.00327762	0.0028031	0.0215888	0.0441585	0.00428926	0.00338736	-0.00188551	0.00112602	-0.00280364	-0.00374083	-0.0021395	-0.00348547	8.67318e-05	-0.00621585	-0.00254901	0.000617388	-0.00175217	-0.00419732	0.00070256	-0.00512828	-0.0043498	-0.0116477	0.00271709	0.0032353	-0.00295217	-0.00424582	0.00432555	0.00904068	0.000596297	0.00595092	-0.00061905	-0.00280791	4.46101e-05	-0.00133201
perfecthealth	dqolwi10	-0.00304823	-7.12102e-05	0.00127512	0.00126555	8.49578e-05	-0.00337051	-0.00936571	-0.0144068	-0.00479676	-0.0125423	0.00042162	0.0029298	0.000121287	0.0047939	0.000819396	-0.00769074	0.00275107	0.00409136	0.0144413	0.0336442	-0.000645301	-1.4265e-05	-0.00153579	-0.00262416	5.15535e-06	-0.00407555	-0.000866757	-0.00369878	-0.00560066	-0.00873884	-0.00136439	-0.00236902	0.00330331	0.0159884	-0.00349762	-0.00594006	0.00154638	0.00187889	-0.00165009	-0.00361075	0.000844557	-0.00296144	0.00168694	0.00665716	-0.00172828	-0.000868759	-0.000582051	0.000506066
perfecthealth	dqolwi11	-0.000159597	-0.00266304	0.00295636	0.0105533	-0.00319866	-0.000803606	0.0017516	-0.00278277	0.00307408	-0.0056726	0.00798984	0.00641388	-0.00531158	-0.0148306	0.00113664	0.00424982	-0.003779	-0.00456068	-0.00289206	-0.00590694	0.0140529	0.0324195	-0.000127895	-0.000710949	8.27037e-05	-0.00264346	-0.00228573	-0.00127521	0.00509454	0.0108271	0.000168932	0.00019309	-0.0161173	-0.0394252	0.0025699	0.00183325	-0.00421844	-0.00902976	-0.00324121	-0.00905375	0.000375629	-0.00340504	-0.00149281	-0.000156705	9.92002e-05	-0.000625635	-0.000407633	0.00149616
perfecthealth	dqolwi12	0.000771549	0.00149093	-0.000951186	-0.00477881	-0.00152511	-0.00261938	0.00262016	0.00669224	0.00101487	-0.000572549	0.00291595	0.00537905	-0.00143373	-0.00267252	0.000716558	0.00369043	-0.00215979	-0.00293889	-0.0019098	-0.00573875	0.00197911	-0.000928312	0.00919594	0.0205125	-0.00129081	-0.000442169	0.00185425	0.00351559	-0.00168261	-0.00440648	0.00142633	0.00116225	-0.00329233	-0.00998126	-0.00162687	-0.000714061	-0.00130874	-5.61869e-05	-0.000549734	0.00300972	-0.000407245	-0.000502889	-0.000600584	-0.00445083	-0.00198281	-0.000455515	-2.1096e-06	-0.000644249
perfecthealth	dqolwi13	0.00222848	0.00587644	-0.00361244	-0.00640325	-0.00211889	-0.00394405	-1.50116e-05	-0.0015459	0.00340053	0.0106243	-0.00421435	-0.00226716	0.00140927	0.00516417	0.000870531	0.00371231	-0.00166926	-0.00616047	-0.00132756	-0.00293923	-0.00136556	-0.00245982	-0.000282026	-0.00242421	0.0167822	0.0419395	-0.00454026	-0.011289	0.00371781	0.00623823	0.00117748	0.000774978	0.000304811	0.00194311	0.000506479	0.00131496	-0.000280253	-0.000530635	-0.000829463	-0.00088979	-0.00252395	-0.00234905	-0.0012894	-0.00484163	-0.000304084	0.000882993	0.00101619	-0.00105657
perfecthealth	dqolwi14	-0.00064845	-0.000138172	0.00119694	0.000312225	-0.000848036	-0.000175196	-0.00249073	0.00286211	0.00143668	-0.000159094	0.0023024	-0.00165606	-0.00117264	-0.00284909	-0.00105862	-0.00456406	-0.000183267	-0.00201249	-0.00143758	0.000647737	-0.00246672	-0.00602862	0.00142996	0.00209252	-0.00510727	-0.00960008	0.0157259	0.0413818	-0.00250801	-0.00795409	-0.0016838	-0.00210172	-0.00184531	0.00182066	-0.0032339	-0.00537939	-0.00206977	-0.0029576	-0.0032229	-0.00871261	0.000500147	-0.00217948	-0.000831369	-0.000334296	0.00339296	0.00723045	-0.000104616	-4.64061e-05
perfecthealth	dqolwi15	-0.000640773	0.00116206	-0.00106762	0.0033991	-0.00159453	-0.00290003	0.0085641	0.0145784	0.0108911	0.0207089	-0.00397652	-0.0023468	-0.00758754	-0.0128996	-0.00440062	-0.0188221	-0.000593103	-0.00278902	-0.00557847	-0.0104067	0.00229841	-0.000512891	-0.0013739	-0.00819761	0.00376579	0.00159309	-0.00410138	-3.09525e-06	0.0345636	0.0811543	-0.000597832	0.00280404	-0.0139649	-0.0341227	0.00577909	0.0107506	-0.00390935	-0.0172621	-0.00361034	-0.0121651	-0.00749284	-0.0104377	-0.00440563	-0.00322131	0.00705914	0.00691221	0.0003334	0.000292211
perfecthealth	dqolwi16	0.00104966	0.00385667	-0.000351388	-0.00115585	-0.00165585	-0.00290832	-0.00191386	0.0015671	0.000869917	0.00318824	0.000975836	-0.000129053	-0.000970318	-0.000461684	-0.00214995	-0.00863328	-0.00115911	-0.0038199	-0.0017598	-0.0020956	-0.000826424	-0.00537983	8.66867e-05	0.00133738	4.41169e-05	-0.000350632	-0.00215276	-0.00353993	0.00164703	0.00412872	0.00623147	0.018493	-0.00218682	-0.00731243	0.000549348	0.00195587	0.000177382	-0.00274388	-0.000675096	-0.00121051	-0.00450043	-0.00197017	-0.000437256	-0.00418977	0.00189722	0.00259226	0.000465971	-0.000253017
perfecthealth	dqolwi17	0.00135634	-0.00367129	-0.0113812	-0.0331579	0.00666637	0.00705958	0.0229327	0.0665653	-0.00698218	0.0161356	-0.00185712	0.0132028	0.00729735	0.0212671	-0.0058329	-0.00902149	-0.000593131	-0.00491833	0.0132115	0.0113549	-0.00824372	-0.0019953	-0.0061215	-0.00577186	0.00244537	0.00962826	-0.000462266	-0.00527211	-0.029495	-0.023525	-0.0043806	-0.00715007	0.157354	0.403777	3.39233e-05	-0.012131	0.00789241	0.022714	0.00784085	0.0318563	0.00184536	-0.00949299	-0.00404177	-0.0105701	-0.00545986	-0.012779	-0.000191531	-0.00460276
perfecthealth	dqolwi18	0.00131753	0.00260949	-0.00083207	-0.00126325	0.000433956	0.00314314	-0.00806369	-0.0143057	-0.00212451	-0.00588134	0.00104554	0.00309307	0.00220932	0.000114284	1.37524e-05	-0.00700552	-0.00441506	-0.00874293	-0.00192944	0.000289789	-0.000380315	0.000689658	-0.000841042	-0.00217953	-0.000590893	-0.0029941	-0.00154538	-0.000792615	0.00435747	0.00455301	0.000511293	0.000464154	-0.00532465	-0.00361176	0.0134551	0.0307076	-0.000611448	-0.00106702	-0.000625821	-0.0039517	-0.00453229	-0.00701132	-0.000609073	-0.00162906	-0.00217548	-0.00470201	-1.32639e-05	1.72358e-05
perfecthealth	dqolwi19	-0.000644901	-0.00309445	-0.00180994	-0.00216381	0.000820806	-0.00303068	0.00149341	0.00221937	-0.00145937	-0.00372109	-0.00525948	-0.00798393	0.00270284	0.00772662	-0.00366116	0.000125587	0.00376202	0.00809453	0.00208917	0.000666982	-0.00171622	0.000408074	-0.000620963	0.000166157	-4.31907e-06	0.00327811	-0.000224931	-0.0067677	-0.00456311	-0.0135979	0.000555313	-0.00299622	0.00728039	0.0194327	-0.00327202	-0.00653927	0.0120286	0.0313531	0.000718303	0.00298691	0.00284415	-0.00558168	2.23087e-05	0.00201491	-0.00485866	-0.00762491	0.000194123	-0.000600082
perfecthealth	dqolwi20	-0.00195783	-0.00305437	0.000448633	-0.00143554	-0.00015647	-0.00168375	0.00396862	0.0047971	-0.00460327	-0.00515329	0.000982098	0.0016558	-0.00269919	-0.00377974	0.00366944	0.0103302	-0.00406617	-0.00373604	0.000849004	-0.000335633	0.00130557	0.00311763	0.000999967	-0.000490198	-0.00108084	-0.00345269	-0.00211168	-0.00868578	-0.00362653	-0.0020386	-0.00129749	-0.00160085	0.0163787	0.037533	-2.53075e-05	-0.00137	-8.08193e-05	-0.00203899	0.0189847	0.0510579	-0.000156479	0.00453739	-0.00186606	-0.00394937	0.000197201	-0.00202924	-0.000784621	1.56533e-06
perfecthealth	dqolwi21	0.00024804	0.00151867	-0.00306632	-0.00344023	-0.000155455	0.000610728	0.008224	0.00920196	-0.00328224	-0.0054177	0.00209667	0.00361772	-0.00104936	-0.0118951	-0.0026251	0.0033038	0.00256389	0.00317584	-0.00126709	-0.00436931	0.00021231	-0.000373205	-0.00120429	0.00067555	-0.00274002	0.000625495	-0.000100957	-0.0018935	-0.00663646	-0.00769207	0.0020396	0.000604739	0.00119787	-0.00694539	-0.00109147	-0.000185105	-0.0013746	-0.00602869	0.00281144	0.00672098	0.0166168	0.0510484	-0.000195057	-0.000145219	-0.00105627	-0.00335315	-0.000256578	-0.000485194
perfecthealth	dqolwi22	-0.00211324	-0.00207344	0.00283638	0.00411607	0.00145353	0.00240245	-0.00614261	-0.0193213	0.00127926	-0.000747783	-0.00275885	-0.00492301	0.00100048	0.000633914	-0.000297104	-0.00445527	-8.40949e-05	0.0014434	0.00230223	0.00454309	-0.00230942	-0.00172736	-0.00144	-0.00239369	-0.00155859	-0.00529223	-0.00137337	-0.00498495	-0.00452113	-0.00586231	-0.000665399	-0.00266382	-0.00419987	-0.00281342	-0.00129564	-0.00242386	0.0002564	0.00152929	0.00151209	-0.00413418	0.000146955	0.00695518	0.00749458	0.0235164	-0.00195994	-0.00648922	-0.00079613	0.000546835
perfecthealth	dqolwi23	-0.00282327	-0.00262102	-1.0866e-05	0.000397529	-0.0016245	-0.0045406	0.00227809	0.00935377	0.00197353	0.00206356	0.00140325	-0.00166436	-0.00311668	-0.00420235	0.00217521	0.00509732	5.56601e-05	-0.00209843	-0.000394121	-8.13722e-05	-0.00121049	-0.00319991	-0.00152954	-0.00219897	0.000354837	0.00182242	0.00166567	0.00493925	0.00158085	0.00264909	-0.000950129	0.000895424	-0.00638042	-0.00879009	-0.000593963	-0.00271208	-0.00279907	-0.00731277	-0.000532772	0.0011471	0.00271188	-0.00428608	-9.42936e-05	-0.00238564	0.0115869	0.0303483	-0.000521141	0.00026206
perfecthealth	_cons	-0.00170981	0.00126812	-0.00480233	-0.00587476	-0.000893838	-0.0023224	-0.00558377	-0.00753291	0.00148637	0.000862948	-0.000462669	-0.00198613	0.0039878	0.00466935	0.00146063	-0.00276673	-0.000748484	-0.00179214	-0.000805388	3.78421e-05	-0.000952238	-0.00299433	-0.0129748	-0.0113041	-0.00210442	-0.00167278	-0.00156825	0.00235134	0.00124105	0.00327871	-0.00628474	-0.00656221	-0.00674314	-0.00704816	-0.00101705	0.00374887	-0.00698967	-0.0111776	-0.000802985	-0.00224317	0.00353738	0.00844248	-0.00389405	-0.000702212	-0.000211048	0.00206353	9.48752e-05	-6.15108e-05
[truncated: 22 more columns]

## Sheet: OLS
	dqolIscore	_Idqol1a_2	_Idqol1a_3	_Idqol2a_2	_Idqol2a_3	_Idqol3a_2	_Idqol3a_3	_Idqol4a_2	_Idqol4a_3	_Idqol5a_2	_Idqol5a_3	_Idqol6a_2	_Idqol6a_3	_Idqol7a_2	_Idqol7a_3	_Idqol8a_2	_Idqol8a_3	_Idqol9a_2	_Idqol9a_3	_Idqol10a_2	_Idqol10a_3	_Idqol11a_2	_Idqol11a_3	_Idqol12a_2	_Idqol12a_3	_Idqol13a_2	_Idqol13a_3	_Idqol14a_2	_Idqol14a_3	_Idqol15a_2	_Idqol15a_3	_Idqol16a_2	_Idqol16a_3	_Idqol17a_2	_Idqol17a_3	_Idqol18a_2	_Idqol18a_3	_Idqol19a_2	_Idqol19a_3	_Idqol20a_2	_Idqol20a_3	_Idqol21a_2	_Idqol21a_3	_Idqol22a_2	_Idqol22a_3	_Idqol23a_2	_Idqol23a_3	dqolwi1	dqolwi2
dqolIscore	0.000130797	1.10378e-06	-2.21789e-05	2.12849e-05	-2.67573e-05	-4.36601e-05	-4.42409e-05	5.76461e-05	-5.5121e-05	3.33768e-05	0.000117032	0.000102789	0.000141355	-8.04036e-06	-8.1424e-05	-3.05758e-05	-0.000124901	-1.25843e-05	-1.14553e-05	6.50968e-05	1.97527e-05	-7.9712e-07	-6.3949e-05	9.37117e-05	0.000162954	-2.10212e-06	4.03122e-05	-2.71871e-06	-4.59209e-05	1.08201e-05	9.7404e-06	-5.56379e-05	1.50197e-05	-2.30673e-05	1.5118e-05	2.00588e-05	-2.21903e-05	8.8357e-05	0.000203333	7.2956e-06	4.86722e-05	-3.91037e-05	3.87391e-05	-3.02347e-05	-2.27951e-05	-4.99734e-05	-4.00108e-06	3.61246e-07	-1.96178e-05
_Idqol1a_2	1.10378e-06	0.000937067	0.000975536	-0.000147988	-2.0962e-05	-5.46745e-05	-0.000209985	8.65246e-05	-0.000284176	0.000404263	0.00115024	0.000157874	0.000256063	-1.83182e-05	0.000169935	-0.000372108	-0.000475072	-0.000235043	-0.000505463	0.000129502	-3.98878e-05	-9.22031e-05	-0.000145586	9.07966e-06	5.50576e-05	3.72013e-05	1.17372e-05	-1.58314e-05	-2.12009e-05	0.000187053	0.000605764	5.74045e-05	-4.62297e-05	-0.000296269	-0.000349871	9.07469e-05	0.000377404	-0.00013193	-2.17014e-05	-0.000136756	-0.000703519	-9.78798e-05	-0.00010942	-0.000235734	-1.70569e-05	0.000184057	0.00012678	0.000124898	-8.65674e-06
_Idqol1a_3	-2.21789e-05	0.000975536	0.00209369	-7.71886e-05	-0.00017829	-5.03617e-05	-0.000400605	-0.000426741	-0.000534109	8.8984e-05	-0.000321993	0.000200717	0.000167738	-2.22913e-05	0.000164661	-0.000349592	-0.000904894	-0.000233445	-0.000762429	0.000118398	0.000285242	-0.000164887	-0.000233095	-7.02922e-05	-0.0002389	4.76236e-05	0.000308051	-4.05049e-05	-0.000117207	-4.21553e-06	-0.000119516	7.57983e-05	0.000156409	-1.43198e-05	-0.000228388	-4.02374e-06	0.000138868	5.21246e-05	7.40304e-06	-4.54684e-05	-0.000362135	-0.000159372	-0.000444297	-0.000313997	-0.000139356	0.000137546	0.000229438	0.000275919	-2.38171e-05
_Idqol2a_2	2.12849e-05	-0.000147988	-7.71886e-05	0.00096961	0.0010139	0.000109974	5.61476e-05	0.000129152	0.000127203	0.000234627	0.000136285	0.000150596	0.000272878	-0.000174135	-0.000138628	-5.63369e-05	1.33252e-05	-8.13455e-05	-0.000241246	-3.16095e-05	0.000157157	-0.000191929	0.000101365	-0.000109328	-1.57194e-06	-0.000127457	-6.5637e-05	-9.94379e-05	-4.31646e-05	0.000178367	-6.20004e-06	-5.16812e-05	-0.000380541	-0.000272912	-0.00103581	-4.90188e-05	0.000183092	-9.91819e-06	-0.000230431	-0.000111917	-0.000376643	-5.3899e-05	-0.000189153	8.09547e-05	2.72761e-05	-3.53888e-05	7.68366e-05	-3.26957e-05	8.96526e-05
_Idqol2a_3	-2.67573e-05	-2.0962e-05	-0.00017829	0.0010139	0.00216617	0.000242577	6.01354e-05	0.000801295	0.000146645	0.000372896	0.00114005	0.00031898	0.000606994	4.22872e-05	0.000198805	-0.00030701	2.99856e-05	-0.000139415	-0.000510904	-0.000191709	-9.22107e-05	-0.000141767	0.000189278	-0.000265455	-0.000152133	-0.000136095	-0.000197236	2.89819e-05	0.000201478	0.000272373	0.000318737	-0.000111816	-0.00064145	-0.00059882	-0.00154638	0.000192192	0.000664657	-0.000155995	-0.000305942	-0.000225433	-0.00076027	4.3166e-06	-0.000176163	8.23562e-06	5.15714e-05	3.73169e-05	0.000149258	-3.62015e-05	0.000250016
_Idqol3a_2	-4.36601e-05	-5.46745e-05	-5.03617e-05	0.000109974	0.000242577	0.000764808	0.000710091	0.000494779	-0.000202404	4.21992e-06	0.000380998	6.5727e-05	0.000234594	7.32669e-05	9.48521e-05	-5.7642e-05	-4.57104e-05	-0.000163298	-0.000418732	-0.000149214	-0.000164398	-0.000204573	-0.000232862	-0.000200934	-6.96885e-05	1.24837e-05	0.000120503	3.9358e-05	0.000165486	-2.34628e-05	0.000328792	-5.20856e-05	-0.000192087	-2.91174e-05	-0.000139856	-8.34336e-07	0.000282112	-5.4542e-05	-0.000271576	-0.000130834	-0.000549135	-1.98615e-05	3.65679e-05	-8.41061e-05	2.17315e-05	-8.09926e-05	-0.000226633	-1.01483e-05	4.77114e-05
_Idqol3a_3	-4.42409e-05	-0.000209985	-0.000400605	5.61476e-05	6.01354e-05	0.000710091	0.00175097	0.000283406	-0.000256621	0.000318934	0.000439939	-4.6282e-05	0.000285941	-7.88812e-05	-0.000226778	0.000235992	0.000363968	-0.000301781	-0.000489441	-0.000154514	-4.59625e-05	-0.000143743	-0.000195253	-7.98759e-05	0.00014132	0.000198873	0.00031352	6.30372e-05	0.000196648	-0.000403715	-0.000112502	0.000127402	-0.000172282	9.42214e-05	-0.00040072	-0.000255018	-0.000271095	-0.000175587	-0.000603553	2.02988e-05	-0.000236772	-0.000118931	0.000148028	-2.02471e-06	-3.36459e-05	-0.000103536	-0.000330491	-5.33429e-05	5.39124e-05
_Idqol4a_2	5.76461e-05	8.65246e-05	-0.000426741	0.000129152	0.000801295	0.000494779	0.000283406	0.00848324	0.000476965	-0.00144877	-0.000206275	5.58591e-05	0.000647608	0.000148066	0.000559517	-0.000413398	5.24095e-05	-0.000650542	-0.000913178	0.000555337	0.000139226	-0.000202221	-0.000313994	-3.57407e-05	0.000607937	0.000423014	0.000490225	0.000167213	3.62734e-06	-5.86263e-05	0.000185836	-0.000299996	-0.000243016	-0.000556895	-0.000507799	-0.000980855	-0.00119632	5.68872e-05	0.00031156	-7.08933e-05	0.000859126	-0.000209121	0.000149006	-0.000113769	-1.39065e-05	0.000464051	4.11574e-05	-6.98304e-05	5.74279e-05
_Idqol4a_3	-5.5121e-05	-0.000284176	-0.000534109	0.000127203	0.000146645	-0.000202404	-0.000256621	0.000476965	0.0107094	-0.000125646	0.000713696	-0.000331678	-0.000272442	7.41741e-05	0.000446691	-3.71989e-05	0.000511875	0.000153662	0.000105537	-0.000608498	-0.000164436	-2.75338e-05	-0.000496756	5.87036e-05	-0.000128529	-0.000521911	-0.000923158	0.000666463	0.0012958	0.000623712	0.000198138	-0.000284435	-0.000303978	0.000726428	0.000168252	0.000184494	0.000311225	8.65319e-05	-8.98904e-05	-0.000475275	-0.00094679	0.000507728	-0.000248519	0.000539795	0.000283715	0.00012055	0.000105192	-9.0516e-05	6.59817e-05
_Idqol5a_2	3.33768e-05	0.000404263	8.8984e-05	0.000234627	0.000372896	4.21992e-06	0.000318934	-0.00144877	-0.000125646	0.00525011	0.00744579	-0.000484779	-0.000971209	-0.000326651	-0.000549336	-0.000477022	-6.32608e-06	0.000209839	0.000215111	-0.000111864	0.000496007	5.45208e-05	0.000448041	-0.00018016	-0.000216025	-0.000201314	-0.000177936	-0.000297724	0.000215478	0.000800791	0.00119032	0.000271434	-0.000273421	-0.000822106	-0.000982261	0.000483728	0.000960629	0.000201834	0.000489297	-0.000466817	-0.00163874	-0.000360186	-0.000463169	-0.000392747	-0.000914211	-1.49553e-05	0.000198057	-4.94133e-05	-1.79847e-05
_Idqol5a_3	0.000117032	0.00115024	-0.000321993	0.000136285	0.00114005	0.000380998	0.000439939	-0.000206275	0.000713696	0.00744579	0.018814	-0.000723453	-0.00110492	0.000146452	3.92256e-05	-0.000846721	0.000116309	-1.48727e-05	-0.000114958	-0.000351155	0.000283461	-9.8954e-06	-0.000261375	-0.000459146	-7.89019e-05	0.000351932	0.000182469	-0.00030004	0.000343856	0.0017076	0.00366163	-0.000115718	-0.00119161	-0.00236409	-0.00251996	0.00106814	0.00295595	0.000285439	0.0004681	-0.00135405	-0.00396177	-0.000499058	0.00116451	-0.000358967	-0.00046415	0.000128829	-3.9028e-05	-9.24854e-05	4.9287e-05
_Idqol6a_2	0.000102789	0.000157874	0.000200717	0.000150596	0.00031898	6.5727e-05	-4.6282e-05	5.58591e-05	-0.000331678	-0.000484779	-0.000723453	0.0016641	0.0025967	-1.26224e-05	-0.000272964	-0.000440661	-0.000752304	-0.000258106	-0.000472151	4.69768e-05	-0.000526448	-0.000330473	-0.000166828	6.82875e-05	0.000153367	-0.000114777	7.70842e-05	-5.43842e-05	-0.00010181	-0.00017224	8.5976e-05	-4.92417e-05	7.91624e-05	0.000130906	0.000268373	9.91647e-06	-2.08991e-05	-6.89205e-05	0.00025537	0.000135145	-3.85505e-05	-0.000126597	-0.000518848	6.86094e-06	0.000129354	-2.39932e-05	1.24589e-05	3.9312e-05	2.20908e-05
_Idqol6a_3	0.000141355	0.000256063	0.000167738	0.000272878	0.000606994	0.000234594	0.000285941	0.000647608	-0.000272442	-0.000971209	-0.00110492	0.0025967	0.00628288	-8.0307e-05	-0.000496694	-0.00024809	-0.000677592	-0.00068739	-0.00121284	-0.00023265	-0.000797604	-0.000472681	-0.000567993	0.000329344	0.000533191	0.000121937	0.000432615	0.000175636	-3.52569e-05	-0.000557712	-0.000435762	-0.000347223	-0.000342654	2.91516e-05	-0.000248686	-0.000189924	-0.000181433	-0.000140762	0.000296309	0.00022926	-0.000175928	-0.000110628	-0.000754225	5.15519e-05	0.000455278	-6.2249e-05	-0.0003991	1.8454e-05	5.17834e-05
_Idqol7a_2	-8.04036e-06	-1.83182e-05	-2.22913e-05	-0.000174135	4.22872e-05	7.32669e-05	-7.88812e-05	0.000148066	7.41741e-05	-0.000326651	0.000146452	-1.26224e-05	-8.0307e-05	0.000929112	0.00119257	-6.31808e-05	-0.000330023	-0.000265928	-0.000606071	-0.000239282	-0.00022625	-0.000167255	-0.000340432	-0.000148482	4.49041e-05	-0.000139518	-0.00019658	0.000173707	0.000308666	9.10634e-05	0.000344509	3.61273e-05	3.96284e-05	-1.86583e-05	0.000130981	0.000108952	9.98251e-05	-2.61548e-05	-1.1924e-06	1.08742e-05	-6.31194e-05	0.000118429	-2.5755e-05	-0.000103062	1.55546e-05	-1.70669e-05	-2.2855e-05	1.15231e-05	3.18686e-05
_Idqol7a_3	-8.1424e-05	0.000169935	0.000164661	-0.000138628	0.000198805	9.48521e-05	-0.000226778	0.000559517	0.000446691	-0.000549336	3.92256e-05	-0.000272964	-0.000496694	0.00119257	0.00292247	-0.000168823	-0.000919441	-0.000663131	-0.00113392	-0.000461074	-0.000249241	-0.000150305	-0.000637543	-7.60345e-05	0.000219539	-0.00015667	-0.000438412	0.000361112	0.000571661	0.000271272	0.000446266	0.000114014	-0.000139313	-0.000327202	-0.000747303	1.76438e-05	0.000125095	5.15557e-05	-6.38117e-05	-1.23734e-05	-0.000183142	0.000185986	-0.000213532	-4.88506e-05	0.00016538	0.000151878	-9.72847e-06	2.16227e-05	5.08206e-05
_Idqol8a_2	-3.05758e-05	-0.000372108	-0.000349592	-5.63369e-05	-0.00030701	-5.7642e-05	0.000235992	-0.000413398	-3.71989e-05	-0.000477022	-0.000846721	-0.000440661	-0.00024809	-6.31808e-05	-0.000168823	0.0012807	0.00179593	3.55006e-05	0.000294885	-0.00026964	-0.000129507	0.000265397	0.000156777	0.000196655	0.000129186	0.000163207	0.000131301	2.87957e-06	-0.00023743	-0.000433068	-0.000860841	-0.000207277	-0.000115598	0.000211725	0.000197309	-0.000107566	-0.000290894	-0.000124658	-0.000538903	0.000116847	0.000790587	1.52828e-05	0.000141639	0.000223731	0.000199469	-0.000160689	-0.000241629	-3.56204e-05	-2.25975e-05
_Idqol8a_3	-0.000124901	-0.000475072	-0.000904894	1.33252e-05	2.99856e-05	-4.57104e-05	0.000363968	5.24095e-05	0.000511875	-6.32608e-06	0.000116309	-0.000752304	-0.000677592	-0.000330023	-0.000919441	0.00179593	0.00546787	0.000244031	0.000757267	-0.000253512	-0.000222202	0.000470744	0.000692259	0.000143331	-4.70906e-05	0.000281447	5.39021e-05	-2.22414e-05	-0.000148737	-0.000569871	-0.0014937	-0.000413194	-0.000595374	-0.000131034	-0.000594168	-0.000113999	-0.000115558	-0.000409347	-0.000969895	0.000149872	0.000862022	-0.00019974	-0.000297219	0.000473915	0.000122722	3.9645e-05	-0.000246836	-5.56395e-05	2.07649e-05
_Idqol9a_2	-1.25843e-05	-0.000235043	-0.000233445	-8.13455e-05	-0.000139415	-0.000163298	-0.000301781	-0.000650542	0.000153662	0.000209839	-1.48727e-05	-0.000258106	-0.00068739	-0.000265928	-0.000663131	3.55006e-05	0.000244031	0.001191	0.00166338	5.43076e-05	-1.86901e-06	0.00012247	0.000384932	-5.60075e-05	-0.000354585	2.52957e-05	-0.000112518	-0.000155981	-0.000209323	6.6269e-05	1.01104e-05	-0.000196089	-6.21486e-05	0.000323602	0.000556515	7.01049e-05	1.48278e-05	-3.4777e-05	8.92684e-05	-6.80068e-06	5.34099e-05	-2.19169e-05	-1.28912e-05	2.98881e-05	-0.00010138	-2.89085e-05	-2.60601e-05	-1.85168e-05	-2.27092e-05
_Idqol9a_3	-1.14553e-05	-0.000505463	-0.000762429	-0.000241246	-0.000510904	-0.000418732	-0.000489441	-0.000913178	0.000105537	0.000215111	-0.000114958	-0.000472151	-0.00121284	-0.000606071	-0.00113392	0.000294885	0.000757267	0.00166338	0.00348668	0.000181668	3.16972e-05	0.000590013	0.000761776	0.000122226	-0.000450607	8.13072e-05	-0.000248548	-0.000277259	-0.000743806	0.000109163	-6.99392e-05	-0.000398111	-3.8684e-05	0.000397817	0.000681118	5.79799e-05	-0.000433882	-0.000164343	9.7412e-05	2.69475e-05	0.000707997	-2.91996e-05	0.000129073	0.000370793	3.56035e-05	-6.50793e-05	-0.000163785	-7.92466e-05	-9.86935e-05
_Idqol10a_2	6.50968e-05	0.000129502	0.000118398	-3.16095e-05	-0.000191709	-0.000149214	-0.000154514	0.000555337	-0.000608498	-0.000111864	-0.000351155	4.69768e-05	-0.00023265	-0.000239282	-0.000461074	-0.00026964	-0.000253512	5.43076e-05	0.000181668	0.00116474	0.00100676	-0.000142291	-3.44786e-05	-0.00011431	-0.000260416	-9.4989e-06	0.000288173	-0.00027155	-0.000531315	-0.000198705	-0.00033385	6.59115e-05	0.000228877	5.12625e-05	0.000180901	-0.000152713	-0.000422093	0.000162393	0.00033459	9.16096e-07	0.000370279	-9.85364e-05	0.000296263	-3.63729e-05	-7.694e-05	3.50875e-05	0.000178882	3.26002e-05	-1.4569e-05
_Idqol10a_3	1.97527e-05	-3.98878e-05	0.000285242	0.000157157	-9.22107e-05	-0.000164398	-4.59625e-05	0.000139226	-0.000164436	0.000496007	0.000283461	-0.000526448	-0.000797604	-0.00022625	-0.000249241	-0.000129507	-0.000222202	-1.86901e-06	3.16972e-05	0.00100676	0.00254891	7.47879e-05	-6.72872e-05	-0.000350588	-0.000683123	7.23812e-06	0.000390098	-0.00028465	-0.000759324	-0.000151014	-0.000993003	0.000115967	-7.23389e-05	-6.83734e-05	-0.00058563	-0.000158874	-0.000275749	0.000571797	0.000318729	-0.000375865	2.66969e-05	2.92611e-05	0.000527284	0.000147309	-8.11163e-05	-0.000167165	-5.40408e-05	1.44387e-05	-1.20708e-05
_Idqol11a_2	-7.9712e-07	-9.22031e-05	-0.000164887	-0.000191929	-0.000141767	-0.000204573	-0.000143743	-0.000202221	-2.75338e-05	5.45208e-05	-9.8954e-06	-0.000330473	-0.000472681	-0.000167255	-0.000150305	0.000265397	0.000470744	0.00012247	0.000590013	-0.000142291	7.47879e-05	0.000941381	0.00067327	9.55726e-05	-1.6236e-05	7.43335e-05	-5.50045e-05	8.44521e-06	-0.00017645	3.22521e-05	-0.00013937	-6.15104e-05	2.82597e-05	-0.000129033	-0.000142167	5.4918e-05	-7.43883e-05	-3.82463e-05	0.000139481	-0.000162186	7.54121e-05	-2.98324e-05	1.59598e-05	1.94635e-05	-5.07088e-05	-0.000114031	-4.1026e-05	-1.25184e-05	-3.17733e-05
_Idqol11a_3	-6.3949e-05	-0.000145586	-0.000233095	0.000101365	0.000189278	-0.000232862	-0.000195253	-0.000313994	-0.000496756	0.000448041	-0.000261375	-0.000166828	-0.000567993	-0.000340432	-0.000637543	0.000156777	0.000692259	0.000384932	0.000761776	-3.44786e-05	-6.72872e-05	0.00067327	0.00191818	-2.88882e-05	-0.00016456	-1.94875e-05	-0.000171652	-0.00028213	-0.000369996	9.02764e-05	0.000263477	8.63681e-05	-5.78894e-05	0.000100613	0.000178046	0.000113746	0.000113266	-8.28073e-06	-0.000121343	-0.000132305	-0.000256099	-0.0001534	-0.000749201	-0.000102431	-0.000340708	5.05149e-05	0.000207602	-4.07204e-05	1.05862e-05
_Idqol12a_2	9.37117e-05	9.07966e-06	-7.02922e-05	-0.000109328	-0.000265455	-0.000200934	-7.98759e-05	-3.57407e-05	5.87036e-05	-0.00018016	-0.000459146	6.82875e-05	0.000329344	-0.000148482	-7.60345e-05	0.000196655	0.000143331	-5.60075e-05	0.000122226	-0.00011431	-0.000350588	9.55726e-05	-2.88882e-05	0.00103728	0.00100221	8.38982e-05	-0.000109515	-1.13958e-05	1.26172e-05	-0.000185381	-0.000110614	-0.000211446	0.000135078	5.58908e-05	-1.90582e-05	-0.000295138	-0.000458396	-6.24246e-05	9.99061e-05	0.000254753	0.000437809	-6.95552e-05	-0.000343739	-0.000172693	-0.000153176	0.000157497	0.000109098	-9.34887e-06	-5.02848e-05
_Idqol12a_3	0.000162954	5.50576e-05	-0.0002389	-1.57194e-06	-0.000152133	-6.96885e-05	0.00014132	0.000607937	-0.000128529	-0.000216025	-7.89019e-05	0.000153367	0.000533191	4.49041e-05	0.000219539	0.000129186	-4.70906e-05	-0.000354585	-0.000450607	-0.000260416	-0.000683123	-1.6236e-05	-0.00016456	0.00100221	0.00192551	8.47809e-05	-0.000265306	0.000212609	0.000339748	-0.000296041	-6.95395e-05	-0.00014243	9.75507e-05	-0.000176932	-0.000405269	-0.000461329	-0.000570472	-0.000143903	2.78162e-05	0.00034739	0.00035657	-7.87049e-05	-0.000176329	-0.000450941	-0.00045955	0.000154821	0.000113054	-4.42664e-05	-9.97368e-06
_Idqol13a_2	-2.10212e-06	3.72013e-05	4.76236e-05	-0.000127457	-0.000136095	1.24837e-05	0.000198873	0.000423014	-0.000521911	-0.000201314	0.000351932	-0.000114777	0.000121937	-0.000139518	-0.00015667	0.000163207	0.000281447	2.52957e-05	8.13072e-05	-9.4989e-06	7.23812e-06	7.43335e-05	-1.94875e-05	8.38982e-05	8.47809e-05	0.000876953	0.0010365	-8.05367e-05	-0.000426935	-0.000288148	-0.000355273	-0.000242438	-0.000309497	-0.000173239	-0.000302248	-0.000189963	-0.00024225	-0.000103514	-0.000217036	4.66724e-05	0.000314743	-1.48418e-05	0.000445493	5.76254e-05	0.000212833	7.08756e-05	-1.84119e-05	3.23194e-05	-3.21655e-05
_Idqol13a_3	4.03122e-05	1.17372e-05	0.000308051	-6.5637e-05	-0.000197236	0.000120503	0.00031352	0.000490225	-0.000923158	-0.000177936	0.000182469	7.70842e-05	0.000432615	-0.00019658	-0.000438412	0.000131301	5.39021e-05	-0.000112518	-0.000248548	0.000288173	0.000390098	-5.50045e-05	-0.000171652	-0.000109515	-0.000265306	0.0010365	0.00270851	-0.000567945	-0.00130431	-0.000472042	-0.000586253	-0.000199586	-0.000371884	-0.000359621	-0.000674228	-0.000140498	-0.000183047	7.30303e-05	-0.000175448	-2.08631e-05	0.00039803	-9.64135e-05	0.000627519	0.000270634	0.00048628	-9.68511e-05	-0.000141562	5.65811e-05	-3.80523e-05
_Idqol14a_2	-2.71871e-06	-1.58314e-05	-4.05049e-05	-9.94379e-05	2.89819e-05	3.9358e-05	6.30372e-05	0.000167213	0.000666463	-0.000297724	-0.00030004	-5.43842e-05	0.000175636	0.000173707	0.000361112	2.87957e-06	-2.22414e-05	-0.000155981	-0.000277259	-0.00027155	-0.00028465	8.44521e-06	-0.00028213	-1.13958e-05	0.000212609	-8.05367e-05	-0.000567945	0.00082198	0.00109279	-1.85229e-05	-0.000139661	-2.38028e-05	-1.57153e-06	1.36442e-05	-3.30195e-05	-9.60015e-05	-0.000234663	-0.000137244	-3.20889e-05	5.5116e-05	-7.97666e-05	0.000154472	-3.96006e-05	-0.000169569	-9.62545e-05	-3.88798e-05	3.7216e-05	-1.4172e-05	1.4655e-05
_Idqol14a_3	-4.59209e-05	-2.12009e-05	-0.000117207	-4.31646e-05	0.000201478	0.000165486	0.000196648	3.62734e-06	0.0012958	0.000215478	0.000343856	-0.00010181	-3.52569e-05	0.000308666	0.000571661	-0.00023743	-0.000148737	-0.000209323	-0.000743806	-0.000531315	-0.000759324	-0.00017645	-0.000369996	1.26172e-05	0.000339748	-0.000426935	-0.00130431	0.00109279	0.00286353	0.00040955	0.000675852	2.17784e-05	6.34026e-05	-0.000222432	-0.000906347	0.000115763	0.00034445	-0.000205638	-0.000243487	-6.41999e-06	-0.000932021	8.2985e-05	-0.000359787	-0.000453305	-0.000615297	0.000198335	0.000168105	-4.59081e-05	4.67631e-05
_Idqol15a_2	1.08201e-05	0.000187053	-4.21553e-06	0.000178367	0.000272373	-2.34628e-05	-0.000403715	-5.86263e-05	0.000623712	0.000800791	0.0017076	-0.00017224	-0.000557712	9.10634e-05	0.000271272	-0.000433068	-0.000569871	6.6269e-05	0.000109163	-0.000198705	-0.000151014	3.22521e-05	9.02764e-05	-0.000185381	-0.000296041	-0.000288148	-0.000472042	-1.85229e-05	0.00040955	0.00180307	0.00277876	-6.35261e-05	-0.000219302	-0.000715448	-0.00102019	0.000570044	0.00117111	-7.79093e-05	-0.000145641	-0.000554174	-0.00164627	1.20756e-05	-0.000306127	2.98385e-05	9.40602e-06	-2.53306e-05	7.23174e-05	-4.71137e-05	-1.95804e-05
_Idqol15a_3	9.7404e-06	0.000605764	-0.000119516	-6.20004e-06	0.000318737	0.000328792	-0.000112502	0.000185836	0.000198138	0.00119032	0.00366163	8.5976e-05	-0.000435762	0.000344509	0.000446266	-0.000860841	-0.0014937	1.01104e-05	-6.99392e-05	-0.00033385	-0.000993003	-0.00013937	0.000263477	-0.000110614	-6.95395e-05	-0.000355273	-0.000586253	-0.000139661	0.000675852	0.00277876	0.00716795	3.1832e-05	-0.000249621	-0.000851466	-0.00116682	0.0010016	0.0022951	-0.000550532	-0.00103277	-0.000748752	-0.00337193	-0.000147893	-0.00124243	-0.0005655	-0.000282959	0.000436096	0.000293473	-0.000111831	2.56835e-06
_Idqol16a_2	-5.56379e-05	5.74045e-05	7.57983e-05	-5.16812e-05	-0.000111816	-5.20856e-05	0.000127402	-0.000299996	-0.000284435	0.000271434	-0.000115718	-4.92417e-05	-0.000347223	3.61273e-05	0.000114014	-0.000207277	-0.000413194	-0.000196089	-0.000398111	6.59115e-05	0.000115967	-6.15104e-05	8.63681e-05	-0.000211446	-0.00014243	-0.000242438	-0.000199586	-2.38028e-05	2.17784e-05	-6.35261e-05	3.1832e-05	0.000719383	0.000550251	0.000186799	0.000429456	-3.76479e-05	-0.000119598	0.000106753	8.33673e-05	4.55209e-05	-3.8279e-05	9.46991e-07	-9.0427e-05	-9.62009e-05	-0.000126091	-3.42889e-05	6.71608e-05	2.90419e-06	1.39424e-05
_Idqol16a_3	1.50197e-05	-4.62297e-05	0.000156409	-0.000380541	-0.00064145	-0.000192087	-0.000172282	-0.000243016	-0.000303978	-0.000273421	-0.00119161	7.91624e-05	-0.000342654	3.96284e-05	-0.000139313	-0.000115598	-0.000595374	-6.21486e-05	-3.8684e-05	0.000228877	-7.23389e-05	2.82597e-05	-5.78894e-05	0.000135078	9.75507e-05	-0.000309497	-0.000371884	-1.57153e-06	6.34026e-05	-0.000219302	-0.000249621	0.000550251	0.00172066	0.000550077	0.00129994	-0.000115921	-0.000633115	0.000194435	0.000309497	0.00012906	0.000619749	-9.72151e-05	-1.88269e-05	-0.000272326	-0.000534636	-6.20026e-05	0.000188623	5.4205e-05	-5.29882e-05
_Idqol17a_2	-2.30673e-05	-0.000296269	-1.43198e-05	-0.000272912	-0.00059882	-2.91174e-05	9.42214e-05	-0.000556895	0.000726428	-0.000822106	-0.00236409	0.000130906	2.91516e-05	-1.86583e-05	-0.000327202	0.000211725	-0.000131034	0.000323602	0.000397817	5.12625e-05	-6.83734e-05	-0.000129033	0.000100613	5.58908e-05	-0.000176932	-0.000173239	-0.000359621	1.36442e-05	-0.000222432	-0.000715448	-0.000851466	0.000186799	0.000550077	0.00231365	0.00398582	-0.000183917	-0.000898133	0.000108353	0.000292687	0.000411852	0.00111297	0.000188348	-0.000196239	-0.000175139	-0.000242189	-7.45597e-05	-5.25654e-05	-5.47312e-06	-3.22089e-05
_Idqol17a_3	1.5118e-05	-0.000349871	-0.000228388	-0.00103581	-0.00154638	-0.000139856	-0.00040072	-0.000507799	0.000168252	-0.000982261	-0.00251996	0.000268373	-0.000248686	0.000130981	-0.000747303	0.000197309	-0.000594168	0.000556515	0.000681118	0.000180901	-0.00058563	-0.000142167	0.000178046	-1.90582e-05	-0.000405269	-0.000302248	-0.000674228	-3.30195e-05	-0.000906347	-0.00102019	-0.00116682	0.000429456	0.00129994	0.00398582	0.011804	8.16676e-06	-0.00130668	0.00033649	0.00173038	0.000640786	0.00200393	0.000448255	-2.1102e-05	-0.000158401	0.00019399	-0.000417932	-4.8633e-05	-5.13874e-05	-0.000194275
_Idqol18a_2	2.00588e-05	9.07469e-05	-4.02374e-06	-4.90188e-05	0.000192192	-8.34336e-07	-0.000255018	-0.000980855	0.000184494	0.000483728	0.00106814	9.91647e-06	-0.000189924	0.000108952	1.76438e-05	-0.000107566	-0.000113999	7.01049e-05	5.79799e-05	-0.000152713	-0.000158874	5.4918e-05	0.000113746	-0.000295138	-0.000461329	-0.000189963	-0.000140498	-9.60015e-05	0.000115763	0.000570044	0.0010016	-3.76479e-05	-0.000115921	-0.000183917	8.16676e-06	0.000940042	0.00131578	-7.56823e-05	-0.000107932	-0.000275752	-0.000829834	6.98263e-05	7.29944e-05	4.95207e-06	-3.87545e-05	-7.87233e-05	1.27717e-05	-5.44712e-06	1.6228e-05
_Idqol18a_3	-2.21903e-05	0.000377404	0.000138868	0.000183092	0.000664657	0.000282112	-0.000271095	-0.00119632	0.000311225	0.000960629	0.00295595	-2.08991e-05	-0.000181433	9.98251e-05	0.000125095	-0.000290894	-0.000115558	1.48278e-05	-0.000433882	-0.000422093	-0.000275749	-7.43883e-05	0.000113266	-0.000458396	-0.000570472	-0.00024225	-0.000183047	-0.000234663	0.00034445	0.00117111	0.0022951	-0.000119598	-0.000633115	-0.000898133	-0.00130668	0.00131578	0.00326268	1.95768e-05	-0.000485753	-0.000819766	-0.00266462	-0.000114972	-2.34767e-05	-4.32674e-06	5.68303e-05	1.18987e-05	-0.000144131	-1.72059e-05	6.32053e-05
_Idqol19a_2	8.8357e-05	-0.00013193	5.21246e-05	-9.91819e-06	-0.000155995	-5.4542e-05	-0.000175587	5.68872e-05	8.65319e-05	0.000201834	0.000285439	-6.89205e-05	-0.000140762	-2.61548e-05	5.15557e-05	-0.000124658	-0.000409347	-3.4777e-05	-0.000164343	0.000162393	0.000571797	-3.82463e-05	-8.28073e-06	-6.24246e-05	-0.000143903	-0.000103514	7.30303e-05	-0.000137244	-0.000205638	-7.79093e-05	-0.000550532	0.000106753	0.000194435	0.000108353	0.00033649	-7.56823e-05	1.95768e-05	0.00100453	0.00112597	-0.000155344	-7.5014e-06	-0.000175317	0.00020298	-3.8781e-05	-0.00016229	-0.000198825	-0.000159252	-9.76805e-06	-1.54148e-05
_Idqol19a_3	0.000203333	-2.17014e-05	7.40304e-06	-0.000230431	-0.000305942	-0.000271576	-0.000603553	0.00031156	-8.98904e-05	0.000489297	0.0004681	0.00025537	0.000296309	-1.1924e-06	-6.38117e-05	-0.000538903	-0.000969895	8.92684e-05	9.7412e-05	0.00033459	0.000318729	0.000139481	-0.000121343	9.99061e-05	2.78162e-05	-0.000217036	-0.000175448	-3.20889e-05	-0.000243487	-0.000145641	-0.00103277	8.33673e-05	0.000309497	0.000292687	0.00173038	-0.000107932	-0.000485753	0.00112597	0.00291235	-2.0845e-05	0.000265948	-0.000157078	0.00010304	-0.000130422	-0.000312047	-0.000397548	-0.000161924	8.69875e-06	-7.42822e-05
_Idqol20a_2	7.2956e-06	-0.000136756	-4.54684e-05	-0.000111917	-0.000225433	-0.000130834	2.02988e-05	-7.08933e-05	-0.000475275	-0.000466817	-0.00135405	0.000135145	0.00022926	1.08742e-05	-1.23734e-05	0.000116847	0.000149872	-6.80068e-06	2.69475e-05	9.16096e-07	-0.000375865	-0.000162186	-0.000132305	0.000254753	0.00034739	4.66724e-05	-2.08631e-05	5.5116e-05	-6.41999e-06	-0.000554174	-0.000748752	4.55209e-05	0.00012906	0.000411852	0.000640786	-0.000275752	-0.000819766	-0.000155344	-2.0845e-05	0.00106357	0.00175554	-6.34697e-05	-0.000267095	-0.000285208	-0.000326485	0.000129721	0.00012881	1.1543e-05	1.24454e-05
_Idqol20a_3	4.86722e-05	-0.000703519	-0.000362135	-0.000376643	-0.00076027	-0.000549135	-0.000236772	0.000859126	-0.00094679	-0.00163874	-0.00396177	-3.85505e-05	-0.000175928	-6.31194e-05	-0.000183142	0.000790587	0.000862022	5.34099e-05	0.000707997	0.000370279	2.66969e-05	7.54121e-05	-0.000256099	0.000437809	0.00035657	0.000314743	0.00039803	-7.97666e-05	-0.000932021	-0.00164627	-0.00337193	-3.8279e-05	0.000619749	0.00111297	0.00200393	-0.000829834	-0.00266462	-7.5014e-06	0.000265948	0.00175554	0.00556818	5.94299e-05	0.00051646	8.0715e-05	-0.000242884	1.66237e-05	0.000148962	1.77567e-05	-4.80853e-05
_Idqol21a_2	-3.91037e-05	-9.78798e-05	-0.000159372	-5.3899e-05	4.3166e-06	-1.98615e-05	-0.000118931	-0.000209121	0.000507728	-0.000360186	-0.000499058	-0.000126597	-0.000110628	0.000118429	0.000185986	1.52828e-05	-0.00019974	-2.19169e-05	-2.91996e-05	-9.85364e-05	2.92611e-05	-2.98324e-05	-0.0001534	-6.95552e-05	-7.87049e-05	-1.48418e-05	-9.64135e-05	0.000154472	8.2985e-05	1.20756e-05	-0.000147893	9.46991e-07	-9.72151e-05	0.000188348	0.000448255	6.98263e-05	-0.000114972	-0.000175317	-0.000157078	-6.34697e-05	5.94299e-05	0.000770166	0.000874407	7.62379e-05	0.000181034	-0.000169416	-8.45877e-05	-3.32179e-05	-1.39716e-06
_Idqol21a_3	3.87391e-05	-0.00010942	-0.000444297	-0.000189153	-0.000176163	3.65679e-05	0.000148028	0.000149006	-0.000248519	-0.000463169	0.00116451	-0.000518848	-0.000754225	-2.5755e-05	-0.000213532	0.000141639	-0.000297219	-1.28912e-05	0.000129073	0.000296263	0.000527284	1.59598e-05	-0.000749201	-0.000343739	-0.000176329	0.000445493	0.000627519	-3.96006e-05	-0.000359787	-0.000306127	-0.00124243	-9.0427e-05	-1.88269e-05	-0.000196239	-2.1102e-05	7.29944e-05	-2.34767e-05	0.00020298	0.00010304	-0.000267095	0.00051646	0.000874407	0.00437343	0.000353232	0.000513222	-0.000644102	-0.000637855	-2.47514e-05	-1.55887e-05
_Idqol22a_2	-3.02347e-05	-0.000235734	-0.000313997	8.09547e-05	8.23562e-06	-8.41061e-05	-2.02471e-06	-0.000113769	0.000539795	-0.000392747	-0.000358967	6.86094e-06	5.15519e-05	-0.000103062	-4.88506e-05	0.000223731	0.000473915	2.98881e-05	0.000370793	-3.63729e-05	0.000147309	1.94635e-05	-0.000102431	-0.000172693	-0.000450941	5.76254e-05	0.000270634	-0.000169569	-0.000453305	2.98385e-05	-0.0005655	-9.62009e-05	-0.000272326	-0.000175139	-0.000158401	4.95207e-06	-4.32674e-06	-3.8781e-05	-0.000130422	-0.000285208	8.0715e-05	7.62379e-05	0.000353232	0.00105635	0.00107572	-0.000149481	-0.000254594	-2.35774e-05	-3.38153e-05
_Idqol22a_3	-2.27951e-05	-1.70569e-05	-0.000139356	2.72761e-05	5.15714e-05	2.17315e-05	-3.36459e-05	-1.39065e-05	0.000283715	-0.000914211	-0.00046415	0.000129354	0.000455278	1.55546e-05	0.00016538	0.000199469	0.000122722	-0.00010138	3.56035e-05	-7.694e-05	-8.11163e-05	-5.07088e-05	-0.000340708	-0.000153176	-0.00045955	0.000212833	0.00048628	-9.62545e-05	-0.000615297	9.40602e-06	-0.000282959	-0.000126091	-0.000534636	-0.000242189	0.00019399	-3.87545e-05	5.68303e-05	-0.00016229	-0.000312047	-0.000326485	-0.000242884	0.000181034	0.000513222	0.00107572	0.00208787	-0.000125658	-0.00025951	-3.26618e-06	-3.4612e-05
_Idqol23a_2	-4.99734e-05	0.000184057	0.000137546	-3.53888e-05	3.73169e-05	-8.09926e-05	-0.000103536	0.000464051	0.00012055	-1.49553e-05	0.000128829	-2.39932e-05	-6.2249e-05	-1.70669e-05	0.000151878	-0.000160689	3.9645e-05	-2.89085e-05	-6.50793e-05	3.50875e-05	-0.000167165	-0.000114031	5.05149e-05	0.000157497	0.000154821	7.08756e-05	-9.68511e-05	-3.88798e-05	0.000198335	-2.53306e-05	0.000436096	-3.42889e-05	-6.20026e-05	-7.45597e-05	-0.000417932	-7.87233e-05	1.18987e-05	-0.000198825	-0.000397548	0.000129721	1.66237e-05	-0.000169416	-0.000644102	-0.000149481	-0.000125658	0.000752611	0.000519838	1.91793e-05	1.20776e-05
_Idqol23a_3	-4.00108e-06	0.00012678	0.000229438	7.68366e-05	0.000149258	-0.000226633	-0.000330491	4.11574e-05	0.000105192	0.000198057	-3.9028e-05	1.24589e-05	-0.0003991	-2.2855e-05	-9.72847e-06	-0.000241629	-0.000246836	-2.60601e-05	-0.000163785	0.000178882	-5.40408e-05	-4.1026e-05	0.000207602	0.000109098	0.000113054	-1.84119e-05	-0.000141562	3.7216e-05	0.000168105	7.23174e-05	0.000293473	6.71608e-05	0.000188623	-5.25654e-05	-4.8633e-05	1.27717e-05	-0.000144131	-0.000159252	-0.000161924	0.00012881	0.000148962	-8.45877e-05	-0.000637855	-0.000254594	-0.00025951	0.000519838	0.0011683	2.95809e-05	2.23414e-05
dqolwi1	3.61246e-07	0.000124898	0.000275919	-3.26957e-05	-3.62015e-05	-1.01483e-05	-5.33429e-05	-6.98304e-05	-9.0516e-05	-4.94133e-05	-9.24854e-05	3.9312e-05	1.8454e-05	1.15231e-05	2.16227e-05	-3.56204e-05	-5.56395e-05	-1.85168e-05	-7.92466e-05	3.26002e-05	1.44387e-05	-1.25184e-05	-4.07204e-05	-9.34887e-06	-4.42664e-05	3.23194e-05	5.65811e-05	-1.4172e-05	-4.59081e-05	-4.71137e-05	-0.000111831	2.90419e-06	5.4205e-05	-5.47312e-06	-5.13874e-05	-5.44712e-06	-1.72059e-05	-9.76805e-06	8.69875e-06	1.1543e-05	1.77567e-05	-3.32179e-05	-2.47514e-05	-2.35774e-05	-3.26618e-06	1.91793e-05	2.95809e-05	5.96404e-05	-5.12755e-06
dqolwi2	-1.96178e-05	-8.65674e-06	-2.38171e-05	8.96526e-05	0.000250016	4.77114e-05	5.39124e-05	5.74279e-05	6.59817e-05	-1.79847e-05	4.9287e-05	2.20908e-05	5.17834e-05	3.18686e-05	5.08206e-05	-2.25975e-05	2.07649e-05	-2.27092e-05	-9.86935e-05	-1.4569e-05	-1.20708e-05	-3.17733e-05	1.05862e-05	-5.02848e-05	-9.97368e-06	-3.21655e-05	-3.80523e-05	1.4655e-05	4.67631e-05	-1.95804e-05	2.56835e-06	1.39424e-05	-5.29882e-05	-3.22089e-05	-0.000194275	1.6228e-05	6.32053e-05	-1.54148e-05	-7.42822e-05	1.24454e-05	-4.80853e-05	-1.39716e-06	-1.55887e-05	-3.38153e-05	-3.4612e-05	1.20776e-05	2.23414e-05	-5.12755e-06	5.15012e-05
dqolwi3	1.18388e-05	-1.45428e-06	-2.19837e-05	-6.36745e-06	-3.62438e-05	4.22131e-05	0.000154401	1.49853e-05	-0.000113779	0.000145329	0.000182974	1.71755e-05	8.48593e-05	-3.38105e-05	-5.50212e-05	1.01913e-05	-3.21934e-05	-3.12822e-05	-2.94796e-05	2.5462e-06	2.78686e-06	-8.03009e-06	-3.51992e-05	2.95155e-05	5.28146e-05	2.51552e-05	5.13929e-05	2.27227e-07	4.71837e-06	-5.2408e-05	-3.03593e-05	3.42942e-06	4.78644e-06	2.73943e-05	6.44543e-05	-2.89677e-05	-5.87069e-05	9.716e-06	2.90054e-05	1.2631e-05	1.59309e-05	-2.43399e-05	1.93307e-05	-3.12014e-05	-6.55003e-05	-8.0101e-06	-2.93363e-05	-9.25702e-06	-7.9528e-06
dqolwi4	-2.69982e-05	-9.82403e-05	-0.000127218	-1.53282e-05	4.80708e-05	-2.10034e-05	-4.10479e-05	-0.000157569	0.00209633	-0.000163714	4.04933e-05	-5.22342e-05	-4.3334e-05	5.09601e-05	6.10465e-05	4.82147e-05	3.06781e-05	8.51284e-05	5.48228e-06	-0.000153084	-6.5755e-05	-6.52553e-05	-0.000104279	-5.62111e-05	-9.51964e-05	-9.89032e-05	-0.000185934	0.000143003	0.000185074	3.67223e-05	-9.86379e-05	-2.67653e-05	-5.61527e-05	0.000336893	0.000643062	8.9299e-05	0.000108371	6.56283e-05	3.80225e-05	-6.85869e-05	-0.000181029	0.000177841	0.000160585	0.000122908	0.00015971	-8.9344e-05	-4.53128e-05	-2.3606e-05	3.38943e-05
dqolwi5	2.32032e-05	0.000167258	-0.000111292	3.09473e-05	0.000217138	4.61307e-05	7.05045e-05	3.94626e-05	0.00019882	0.00116137	0.00295931	-7.01346e-05	-4.94984e-05	3.46183e-05	3.10824e-05	-0.000114139	9.6811e-05	-2.98629e-05	-4.16773e-05	-7.50858e-05	-1.20811e-05	-4.88207e-06	-2.32035e-05	-3.53842e-05	3.55595e-05	6.72697e-05	3.02055e-05	-3.92634e-05	6.68825e-05	0.000272077	0.000616856	-4.30499e-05	-0.000217882	-0.000402065	-0.000475212	0.00015856	0.000432554	1.72461e-05	5.16209e-05	-0.000185819	-0.000588399	-9.66331e-05	0.000101132	-3.94034e-05	-5.00681e-05	5.02152e-05	1.88836e-05	-1.98665e-05	1.12604e-05
dqolwi6	1.42168e-05	7.99579e-05	8.37117e-05	6.48584e-05	0.000138399	4.44461e-05	1.37281e-05	6.38905e-05	-0.000115406	-0.000103701	-0.000188161	0.000435371	0.000963741	1.15145e-05	-1.8702e-05	-0.00010232	-0.000236888	-0.000125853	-0.000267851	-6.1958e-05	-0.000141657	-9.62561e-05	-5.43929e-05	3.11513e-05	6.11247e-05	-1.26926e-05	2.02542e-05	2.60886e-05	2.21449e-06	-5.90523e-05	6.66405e-06	-1.03303e-05	-6.59092e-05	3.1737e-05	7.67156e-05	3.73774e-07	3.11899e-05	-2.00075e-05	8.80132e-05	3.02282e-05	-0.000125226	9.65653e-06	-0.000186329	-3.14558e-05	4.1366e-05	-1.64459e-05	-3.38518e-05	5.45886e-06	1.17969e-05
dqolwi7	-4.52175e-06	1.66546e-05	3.48238e-05	-2.84215e-05	3.64747e-06	2.9849e-05	-2.02235e-05	9.33983e-05	8.79691e-05	-6.0526e-05	7.32375e-05	-5.75846e-05	-0.000118254	0.000168381	0.000387946	-9.0367e-06	-0.000121526	-0.000102407	-0.000147773	-2.88264e-05	2.30009e-05	-7.50834e-06	-0.000106996	-2.22557e-05	1.30888e-05	-2.63218e-05	-1.00572e-05	2.4587e-05	4.39071e-05	4.82194e-05	8.18117e-05	1.12842e-05	9.64133e-06	-5.13909e-05	-9.67476e-05	1.70625e-05	3.45449e-05	3.38331e-05	9.60844e-06	-3.25464e-05	-2.99692e-05	1.81015e-05	2.86565e-05	-6.3371e-06	2.26823e-05	7.44962e-06	-2.00524e-05	3.70414e-06	3.83346e-06
dqolwi8	-7.99054e-06	-9.94485e-05	-0.00017391	4.00812e-06	-2.23193e-05	-1.37635e-05	5.66108e-05	5.08491e-05	-3.38192e-05	2.09397e-05	9.71451e-05	-0.000110028	-7.77746e-05	-5.66959e-05	-0.000135069	0.000292958	0.000743954	1.827e-05	0.00013878	4.01942e-06	2.6914e-05	7.94456e-05	8.65131e-05	8.22638e-06	-3.18174e-05	5.50185e-05	6.2035e-05	-2.96555e-05	-9.81552e-05	-0.000105215	-0.000276234	-6.06521e-05	-7.69623e-05	5.55331e-06	5.18188e-05	-2.15318e-05	-6.10338e-05	-4.55442e-06	-6.91746e-05	1.78329e-05	0.000223349	-3.82234e-05	7.04581e-05	0.00010597	5.40311e-05	-3.52467e-05	-7.62194e-05	-1.77491e-05	-6.03835e-06
dqolwi9	-6.03857e-06	-6.89758e-05	-0.000123789	-1.06144e-05	-4.14441e-05	-4.12528e-05	-6.69366e-05	-3.96642e-05	-1.84101e-05	1.1419e-05	1.45111e-05	-0.000107279	-0.000218297	-0.000103221	-0.000211419	2.93641e-05	0.000172537	0.000246359	0.000506544	-3.15623e-06	-2.00029e-05	0.000102767	0.000153681	1.53292e-05	-3.65694e-05	9.06688e-06	-5.70594e-05	-4.54219e-05	-9.53971e-05	4.5482e-05	5.58064e-05	-6.7653e-05	-5.52202e-05	8.96665e-06	-2.58718e-06	9.96789e-06	5.65265e-06	-4.29563e-05	-3.13217e-05	-2.08168e-05	9.09765e-06	-5.11425e-06	1.60599e-05	4.79153e-05	2.1534e-05	1.23213e-05	-1.96322e-05	-1.60215e-05	-9.59033e-06
dqolwi10	-6.05926e-06	3.2512e-07	5.24953e-05	1.15629e-05	-7.16613e-06	-2.67459e-05	3.01549e-05	-7.24038e-05	2.29447e-05	8.43322e-05	-2.78369e-05	-0.000112799	-0.000177151	-3.3807e-05	-4.42498e-05	-4.07317e-06	2.73977e-05	1.61244e-05	1.9113e-05	0.00013744	0.00037334	2.23875e-05	3.03826e-05	-5.50009e-05	-0.000107454	5.04058e-06	6.08415e-05	-3.11009e-05	-8.6321e-05	-5.57362e-05	-0.000174626	2.16585e-05	-3.94566e-05	-1.30363e-05	-0.000167535	-2.77231e-05	-6.13043e-05	5.52606e-05	-3.00504e-05	-3.22607e-05	1.43753e-05	1.27446e-05	4.81851e-05	1.27652e-05	-9.68116e-06	-5.7626e-06	8.74959e-06	2.72098e-06	5.19445e-06
dqolwi11	-1.95337e-05	2.83643e-05	1.09427e-05	-1.34431e-05	2.61026e-05	-1.88416e-05	-3.63691e-05	-6.22359e-05	-7.99128e-05	7.28792e-05	-3.04396e-05	-1.77352e-05	-0.000141617	-3.83436e-05	-8.09566e-05	-2.56378e-05	0.000108909	9.14232e-05	0.000123694	-1.03641e-05	-7.61704e-05	0.000105678	0.000312346	4.39008e-06	2.10775e-06	-2.33072e-05	-0.000116113	-2.24248e-05	2.83697e-05	4.79705e-05	0.000179546	1.9306e-05	3.66848e-05	-2.65837e-08	-4.46158e-05	2.55859e-05	5.70377e-05	-5.03832e-05	-7.13984e-05	-1.11333e-05	-0.000131154	-5.87858e-05	-0.000259823	-8.44726e-05	-0.00012856	7.24911e-05	8.46474e-05	4.91615e-06	6.91048e-06
dqolwi12	2.08136e-05	5.5627e-06	-3.0604e-05	1.0683e-06	-1.79736e-05	-2.6422e-06	2.66974e-05	-3.8277e-05	0.000132915	-7.49148e-05	-4.4775e-05	4.82049e-05	0.000110649	5.13679e-06	3.30658e-05	3.54827e-05	-2.20647e-05	-6.64773e-05	-8.92441e-05	-5.08495e-05	-0.000121112	-2.38681e-07	-4.11476e-05	8.99639e-05	0.000175732	-6.30145e-06	-3.02668e-05	3.99542e-05	6.66681e-05	-1.19108e-05	2.76877e-05	-1.07927e-05	1.69402e-05	-3.57019e-05	-7.1877e-05	-1.88411e-05	-7.93275e-06	-3.18975e-05	-3.60566e-05	2.11465e-05	-1.95451e-05	4.58129e-06	1.45716e-05	-6.2198e-06	2.60388e-05	-8.56821e-06	-2.80879e-07	-5.84845e-06	-2.18306e-06
dqolwi13	5.49965e-06	-3.22824e-05	1.91009e-05	-1.15228e-05	-3.25797e-05	7.23421e-06	7.13688e-05	9.20999e-05	-0.000108209	-6.84051e-05	-6.95523e-05	-1.23474e-05	4.37237e-05	-3.07353e-05	-5.906e-05	6.87819e-05	0.000100266	-4.63362e-05	-5.67117e-05	3.14877e-05	6.76496e-05	1.61793e-05	-3.16856e-05	-1.53905e-05	-3.14626e-05	0.000147482	0.000360972	-5.25852e-05	-0.000157842	-0.000102032	-0.000222254	-2.32002e-05	-1.82404e-05	-2.81183e-05	-9.18721e-05	-4.73772e-05	-0.000112069	2.14136e-05	-2.5561e-05	1.85033e-05	0.00018603	-5.56244e-06	0.000134937	5.28299e-05	5.08657e-05	-4.44287e-05	-2.97982e-05	7.9905e-06	-4.68258e-06
dqolwi14	-5.87743e-06	3.02574e-06	-3.89937e-05	7.78955e-06	4.55806e-05	-1.08776e-05	-2.95479e-05	3.23609e-05	0.000268352	3.48923e-05	0.00010352	-6.95999e-06	6.72042e-06	4.43917e-05	9.79436e-05	-4.68677e-05	-2.39787e-05	-2.31778e-06	-4.4406e-05	-8.46379e-05	-8.02362e-05	-1.32698e-05	-1.55831e-05	1.55659e-05	4.57647e-05	-5.23546e-05	-0.000212218	0.000145793	0.000376225	0.000106726	0.000129967	-1.89573e-05	-4.24391e-05	-8.92278e-05	-0.000185078	1.3542e-05	7.57914e-05	-2.80643e-05	-1.73748e-05	-4.8863e-05	-0.000214432	3.26195e-05	-6.57106e-05	-1.73249e-05	-1.10373e-05	3.20597e-05	8.61562e-06	-1.14782e-05	-1.35289e-06
dqolwi15	1.02492e-05	0.00010917	-2.97179e-05	-2.97322e-05	1.71112e-05	5.34013e-05	-6.50476e-05	-2.26293e-05	0.00012538	0.000294619	0.000739458	-2.59705e-05	-0.000188136	8.41425e-05	9.70135e-05	-0.000200718	-0.000371719	-2.65987e-05	-7.00226e-05	-5.34493e-05	-0.000187618	-3.29908e-05	-1.73109e-05	-4.64152e-05	-2.87575e-05	-0.000135201	-0.000198944	3.26892e-05	0.000288624	0.000634622	0.00144264	3.07472e-05	4.26734e-05	-0.000204925	-0.000227637	0.000247835	0.000510494	-8.02292e-05	-0.000136799	-0.000175456	-0.000693244	-9.17154e-06	-0.000147901	-0.00013081	-9.55573e-05	4.60944e-05	7.27607e-05	-2.53377e-05	-6.94136e-06
dqolwi16	-1.95276e-06	2.15195e-06	2.92658e-05	-3.7048e-05	-8.50283e-05	-1.77943e-05	-3.11415e-05	-4.76014e-05	-4.33473e-05	-1.75847e-05	-0.000174689	2.50394e-05	-3.22906e-05	-1.16166e-05	-2.48912e-05	-2.65741e-05	-9.9881e-05	1.09206e-05	5.6846e-06	2.09788e-05	-5.77323e-05	-2.26255e-05	-1.28951e-05	3.86403e-05	3.78976e-05	-4.60542e-05	-7.35571e-05	2.24677e-06	3.71322e-05	-3.66705e-05	8.71052e-06	6.66982e-05	0.000216094	9.41759e-05	0.00018575	-3.51705e-05	-8.84917e-05	1.40149e-05	2.62661e-05	4.52447e-05	7.49542e-05	-2.72965e-05	-7.09732e-05	-6.12534e-05	-9.39365e-05	2.74812e-05	4.16461e-05	6.41643e-06	-6.76981e-06
dqolwi17	-1.47831e-06	-8.20941e-05	-1.22529e-05	-8.98262e-05	-0.000206018	2.96697e-05	5.9433e-05	-9.79358e-06	0.000145124	-0.000289137	-0.000662026	5.50952e-05	0.000136447	-1.63033e-05	-9.90785e-05	0.000105776	5.49672e-06	-1.7329e-06	-3.14452e-05	-9.53146e-06	-5.16731e-05	-4.53242e-05	-3.67866e-05	1.98467e-05	-2.37199e-05	-1.45909e-05	-1.99777e-05	1.24682e-05	-0.000131749	-0.000256911	-0.000351586	5.02552e-05	0.000129769	0.00063655	0.00158459	-6.42042e-05	-0.000241291	4.31451e-05	0.000149799	0.000103207	0.000302294	6.48208e-05	-1.08631e-05	1.12638e-05	7.69643e-05	-6.83925e-05	-8.29466e-05	-8.68755e-06	-2.34265e-05
dqolwi18	7.94265e-06	3.36425e-05	6.35466e-06	4.14398e-05	0.000123615	1.47948e-05	-7.16384e-05	8.77108e-06	-1.78208e-05	9.40327e-05	0.000358171	2.37947e-05	-5.23403e-07	3.06477e-05	4.90729e-05	-6.72674e-05	-0.000109954	-3.56407e-05	-7.6059e-05	-2.54708e-05	9.48644e-06	-8.50421e-07	9.65601e-06	-5.85519e-05	-6.40311e-05	-5.107e-05	-3.60897e-05	-2.99247e-05	1.97889e-05	0.000175388	0.000268135	-4.39209e-06	-5.15087e-05	-0.000127987	-0.00011882	0.000142092	0.000349541	5.68868e-05	5.35695e-05	-0.000142019	-0.000311391	-5.06599e-06	3.26941e-05	3.47895e-05	3.11691e-05	-3.58296e-05	-1.47202e-05	-6.088e-06	7.07388e-06
dqolwi19	1.06741e-05	-3.49797e-06	-1.0742e-06	-3.5897e-05	-4.43167e-05	-4.46814e-05	-9.5166e-05	-1.76189e-05	-4.56419e-05	0.000121389	0.000105359	2.91389e-05	-3.75013e-06	1.18712e-05	1.28294e-05	-8.25718e-05	-9.42801e-05	6.64305e-05	0.000109515	4.02735e-05	3.15086e-05	4.15282e-06	-5.61726e-06	-2.17427e-05	-4.59685e-05	-1.61857e-05	-3.70408e-05	-2.57433e-06	-5.06506e-05	-1.88294e-05	-0.000152824	1.01434e-05	1.16413e-05	5.48847e-05	0.00027059	-3.48578e-06	-8.94589e-05	9.68139e-05	0.000354691	1.71847e-05	6.78758e-05	-7.32933e-06	-2.43507e-05	-7.66661e-06	-5.57452e-05	-3.00999e-05	-6.70828e-06	5.46948e-06	-1.12013e-05
dqolwi20	1.92811e-05	-0.00010039	-3.10836e-05	-8.43727e-05	-0.000147629	-7.64394e-05	-7.78145e-05	7.13097e-05	-0.000219146	-0.000288509	-0.000681753	3.67107e-05	-3.65147e-07	4.91809e-06	-6.46518e-05	9.89723e-05	7.02265e-05	4.60791e-05	0.000158535	9.11304e-05	-4.74888e-05	1.65166e-05	-4.42755e-05	4.62339e-05	2.02489e-05	2.01031e-05	7.54533e-05	-2.71084e-05	-0.000176177	-0.000231073	-0.000441389	1.5757e-07	0.000149777	0.000216339	0.000471618	-8.58741e-05	-0.000399292	-1.53278e-05	9.08655e-05	0.000271033	0.000848899	8.57242e-06	0.000106733	6.06995e-07	-3.11162e-05	-1.86927e-05	4.18719e-05	1.08727e-05	-9.48748e-06
dqolwi21	-4.09372e-06	-3.7262e-05	-8.10828e-05	-4.93509e-06	-3.88962e-05	-6.09087e-06	1.6885e-05	-1.33458e-05	-6.61587e-05	-8.32266e-05	3.35889e-05	-0.000149748	-0.000236941	-5.4948e-05	-0.00012522	8.30694e-06	-3.63606e-05	3.38659e-05	5.67579e-05	5.68359e-05	0.000164026	1.06539e-05	-5.55328e-05	-7.49342e-05	-6.65751e-05	8.28403e-05	0.000149782	-4.41983e-05	-0.000109025	-3.64613e-05	-0.000250571	-1.33417e-06	-2.88305e-05	-4.19718e-05	-9.38375e-05	-2.15526e-06	3.0356e-05	5.29876e-05	-6.45504e-06	-6.24265e-05	5.60696e-05	0.000177063	0.000738347	7.47688e-05	8.3077e-05	-0.000115194	-0.000100887	-1.30701e-05	-4.61927e-06
dqolwi22	-2.12159e-05	1.66223e-05	1.95461e-05	3.51198e-05	3.81036e-05	4.85426e-05	6.86057e-05	6.0238e-05	3.34546e-05	-8.11585e-05	1.2591e-05	-5.01909e-06	0.000102893	-7.86698e-08	9.19156e-05	4.75741e-05	3.47595e-05	-5.83043e-05	-0.000107384	-6.53315e-05	-1.29133e-05	-4.02891e-05	-9.25387e-05	1.1628e-05	-7.12646e-06	5.90166e-05	7.61442e-05	-2.53473e-06	-5.61662e-05	-2.68621e-05	-3.73305e-05	-1.63341e-05	-0.000109225	-1.97716e-05	-1.49792e-05	-4.17741e-05	2.74031e-05	-3.18486e-05	-0.000114739	-2.47128e-05	-5.85028e-05	-2.23392e-06	-3.7933e-06	9.15001e-05	0.000231682	2.8164e-05	-3.84531e-05	-2.64225e-06	2.47366e-07
dqolwi23	-1.43741e-06	9.29747e-06	-4.33493e-06	1.82059e-05	4.23163e-05	-2.51991e-05	-1.07376e-05	7.40062e-05	3.013e-05	4.25093e-05	8.99292e-05	-1.80779e-05	-7.25204e-05	-1.7635e-05	-2.10492e-05	-1.27517e-05	2.32193e-05	6.17893e-06	3.56963e-06	2.5664e-05	1.09036e-05	1.08735e-05	6.38656e-05	1.69817e-05	2.38787e-05	2.71025e-05	1.7829e-05	-1.07732e-05	5.59606e-06	2.11906e-05	5.95296e-05	-8.30135e-06	7.51327e-07	-4.63794e-05	-0.000117372	-1.54363e-05	-1.3629e-05	-2.89678e-05	-7.57549e-05	-6.6101e-06	-8.54875e-06	-2.2985e-05	-7.58841e-05	-5.64219e-06	-1.0075e-06	6.50983e-05	0.000133846	-3.9643e-07	4.12466e-06
_cons	-0.000260019	-2.28244e-06	9.21074e-06	-0.000108789	7.02828e-06	7.99609e-05	6.56706e-05	0.00016979	9.05607e-05	-0.000173882	-0.000356524	-0.000114514	-0.000180517	7.72188e-05	0.000200906	4.38784e-05	0.000167241	-0.000125043	-0.000146366	-0.000105184	-0.000169464	4.15012e-05	0.000114724	-0.000325463	-0.000347885	-6.68169e-05	-8.559e-05	2.82916e-05	0.00012991	-3.97063e-05	-3.67169e-05	0.000149656	6.56784e-05	-3.95296e-05	-4.0243e-05	-9.96875e-05	-5.84199e-05	-0.000196698	-0.0003275	-1.60066e-05	-1.53104e-07	0.000110716	5.36664e-05	4.99475e-05	4.23823e-05	1.13345e-06	-6.10246e-05	-3.4827e-06	3.8173e-05
[truncated: 22 more columns]

## Sheet: SUR
		logitSUR_perfecthealth	logitSUR_perfecthealth	logitSUR_perfecthealth	logitSUR_perfecthealth	logitSUR_perfecthealth	logitSUR_perfecthealth	logitSUR_perfecthealth	logitSUR_perfecthealth	logitSUR_perfecthealth	logitSUR_perfecthealth	logitSUR_perfecthealth	logitSUR_perfecthealth	logitSUR_perfecthealth	logitSUR_perfecthealth	logitSUR_perfecthealth	logitSUR_perfecthealth	logitSUR_perfecthealth	logitSUR_perfecthealth	logitSUR_perfecthealth	logitSUR_perfecthealth	logitSUR_perfecthealth	logitSUR_perfecthealth	logitSUR_perfecthealth	logitSUR_perfecthealth	logitSUR_perfecthealth	logitSUR_perfecthealth	logitSUR_perfecthealth	logitSUR_perfecthealth	logitSUR_perfecthealth	logitSUR_perfecthealth	logitSUR_perfecthealth	logitSUR_perfecthealth	logitSUR_perfecthealth	logitSUR_perfecthealth	logitSUR_perfecthealth	logitSUR_perfecthealth	logitSUR_perfecthealth	logitSUR_perfecthealth	logitSUR_perfecthealth	logitSUR_perfecthealth	logitSUR_perfecthealth	logitSUR_perfecthealth	logitSUR_perfecthealth	logitSUR_perfecthealth	logitSUR_perfecthealth	logitSUR_perfecthealth	logitSUR_perfecthealth	logitSUR_perfecthealth
		_Idqol1a_2	_Idqol1a_3	_Idqol2a_2	_Idqol2a_3	_Idqol3a_2	_Idqol3a_3	_Idqol4a_2	_Idqol4a_3	_Idqol5a_2	_Idqol5a_3	_Idqol6a_2	_Idqol6a_3	_Idqol7a_2	_Idqol7a_3	_Idqol8a_2	_Idqol8a_3	_Idqol9a_2	_Idqol9a_3	_Idqol10a_2	_Idqol10a_3	_Idqol11a_2	_Idqol11a_3	_Idqol12a_2	_Idqol12a_3	_Idqol13a_2	_Idqol13a_3	_Idqol14a_2	_Idqol14a_3	_Idqol15a_2	_Idqol15a_3	_Idqol16a_2	_Idqol16a_3	_Idqol17a_2	_Idqol17a_3	_Idqol18a_2	_Idqol18a_3	_Idqol19a_2	_Idqol19a_3	_Idqol20a_2	_Idqol20a_3	_Idqol21a_2	_Idqol21a_3	_Idqol22a_2	_Idqol22a_3	_Idqol23a_2	_Idqol23a_3	dqolwi1	dqolwi2
logitSUR_perfecthealth	_Idqol1a_2	0.0976648	0.103777	-0.0161148	-0.0149203	-0.0162556	-0.015271	0.017818	0.0215625	0.0133132	0.044047	0.000597536	-0.00599274	0.00564754	0.0148689	-0.00899761	-0.00612521	-0.00781126	-0.0155109	-0.00412751	-0.0256634	-0.00291354	-0.00562016	-0.00185693	0.000109626	-0.00198082	0.0100391	-0.00299182	-0.00589579	-0.000608414	-0.00285036	0.0124149	0.0142898	0.00357122	-0.00472882	-0.00255407	0.00209661	-0.00918411	-0.00395396	-0.0147248	-0.0115291	-0.0101251	0.00805948	-0.00593602	-0.011238	-0.0113713	-0.0104277	0.0152613	-0.00305311
logitSUR_perfecthealth	_Idqol1a_3	0.103777	0.244682	-0.0206235	-0.0435951	-0.0138964	-0.0472857	-0.0128291	-0.0175437	0.0277657	0.0982033	-0.0280329	-0.074523	-0.000620134	0.0021143	-0.0263342	-0.0539898	-0.00235775	-0.0188724	-0.00375522	-0.0115005	0.000129777	-0.0281223	0.00101315	0.00130988	0.00506951	0.0232363	0.00398859	-0.000731943	-0.00635053	0.00479811	0.0108965	0.0254427	-0.017132	-0.0431931	-0.000973431	0.0135961	-0.00413984	-0.0136991	-0.0153792	-0.0307041	-0.0138813	0.0295445	-0.0136371	-0.0231191	-0.00959829	0.000684578	0.0323484	-0.00814613
logitSUR_perfecthealth	_Idqol2a_2	-0.0161148	-0.0206235	0.0953467	0.107572	-0.00710984	0.00302804	-0.0240755	0.00867477	0.00139113	-0.0070416	0.00595162	0.00383338	-0.0112447	-0.0209095	0.00562566	-0.000839343	-0.0164803	-0.0203231	-0.0052556	0.00686566	0.00144879	0.0122334	-0.00331082	-0.00633262	-0.0108905	-0.0288713	0.00357425	0.00612952	0.00792728	-0.00908443	-0.0063311	-0.00769462	-0.0305239	-0.0723943	-0.00342267	-0.00214313	-0.00213824	-0.01097	0.00366435	-0.00528352	-0.0129688	-0.00993574	0.01057	0.0157133	-0.00272104	-0.00172593	-0.00292173	0.0121861
logitSUR_perfecthealth	_Idqol2a_3	-0.0149203	-0.0435951	0.107572	0.273672	-0.0086211	-0.00689924	0.0251098	0.0460141	-0.0104856	-0.0655451	0.019899	-0.0131817	-0.0130605	-0.028104	-0.00654641	-0.0185574	-0.0210666	-0.0334085	-0.010306	0.00154669	0.0105907	0.0492221	-0.00992916	-0.0225792	-0.00807524	-0.0415966	-0.0118843	-0.00650081	0.0269141	0.0199062	0.00252719	-0.0108287	-0.0804666	-0.231506	-0.000812244	-0.00922241	-0.00948314	-0.0295244	-0.0019499	-0.0341938	-0.0248576	-0.00218445	0.0109958	0.0344597	0.00228246	0.00737915	-0.00425564	0.0331337
logitSUR_perfecthealth	_Idqol3a_2	-0.0162556	-0.0138964	-0.00710984	-0.0086211	0.0815259	0.0809458	-0.00311014	-0.01917	-0.0171987	-0.00863867	-0.0173183	-0.0269078	0.00616581	0.00948626	0.00127106	-0.0150538	-0.00453778	0.00319581	-0.00429305	-0.00731322	-0.00567024	-0.00982815	-0.0183202	-0.013967	-0.0042578	-0.0155675	0.00766784	-0.00174574	-0.00852155	-0.0159986	-0.00853925	-0.0132973	0.0135522	0.0399094	-0.00414375	-0.00115256	0.00215902	0.00826402	0.00519028	0.000553112	0.00500248	0.00304875	-0.00601897	-0.000184757	-0.0140482	-0.0177762	-0.00125072	0.000105382
logitSUR_perfecthealth	_Idqol3a_3	-0.015271	-0.0472857	0.00302804	-0.00689924	0.0809458	0.209401	-0.025585	-0.083081	-0.0309447	-0.0527112	0.00163044	0.0122077	0.00304664	-0.0210205	-0.00378865	-0.0479138	-0.0145393	-0.0231582	-0.0205453	-0.0374763	-0.00632405	-0.00703998	-0.0164633	-0.0238901	-0.00831571	-0.0179882	0.00230418	0.00382768	-0.00801425	-0.0322986	-0.0104108	-0.0208468	0.0169791	0.0487083	0.0130706	0.0236466	-0.0154369	-0.0110683	0.00871993	-0.0076503	-0.00578966	0.0209304	-0.000132784	-0.00282747	-0.00938914	-0.033801	-0.00388871	0.00137526
logitSUR_perfecthealth	_Idqol4a_2	0.017818	-0.0128291	-0.0240755	0.0251098	-0.00311014	-0.025585	0.578713	0.810452	0.0440573	0.0369556	-0.010929	-0.0197116	-0.0207563	-0.0417706	-0.0566794	-0.00127941	0.00492212	0.0266122	-0.00512091	-0.0509673	0.00952227	0.0343036	-0.00557928	-0.00393392	-0.00160863	0.0180412	-0.00632603	-0.0249449	0.00111866	0.0558254	0.00409329	-0.0149475	0.0608727	0.048298	-0.0215981	-0.0620563	-0.00498267	0.0149574	0.00778223	0.0360067	0.0310981	0.0156405	-0.0163949	-0.0384364	0.0139741	0.0206247	-0.00370601	0.00382183
logitSUR_perfecthealth	_Idqol4a_3	0.0215625	-0.0175437	0.00867477	0.0460141	-0.01917	-0.083081	0.810452	1.8658	0.0663248	0.184344	-0.0282227	-0.0321559	-0.0410968	-0.048473	-0.105504	-0.0803649	-0.00497775	-0.00698289	-0.0342527	-0.0969724	-0.00333625	0.0331258	-0.00818348	-0.00259793	-0.00996358	0.0066052	0.012525	-0.0163428	-0.0184877	0.0763615	0.0249877	0.0137583	0.151315	0.182422	-0.0379028	-0.0868593	0.0222626	0.0358028	0.0090196	0.0582576	0.0454812	-0.0266159	-0.0313654	-0.0691206	0.0553434	0.092128	-0.00530302	0.0101175
logitSUR_perfecthealth	_Idqol5a_2	0.0133132	0.0277657	0.00139113	-0.0104856	-0.0171987	-0.0309447	0.0440573	0.0663248	0.344046	0.430684	-0.000485731	-0.00931404	-0.0176392	-0.0527907	-0.034792	-5.43364e-05	-0.00325213	-0.0313589	-0.0195477	-0.0281269	-0.00267741	-0.00900022	-0.0132268	-0.0221629	0.00714273	0.0228119	-0.0146577	0.0331331	0.0296349	0.0539541	0.00442717	0.0125979	-0.0264683	-0.0776093	-0.00463287	-0.020682	-0.00334722	0.00449372	-3.25564e-05	-0.0166974	-0.00315601	0.00539652	-0.00328506	-0.013285	0.00914175	0.00632841	0.00483668	-0.00123203
logitSUR_perfecthealth	_Idqol5a_3	0.044047	0.0982033	-0.0070416	-0.0655451	-0.00863867	-0.0527112	0.0369556	0.184344	0.430684	1.02877	-0.00236547	-0.043205	-0.0153951	-0.0844645	-0.0575133	-0.0239957	-0.0129141	-0.0821476	-0.028287	-0.0829933	-0.0121215	-0.0674629	-0.0277496	-0.0434978	0.0147158	0.0692342	-0.0283781	0.0160725	0.0421202	0.118916	0.0106805	0.0250015	0.0404779	0.0249541	-0.00775585	-0.0267812	-0.0046154	-0.00582246	-0.00848123	-0.0268471	-0.00926465	0.00508501	-0.00518945	-0.0179472	0.0228646	0.0108013	0.0166283	-0.00890071
logitSUR_perfecthealth	_Idqol6a_2	0.000597536	-0.0280329	0.00595162	0.019899	-0.0173183	0.00163044	-0.010929	-0.0282227	-0.000485731	-0.00236547	0.189852	0.270323	-0.0211951	-0.0698388	0.00239121	0.020349	-0.0142122	-0.0229134	0.00774598	0.00477022	0.00447478	0.0411268	0.00329025	0.0156097	-0.00706178	-0.00834472	-0.0109565	0.00601675	-0.0082539	-0.00974156	-0.000598761	0.00175708	-0.00778761	-0.0567466	0.00464677	-0.00310682	-0.02259	-0.0268784	-0.00916678	-5.25048e-05	0.00648258	0.0112131	0.000979137	0.00601312	-0.00297064	0.0113658	-0.00460837	0.00360908
logitSUR_perfecthealth	_Idqol6a_3	-0.00599274	-0.074523	0.00383338	-0.0131817	-0.0269078	0.0122077	-0.0197116	-0.0321559	-0.00931404	-0.043205	0.270323	0.636682	-0.0287157	-0.103989	0.00665271	0.00581419	-0.0119868	-0.0289611	0.0153157	0.0319704	0.0126369	0.0386074	0.0233404	0.0384793	-0.00250529	0.000836709	-0.0264881	-0.00927932	-0.0104085	-0.0122071	-0.00689497	-0.00264317	0.026136	-0.0195259	0.000580139	0.0142933	-0.0258348	-0.0377561	-0.0218603	0.00718265	0.0113138	0.0101999	0.00811108	0.0020349	-0.000221802	-0.0043579	-0.0105958	0.000350089
logitSUR_perfecthealth	_Idqol7a_2	0.00564754	-0.000620134	-0.0112447	-0.0130605	0.00616581	0.00304664	-0.0207563	-0.0410968	-0.0176392	-0.0153951	-0.0211951	-0.0287157	0.119708	0.158119	-0.00484348	-0.0052611	-0.00372348	-0.0218568	-0.00999982	-0.000117412	-0.0165945	-0.0306026	-0.00627621	-0.00243898	0.00333733	0.0186272	-0.00367725	-0.00571886	-0.015115	-0.0414471	-0.00173288	-0.00899358	6.3425e-05	0.0714412	-0.00683506	0.00192103	-0.00543019	0.0118296	-0.00695709	-0.0153898	0.00694557	-0.0122119	0.00226714	-0.00440164	-0.0130136	-0.0111745	-5.32402e-05	-0.00185615
logitSUR_perfecthealth	_Idqol7a_3	0.0148689	0.0021143	-0.0209095	-0.028104	0.00948626	-0.0210205	-0.0417706	-0.048473	-0.0527907	-0.0844645	-0.0698388	-0.103989	0.158119	0.437417	-0.00581143	-0.0771492	-0.00869859	-0.0351567	0.00759243	0.0277987	-0.023448	-0.0771826	-0.0102029	0.00596763	0.0222253	0.0265207	-0.0053637	-0.0229731	-0.0297276	-0.0821273	0.00253882	-0.0120713	0.0238901	0.220077	-0.0145998	-0.0215548	0.00877558	0.053638	-0.000850218	-0.00214373	0.00505158	-0.0931602	0.00377378	-0.0236036	-0.0215192	-0.0203005	0.000575308	-0.00255693
logitSUR_perfecthealth	_Idqol8a_2	-0.00899761	-0.0263342	0.00562566	-0.00654641	0.00127106	-0.00378865	-0.0566794	-0.105504	-0.034792	-0.0575133	0.00239121	0.00665271	-0.00484348	-0.00581143	0.162741	0.223612	-0.0159137	-0.00137267	-0.0169356	-0.0101933	0.00240221	0.0218736	0.0144179	0.00441106	-0.00638846	-0.00935269	-0.00380937	-0.00379197	-0.00397337	-0.0122008	-0.0135738	-0.0132095	-0.0204686	-0.0173966	0.00964612	0.0132965	-0.00414956	-0.0218405	0.00130426	0.0103907	-0.00393683	-0.0306506	-0.000962009	-0.00779197	-0.00404842	0.00102071	-0.00428613	0.00082047
logitSUR_perfecthealth	_Idqol8a_3	-0.00612521	-0.0539898	-0.000839343	-0.0185574	-0.0150538	-0.0479138	-0.00127941	-0.0803649	-5.43364e-05	-0.0239957	0.020349	0.00581419	-0.0052611	-0.0771492	0.223612	0.711332	-0.00330638	0.056971	-0.0219572	-0.0638481	0.0151273	0.0788629	0.0250566	0.0164317	-0.00558428	0.0119587	-0.00123082	-0.0202482	-0.0262591	-0.0893506	-0.025672	-0.0498857	-0.00609147	-0.061795	-0.007184	-0.0395109	-0.00332844	-0.00323958	0.0118057	0.0666917	0.0141025	-0.0125388	-0.00420032	-0.0332745	-0.0182372	0.010549	-0.00437084	-0.00290154
logitSUR_perfecthealth	_Idqol9a_2	-0.00781126	-0.00235775	-0.0164803	-0.0210666	-0.00453778	-0.0145393	0.00492212	-0.00497775	-0.00325213	-0.0129141	-0.0142122	-0.0119868	-0.00372348	-0.00869859	-0.0159137	-0.00330638	0.112116	0.139805	0.00699267	0.0124798	-0.0144457	-0.0182859	-0.00966576	-0.0152756	0.00215419	0.000443185	-0.00110303	-0.0109538	-0.0115373	-0.00414225	-0.00448345	-0.00759638	0.015719	-0.00865804	-0.0223308	-0.0305691	0.00649184	0.0176017	-0.013262	-0.0215074	0.000713896	0.0228653	-0.000423258	0.00515524	-0.00837661	-0.00474836	0.00107624	-0.00296713
logitSUR_perfecthealth	_Idqol9a_3	-0.0155109	-0.0188724	-0.0203231	-0.0334085	0.00319581	-0.0231582	0.0266122	-0.00698289	-0.0313589	-0.0821476	-0.0229134	-0.0289611	-0.0218568	-0.0351567	-0.00137267	0.056971	0.139805	0.307989	0.0215518	0.022187	-0.0143783	0.00735379	-0.00950241	-0.0251376	-0.0102538	-0.0282936	0.00169459	-0.0365039	-0.0131078	-0.00671039	-0.0121128	-0.0270352	0.0134967	-0.0310839	-0.0281761	-0.0663327	0.0231481	0.0329904	-0.0193842	-0.0296939	0.00340326	0.00946564	0.00724782	0.0297492	-0.00952209	-0.0278667	-0.000777751	-0.00612866
logitSUR_perfecthealth	_Idqol10a_2	-0.00412751	-0.00375522	-0.0052556	-0.010306	-0.00429305	-0.0205453	-0.00512091	-0.0342527	-0.0195477	-0.028287	0.00774598	0.0153157	-0.00999982	0.00759243	-0.0169356	-0.0219572	0.00699267	0.0215518	0.104773	0.11216	-0.0104032	0.000893657	-0.0120029	-0.00490585	-0.00236545	-0.00740822	-0.00720876	-0.0233786	-0.0276628	-0.026064	-0.00138961	-0.00775169	0.030709	0.0794409	-0.0141337	-0.0289323	0.00204101	0.0175075	-0.00532638	-0.00128957	0.00958624	-0.00627005	0.00783994	0.0233169	-0.00665129	-0.0120278	-0.000851171	-0.000519633
logitSUR_perfecthealth	_Idqol10a_3	-0.0256634	-0.0115005	0.00686566	0.00154669	-0.00731322	-0.0374763	-0.0509673	-0.0969724	-0.0281269	-0.0829933	0.00477022	0.0319704	-0.000117412	0.0277987	-0.0101933	-0.0638481	0.0124798	0.022187	0.11216	0.276587	-0.00787523	-0.0197774	-0.0082029	-0.017851	-0.00299309	-0.0335017	-0.010234	-0.0189526	-0.0306684	-0.0639836	-0.00576387	-0.00918692	0.0255642	0.0978135	-0.0219555	-0.0220232	0.0114082	0.0160484	-0.00616501	-0.0163698	0.00290694	-0.0302609	0.0186322	0.0511833	-0.0157745	-0.0202783	-0.00537205	0.00242585
logitSUR_perfecthealth	_Idqol11a_2	-0.00291354	0.000129777	0.00144879	0.0105907	-0.00567024	-0.00632405	0.00952227	-0.00333625	-0.00267741	-0.0121215	0.00447478	0.0126369	-0.0165945	-0.023448	0.00240221	0.0151273	-0.0144457	-0.0143783	-0.0104032	-0.00787523	0.0892892	0.0730851	0.00989877	0.00992514	-0.000262807	-0.00824231	-0.00834319	-0.0178294	0.0167509	0.0155187	-0.00709028	-0.00637145	-0.0179494	-0.0383779	0.00417882	0.00603095	-0.0121682	-0.0132842	-0.00501515	0.00731919	-0.00317766	-0.00342023	-0.00845897	-0.0166356	-0.00561143	-0.00684041	-0.000353646	0.00201942
logitSUR_perfecthealth	_Idqol11a_3	-0.00562016	-0.0281223	0.0122334	0.0492221	-0.00982815	-0.00703998	0.0343036	0.0331258	-0.00900022	-0.0674629	0.0411268	0.0386074	-0.0306026	-0.0771826	0.0218736	0.0788629	-0.0182859	0.00735379	0.000893657	-0.0197774	0.0730851	0.22647	-0.000856515	-0.00686806	0.00527827	-0.0142912	-0.0167296	-0.0375387	0.00140567	0.0247166	-0.00846539	-0.0321954	-0.00969509	-0.0262716	0.0134334	-0.00495354	-0.00844686	-0.0129872	0.00334539	0.00491511	0.000218228	-0.017093	-0.0091607	0.0021358	-0.00680648	-0.0188388	-0.00339261	0.00751038
logitSUR_perfecthealth	_Idqol12a_2	-0.00185693	0.00101315	-0.00331082	-0.00992916	-0.0183202	-0.0164633	-0.00557928	-0.00818348	-0.0132268	-0.0277496	0.00329025	0.0233404	-0.00627621	-0.0102029	0.0144179	0.0250566	-0.00966576	-0.00950241	-0.0120029	-0.0082029	0.00989877	-0.000856515	0.0854085	0.0849764	4.3449e-05	0.00349779	0.00159031	0.0103276	0.00387188	-0.00595037	-0.00872039	-0.0101875	-0.0124666	-0.0330093	-0.0127913	-0.00816469	-0.00301585	0.000240888	0.00381109	0.0144677	-0.0127805	-0.0132725	-0.0048517	-0.0159827	-0.00536358	-0.00289643	-0.000202516	-0.00158728
logitSUR_perfecthealth	_Idqol12a_3	0.000109626	0.00130988	-0.00633262	-0.0225792	-0.013967	-0.0238901	-0.00393392	-0.00259793	-0.0221629	-0.0434978	0.0156097	0.0384793	-0.00243898	0.00596763	0.00441106	0.0164317	-0.0152756	-0.0251376	-0.00490585	-0.017851	0.00992514	-0.00686806	0.0849764	0.180029	-0.00101146	0.000339993	0.0118436	0.00945672	-0.0157542	-0.0412492	0.000626376	-0.00589301	-0.0173374	-0.0394299	-0.0250631	-0.0229752	-0.0046191	0.00229969	-0.00282901	0.0135223	-0.0034297	-0.00744308	-0.00706722	-0.0311842	-0.0185076	-0.00440629	-0.000958767	-0.00375808
logitSUR_perfecthealth	_Idqol13a_2	-0.00198082	0.00506951	-0.0108905	-0.00807524	-0.0042578	-0.00831571	-0.00160863	-0.00996358	0.00714273	0.0147158	-0.00706178	-0.00250529	0.00333733	0.0222253	-0.00638846	-0.00558428	0.00215419	-0.0102538	-0.00236545	-0.00299309	-0.000262807	0.00527827	4.3449e-05	-0.00101146	0.0968469	0.125651	-0.0233234	-0.044951	0.0144174	0.0289568	-0.0051908	-0.00336446	0.00140042	0.0200393	-0.00476601	-0.00427977	-0.00729205	-0.00536325	-0.00408464	-0.00780286	-0.015889	-0.0144884	-0.00321361	-0.010077	-0.00896271	-0.00561035	0.00214496	-0.00123577
logitSUR_perfecthealth	_Idqol13a_3	0.0100391	0.0232363	-0.0288713	-0.0415966	-0.0155675	-0.0179882	0.0180412	0.0066052	0.0228119	0.0692342	-0.00834472	0.000836709	0.0186272	0.0265207	-0.00935269	0.0119587	0.000443185	-0.0282936	-0.00740822	-0.0335017	-0.00824231	-0.0142912	0.00349779	0.000339993	0.125651	0.322085	-0.0345792	-0.0787911	0.00393674	0.0244623	0.00576537	-0.00657346	0.00148637	0.0285558	-0.00649287	-0.0136249	-0.00473629	0.00820531	-0.0153225	-0.0248642	-0.00312791	0.014339	-0.00713309	-0.0328091	-0.00531425	0.00638741	0.00638743	-0.00789372
logitSUR_perfecthealth	_Idqol14a_2	-0.00299182	0.00398859	0.00357425	-0.0118843	0.00766784	0.00230418	-0.00632603	0.012525	-0.0146577	-0.0283781	-0.0109565	-0.0264881	-0.00367725	-0.0053637	-0.00380937	-0.00123082	-0.00110303	0.00169459	-0.00720876	-0.010234	-0.00834319	-0.0167296	0.00159031	0.0118436	-0.0233234	-0.0345792	0.10055	0.118524	-0.0152057	-0.038375	-0.0112251	-0.0104846	-0.00429753	0.00089243	-0.000737273	-0.00597187	-0.0114215	-0.0121666	0.000945194	0.00131694	0.0104245	-0.00153042	-0.00910783	-0.0067243	-0.00974549	0.00770244	-0.000334064	-0.00160895
logitSUR_perfecthealth	_Idqol14a_3	-0.00589579	-0.000731943	0.00612952	-0.00650081	-0.00174574	0.00382768	-0.0249449	-0.0163428	0.0331331	0.0160725	0.00601675	-0.00927932	-0.00571886	-0.0229731	-0.00379197	-0.0202482	-0.0109538	-0.0365039	-0.0233786	-0.0189526	-0.0178294	-0.0375387	0.0103276	0.00945672	-0.044951	-0.0787911	0.118524	0.327271	-0.0208276	-0.0397908	-0.0100985	-0.0171883	-0.0148892	-0.0164268	-0.00186006	0.000518217	-0.0247125	-0.0426942	-0.00215677	-0.0432945	-0.00320345	-0.00772671	-0.0164517	-0.0274984	0.0183198	0.0291628	-0.00169825	0.000151571
logitSUR_perfecthealth	_Idqol15a_2	-0.000608414	-0.00635053	0.00792728	0.0269141	-0.00852155	-0.00801425	0.00111866	-0.0184877	0.0296349	0.0421202	-0.0082539	-0.0104085	-0.015115	-0.0297276	-0.00397337	-0.0262591	-0.0115373	-0.0131078	-0.0276628	-0.0306684	0.0167509	0.00140567	0.00387188	-0.0157542	0.0144174	0.00393674	-0.0152057	-0.0208276	0.181202	0.187486	-0.00623632	0.00714259	-0.0825955	-0.14823	0.0113515	0.042005	-0.00766125	-0.0433164	-0.0153348	-0.0304474	-0.0280177	-0.0416191	-0.00259536	-0.00162178	0.0103948	0.0187256	-0.000148052	0.0023952
logitSUR_perfecthealth	_Idqol15a_3	-0.00285036	0.00479811	-0.00908443	0.0199062	-0.0159986	-0.0322986	0.0558254	0.0763615	0.0539541	0.118916	-0.00974156	-0.0122071	-0.0414471	-0.0821273	-0.0122008	-0.0893506	-0.00414225	-0.00671039	-0.026064	-0.0639836	0.0155187	0.0247166	-0.00595037	-0.0412492	0.0289568	0.0244623	-0.038375	-0.0397908	0.187486	0.515708	0.00296292	0.0186775	-0.0618835	-0.145864	0.0263689	0.0455669	-0.0188235	-0.0949884	-0.0134138	-0.0634842	-0.0454068	-0.0574997	-0.0160665	0.00208612	0.0402392	0.0278905	0.00105984	0.0012461
logitSUR_perfecthealth	_Idqol16a_2	0.0124149	0.0108965	-0.0063311	0.00252719	-0.00853925	-0.0104108	0.00409329	0.0249877	0.00442717	0.0106805	-0.000598761	-0.00689497	-0.00173288	0.00253882	-0.0135738	-0.025672	-0.00448345	-0.0121128	-0.00138961	-0.00576387	-0.00709028	-0.00846539	-0.00872039	0.000626376	-0.0051908	0.00576537	-0.0112251	-0.0100985	-0.00623632	0.00296292	0.0786988	0.0648773	-0.00408901	-0.0244045	-0.00576103	-0.00405031	0.00774357	0.00884428	-0.0092329	-0.00885638	0.000982974	0.00748242	-0.00267999	-0.00746548	-0.00185222	-0.00596364	0.00138097	-0.000234132
logitSUR_perfecthealth	_Idqol16a_3	0.0142898	0.0254427	-0.00769462	-0.0108287	-0.0132973	-0.0208468	-0.0149475	0.0137583	0.0125979	0.0250015	0.00175708	-0.00264317	-0.00899358	-0.0120713	-0.0132095	-0.0498857	-0.00759638	-0.0270352	-0.00775169	-0.00918692	-0.00637145	-0.0321954	-0.0101875	-0.00589301	-0.00336446	-0.00657346	-0.0104846	-0.0171883	0.00714259	0.0186775	0.0648773	0.159459	-0.0112843	-0.0334231	0.00891331	0.0141591	0.000152179	-0.0177903	-0.0105888	-0.0121828	-0.0148751	-0.00284171	-0.00772029	-0.0249743	0.00643202	0.0130347	0.00256584	-0.00182982
logitSUR_perfecthealth	_Idqol17a_2	0.00357122	-0.017132	-0.0305239	-0.0804666	0.0135522	0.0169791	0.0608727	0.151315	-0.0264683	0.0404779	-0.00778761	0.026136	6.3425e-05	0.0238901	-0.0204686	-0.00609147	0.015719	0.0134967	0.030709	0.0255642	-0.0179494	-0.00969509	-0.0124666	-0.0173374	0.00140042	0.00148637	-0.00429753	-0.0148892	-0.0825955	-0.0618835	-0.00408901	-0.0112843	0.512834	0.97201	-0.0112652	-0.0472086	0.0229894	0.0706733	0.0255641	0.107414	-0.0134927	-0.0291901	-0.00839498	-0.0369937	-0.025153	-0.0593974	-0.000837531	-0.0115849
logitSUR_perfecthealth	_Idqol17a_3	-0.00472882	-0.0431931	-0.0723943	-0.231506	0.0399094	0.0487083	0.048298	0.182422	-0.0776093	0.0249541	-0.0567466	-0.0195259	0.0714412	0.220077	-0.0173966	-0.061795	-0.00865804	-0.0310839	0.0794409	0.0978135	-0.0383779	-0.0262716	-0.0330093	-0.0394299	0.0200393	0.0285558	0.00089243	-0.0164268	-0.14823	-0.145864	-0.0244045	-0.0334231	0.97201	2.79264	0.00350528	-0.0431148	0.0538343	0.163494	0.0707342	0.244707	-0.0320526	-0.139629	-0.0148266	-0.0595399	-0.0469639	-0.100746	-0.00674514	-0.0327286
logitSUR_perfecthealth	_Idqol18a_2	-0.00255407	-0.000973431	-0.00342267	-0.000812244	-0.00414375	0.0130706	-0.0215981	-0.0379028	-0.00463287	-0.00775585	0.00464677	0.000580139	-0.00683506	-0.0145998	0.00964612	-0.007184	-0.0223308	-0.0281761	-0.0141337	-0.0219555	0.00417882	0.0134334	-0.0127913	-0.0250631	-0.00476601	-0.00649287	-0.000737273	-0.00186006	0.0113515	0.0263689	-0.00576103	0.00891331	-0.0112652	0.00350528	0.110101	0.127428	-0.020653	-0.0334901	-0.00622454	-0.00597634	-0.00751756	-0.0132316	-0.00972167	-0.0146797	0.000867667	-0.00207869	-0.000451553	0.001146
logitSUR_perfecthealth	_Idqol18a_3	0.00209661	0.0135961	-0.00214313	-0.00922241	-0.00115256	0.0236466	-0.0620563	-0.0868593	-0.020682	-0.0267812	-0.00310682	0.0142933	0.00192103	-0.0215548	0.0132965	-0.0395109	-0.0305691	-0.0663327	-0.0289323	-0.0220232	0.00603095	-0.00495354	-0.00816469	-0.0229752	-0.00427977	-0.0136249	-0.00597187	0.000518217	0.042005	0.0455669	-0.00405031	0.0141591	-0.0472086	-0.0431148	0.127428	0.289713	-0.0210886	-0.0687685	-0.00796576	-0.0174318	-0.0325413	-0.0202215	-0.0154697	-0.0380682	-0.0016961	-0.0131537	0.0013226	0.00207311
logitSUR_perfecthealth	_Idqol19a_2	-0.00918411	-0.00413984	-0.00213824	-0.00948314	0.00215902	-0.0154369	-0.00498267	0.0222626	-0.00334722	-0.0046154	-0.02259	-0.0258348	-0.00543019	0.00877558	-0.00414956	-0.00332844	0.00649184	0.0231481	0.00204101	0.0114082	-0.0121682	-0.00844686	-0.00301585	-0.0046191	-0.00729205	-0.00473629	-0.0114215	-0.0247125	-0.00766125	-0.0188235	0.00774357	0.000152179	0.0229894	0.0538343	-0.020653	-0.0210886	0.0892234	0.100869	-0.00342248	0.00363446	0.00107302	-0.0120274	0.000874834	0.00585571	-0.00504718	-0.0195795	5.90097e-05	-0.00207508
logitSUR_perfecthealth	_Idqol19a_3	-0.00395396	-0.0136991	-0.01097	-0.0295244	0.00826402	-0.0110683	0.0149574	0.0358028	0.00449372	-0.00582246	-0.0268784	-0.0377561	0.0118296	0.053638	-0.0218405	-0.00323958	0.0176017	0.0329904	0.0175075	0.0160484	-0.0132842	-0.0129872	0.000240888	0.00229969	-0.00536325	0.00820531	-0.0121666	-0.0426942	-0.0433164	-0.0949884	0.00884428	-0.0177903	0.0706733	0.163494	-0.0334901	-0.0687685	0.100869	0.250043	0.000630392	0.0203315	0.00761483	-0.0503209	0.00562646	0.0118125	-0.0312449	-0.0554672	-0.000839819	-0.00659013
logitSUR_perfecthealth	_Idqol20a_2	-0.0147248	-0.0153792	0.00366435	-0.0019499	0.00519028	0.00871993	0.00778223	0.0090196	-3.25564e-05	-0.00848123	-0.00916678	-0.0218603	-0.00695709	-0.000850218	0.00130426	0.0118057	-0.013262	-0.0193842	-0.00532638	-0.00616501	-0.00501515	0.00334539	0.00381109	-0.00282901	-0.00408464	-0.0153225	0.000945194	-0.00215677	-0.0153348	-0.0134138	-0.0092329	-0.0105888	0.0255641	0.0707342	-0.00622454	-0.00796576	-0.00342248	0.000630392	0.103118	0.135633	-0.00736828	0.0132804	-0.00648338	-0.0100641	0.00135893	-0.0130555	-0.00221316	-2.02289e-05
logitSUR_perfecthealth	_Idqol20a_3	-0.0115291	-0.0307041	-0.00528352	-0.0341938	0.000553112	-0.0076503	0.0360067	0.0582576	-0.0166974	-0.0268471	-5.25048e-05	0.00718265	-0.0153898	-0.00214373	0.0103907	0.0666917	-0.0215074	-0.0296939	-0.00128957	-0.0163698	0.00731919	0.00491511	0.0144677	0.0135223	-0.00780286	-0.0248642	0.00131694	-0.0432945	-0.0304474	-0.0634842	-0.00885638	-0.0121828	0.107414	0.244707	-0.00597634	-0.0174318	0.00363446	0.0203315	0.135633	0.384965	-0.00204942	0.0100095	-0.0172694	-0.0601825	0.000396639	-0.0153758	-0.0039518	-0.00412401
logitSUR_perfecthealth	_Idqol21a_2	-0.0101251	-0.0138813	-0.0129688	-0.0248576	0.00500248	-0.00578966	0.0310981	0.0454812	-0.00315601	-0.00926465	0.00648258	0.0113138	0.00694557	0.00505158	-0.00393683	0.0141025	0.000713896	0.00340326	0.00958624	0.00290694	-0.00317766	0.000218228	-0.0127805	-0.0034297	-0.015889	-0.00312791	0.0104245	-0.00320345	-0.0280177	-0.0454068	0.000982974	-0.0148751	-0.0134927	-0.0320526	-0.00751756	-0.0325413	0.00107302	0.00761483	-0.00736828	-0.00204942	0.154255	0.120503	-0.00155868	0.0111806	0.00164449	0.0227136	-0.00192579	-0.00289581
logitSUR_perfecthealth	_Idqol21a_3	0.00805948	0.0295445	-0.00993574	-0.00218445	0.00304875	0.0209304	0.0156405	-0.0266159	0.00539652	0.00508501	0.0112131	0.0101999	-0.0122119	-0.0931602	-0.0306506	-0.0125388	0.0228653	0.00946564	-0.00627005	-0.0302609	-0.00342023	-0.017093	-0.0132725	-0.00744308	-0.0144884	0.014339	-0.00153042	-0.00772671	-0.0416191	-0.0574997	0.00748242	-0.00284171	-0.0291901	-0.139629	-0.0132316	-0.0202215	-0.0120274	-0.0503209	0.0132804	0.0100095	0.120503	0.418554	0.00271826	0.00230293	-0.00384829	-0.0259109	0.00524629	-0.000739923
logitSUR_perfecthealth	_Idqol22a_2	-0.00593602	-0.0136371	0.01057	0.0109958	-0.00601897	-0.000132784	-0.0163949	-0.0313654	-0.00328506	-0.00518945	0.000979137	0.00811108	0.00226714	0.00377378	-0.000962009	-0.00420032	-0.000423258	0.00724782	0.00783994	0.0186322	-0.00845897	-0.0091607	-0.0048517	-0.00706722	-0.00321361	-0.00713309	-0.00910783	-0.0164517	-0.00259536	-0.0160665	-0.00267999	-0.00772029	-0.00839498	-0.0148266	-0.00972167	-0.0154697	0.000874834	0.00562646	-0.00648338	-0.0172694	-0.00155868	0.00271826	0.0595218	0.0682142	-0.00457171	-0.00848019	-0.00186181	0.00107716
logitSUR_perfecthealth	_Idqol22a_3	-0.011238	-0.0231191	0.0157133	0.0344597	-0.000184757	-0.00282747	-0.0384364	-0.0691206	-0.013285	-0.0179472	0.00601312	0.0020349	-0.00440164	-0.0236036	-0.00779197	-0.0332745	0.00515524	0.0297492	0.0233169	0.0511833	-0.0166356	0.0021358	-0.0159827	-0.0311842	-0.010077	-0.0328091	-0.0067243	-0.0274984	-0.00162178	0.00208612	-0.00746548	-0.0249743	-0.0369937	-0.0595399	-0.0146797	-0.0380682	0.00585571	0.0118125	-0.0100641	-0.0601825	0.0111806	0.00230293	0.0682142	0.208627	-0.00524835	-0.0220776	-0.00462879	0.00410677
logitSUR_perfecthealth	_Idqol23a_2	-0.0113713	-0.00959829	-0.00272104	0.00228246	-0.0140482	-0.00938914	0.0139741	0.0553434	0.00914175	0.0228646	-0.00297064	-0.000221802	-0.0130136	-0.0215192	-0.00404842	-0.0182372	-0.00837661	-0.00952209	-0.00665129	-0.0157745	-0.00561143	-0.00680648	-0.00536358	-0.0185076	-0.00896271	-0.00531425	-0.00974549	0.0183198	0.0103948	0.0402392	-0.00185222	0.00643202	-0.025153	-0.0469639	0.000867667	-0.0016961	-0.00504718	-0.0312449	0.00135893	0.000396639	0.00164449	-0.00384829	-0.00457171	-0.00524835	0.0978358	0.10013	-0.00151924	0.00128733
logitSUR_perfecthealth	_Idqol23a_3	-0.0104277	0.000684578	-0.00172593	0.00737915	-0.0177762	-0.033801	0.0206247	0.092128	0.00632841	0.0108013	0.0113658	-0.0043579	-0.0111745	-0.0203005	0.00102071	0.010549	-0.00474836	-0.0278667	-0.0120278	-0.0202783	-0.00684041	-0.0188388	-0.00289643	-0.00440629	-0.00561035	0.00638741	0.00770244	0.0291628	0.0187256	0.0278905	-0.00596364	0.0130347	-0.0593974	-0.100746	-0.00207869	-0.0131537	-0.0195795	-0.0554672	-0.0130555	-0.0153758	0.0227136	-0.0259109	-0.00848019	-0.0220776	0.10013	0.24495	-0.00036853	0.00326981
logitSUR_perfecthealth	dqolwi1	0.0152613	0.0323484	-0.00292173	-0.00425564	-0.00125072	-0.00388871	-0.00370601	-0.00530302	0.00483668	0.0166283	-0.00460837	-0.0105958	-5.32402e-05	0.000575308	-0.00428613	-0.00437084	0.00107624	-0.000777751	-0.000851171	-0.00537205	-0.000353646	-0.00339261	-0.000202516	-0.000958767	0.00214496	0.00638743	-0.000334064	-0.00169825	-0.000148052	0.00105984	0.00138097	0.00256584	-0.000837531	-0.00674514	-0.000451553	0.0013226	5.90097e-05	-0.000839819	-0.00221316	-0.0039518	-0.00192579	0.00524629	-0.00186181	-0.00462879	-0.00151924	-0.00036853	0.00665426	-0.00125427
logitSUR_perfecthealth	dqolwi2	-0.00305311	-0.00814613	0.0121861	0.0331337	0.000105382	0.00137526	0.00382183	0.0101175	-0.00123203	-0.00890071	0.00360908	0.000350089	-0.00185615	-0.00255693	0.00082047	-0.00290154	-0.00296713	-0.00612866	-0.000519633	0.00242585	0.00201942	0.00751038	-0.00158728	-0.00375808	-0.00123577	-0.00789372	-0.00160895	0.000151571	0.0023952	0.0012461	-0.000234132	-0.00182982	-0.0115849	-0.0327286	0.001146	0.00207311	-0.00207508	-0.00659013	-2.02289e-05	-0.00412401	-0.00289581	-0.000739923	0.00107716	0.00410677	0.00128733	0.00326981	-0.00125427	0.00566356
logitSUR_perfecthealth	dqolwi3	-0.00150397	-0.0043497	0.00210633	-0.000844775	0.00837824	0.0230009	-0.00960496	-0.0175645	-0.00787135	-0.0113744	-0.00144893	0.00192197	0.0018535	0.000734452	-0.000542387	-0.0101318	-0.00213563	-0.00402012	-0.00229995	-0.00143436	-0.00176515	-0.00471642	-0.000730589	0.000162606	-0.00248551	-0.00503736	0.00153573	0.00201117	-0.0018732	-0.0089046	-0.00112698	-0.0026596	0.00207609	0.00630829	0.000656107	0.00322623	-0.000896839	-4.87626e-05	0.000981228	-0.00147445	-0.00154643	0.00165757	0.00155588	0.000443294	-0.00192787	-0.005168	-0.00076019	-0.000187037
logitSUR_perfecthealth	dqolwi4	0.000697806	-0.00774972	0.00198644	0.0132186	-0.00342601	-0.0132185	0.129079	0.294557	0.00931236	0.0217197	-0.00339483	-0.00806358	-0.00726294	-0.00814523	-0.0152047	-0.00933093	-0.00127723	-0.0016912	-0.00754813	-0.0177471	0.00159921	0.00873205	-0.00289099	-0.00508004	-0.000139753	0.0023825	0.00298559	-0.00250947	0.000780587	0.0162796	0.00372607	0.00176058	0.0233744	0.0286072	-0.00497112	-0.0155182	0.00324788	0.00750618	-0.000877148	0.00444555	0.00798505	-0.00667366	-0.00457699	-0.0094707	0.00744734	0.0148843	-0.00162427	0.00254521
logitSUR_perfecthealth	dqolwi5	0.00608582	0.0107508	-0.000250722	-0.00634027	-0.00376565	-0.0102806	0.00940175	0.0358822	0.0735996	0.158327	0.00194775	-0.000437937	-0.00427863	-0.015105	-0.00651072	0.00343901	-0.00279313	-0.012466	-0.00675929	-0.0132802	-0.00040068	-0.00769233	-0.00241526	-0.00537981	0.00448422	0.0153988	-0.00495278	0.00533133	0.0119784	0.0256993	0.00237387	0.00341211	-0.00129203	-0.0171979	-0.00251893	-0.00619007	-0.00111598	-7.75272e-05	-0.00415823	-0.00984173	-0.00250758	-0.00207652	0.00036765	-0.00192668	0.00579208	0.00474256	0.00200143	-0.0011936
logitSUR_perfecthealth	dqolwi6	0.000733212	-0.00715366	0.000560831	-0.000573388	-0.0046359	0.00138012	0.00125961	0.00594514	0.0018139	0.00146375	0.0414999	0.087821	-0.00425039	-0.0158533	-0.000569505	-0.000821111	-0.00358056	-0.00776778	0.00153932	0.00318869	0.000924721	0.00617066	0.00363562	0.00543809	-0.00212877	-0.00204535	-0.00381812	0.00120283	-0.00237366	-0.000693188	-0.00016698	0.000840504	0.0074958	0.00698052	0.00144868	0.00255432	-0.00373528	-0.00524363	-0.00204835	0.00176268	0.00325893	0.00375449	0.000190057	-0.0013144	0.000557671	0.00183061	-0.000877037	0.000173008
logitSUR_perfecthealth	dqolwi7	5.46465e-05	-0.00309546	-0.00168006	-0.0044573	0.00174263	-0.000536726	-0.00527856	-0.012545	-0.0065995	-0.0102904	-0.00843628	-0.0118103	0.0218325	0.0554547	-0.000538125	-0.00568958	-0.00121299	-0.00364154	0.000919227	0.00392283	-0.0040114	-0.00976623	-0.00159035	0.000239853	0.00337115	0.00319307	-0.00175561	-0.00368755	-0.00639907	-0.0159482	-0.000418793	-0.00196164	0.00830803	0.0433339	-0.00154988	-0.00163009	0.00162397	0.00855177	0.00184399	0.00377176	0.000691914	-0.00856189	0.00090962	-0.00324813	-0.00344365	-0.00668653	-0.000504726	-0.000508826
logitSUR_perfecthealth	dqolwi8	-0.000930512	-0.00864029	-0.000529418	-0.00455182	-0.00176728	-0.00613239	-0.00572133	-0.0272769	-0.00125752	-0.00462644	-0.00187494	-0.00605072	0.000506527	-0.0073799	0.0334184	0.0991338	-0.000829712	0.00812779	-0.00264357	-0.00623821	0.000785204	0.00644491	0.00397968	0.00226669	-0.00054322	0.0024724	0.00165839	0.000461202	-0.0014778	-0.0132242	-0.0039134	-0.00810186	0.00192944	0.00661388	-0.0014008	-0.0049994	-0.000787867	0.00100621	0.00198424	0.00895312	-0.000132766	-0.00373872	-5.42826e-05	-0.00337534	-0.0031977	-0.00114302	-0.00104294	-0.000944961
logitSUR_perfecthealth	dqolwi9	-0.00118358	-0.000601043	-0.00458891	-0.00698858	0.000585708	-0.000976688	0.00293945	-0.00371543	-0.00741839	-0.0140024	-0.00204993	-0.00121994	-0.00197164	-0.0028621	-0.00327762	0.0028031	0.0215888	0.0441585	0.00428926	0.00338736	-0.00188551	0.00112602	-0.00280364	-0.00374083	-0.0021395	-0.00348547	8.67318e-05	-0.00621585	-0.00254901	0.000617388	-0.00175217	-0.00419732	0.00070256	-0.00512828	-0.0043498	-0.0116477	0.00271709	0.0032353	-0.00295217	-0.00424582	0.00432555	0.00904068	0.000596297	0.00595092	-0.00061905	-0.00280791	4.46101e-05	-0.00133201
logitSUR_perfecthealth	dqolwi10	-0.00304823	-7.12102e-05	0.00127512	0.00126555	8.49578e-05	-0.00337051	-0.00936571	-0.0144068	-0.00479676	-0.0125423	0.00042162	0.0029298	0.000121287	0.0047939	0.000819396	-0.00769074	0.00275107	0.00409136	0.0144413	0.0336442	-0.000645301	-1.4265e-05	-0.00153579	-0.00262416	5.15535e-06	-0.00407555	-0.000866757	-0.00369878	-0.00560066	-0.00873884	-0.00136439	-0.00236902	0.00330331	0.0159884	-0.00349762	-0.00594006	0.00154638	0.00187889	-0.00165009	-0.00361075	0.000844557	-0.00296144	0.00168694	0.00665716	-0.00172828	-0.000868759	-0.000582051	0.000506066
logitSUR_perfecthealth	dqolwi11	-0.000159597	-0.00266304	0.00295636	0.0105533	-0.00319866	-0.000803606	0.0017516	-0.00278277	0.00307408	-0.0056726	0.00798984	0.00641388	-0.00531158	-0.0148306	0.00113664	0.00424982	-0.003779	-0.00456068	-0.00289206	-0.00590694	0.0140529	0.0324195	-0.000127895	-0.000710949	8.27037e-05	-0.00264346	-0.00228573	-0.00127521	0.00509454	0.0108271	0.000168932	0.00019309	-0.0161173	-0.0394252	0.0025699	0.00183325	-0.00421844	-0.00902976	-0.00324121	-0.00905375	0.000375629	-0.00340504	-0.00149281	-0.000156705	9.92002e-05	-0.000625635	-0.000407633	0.00149616
logitSUR_perfecthealth	dqolwi12	0.000771549	0.00149093	-0.000951186	-0.00477881	-0.00152511	-0.00261938	0.00262016	0.00669224	0.00101487	-0.000572549	0.00291595	0.00537905	-0.00143373	-0.00267252	0.000716558	0.00369043	-0.00215979	-0.00293889	-0.0019098	-0.00573875	0.00197911	-0.000928312	0.00919594	0.0205125	-0.00129081	-0.000442169	0.00185425	0.00351559	-0.00168261	-0.00440648	0.00142633	0.00116225	-0.00329233	-0.00998126	-0.00162687	-0.000714061	-0.00130874	-5.61869e-05	-0.000549734	0.00300972	-0.000407245	-0.000502889	-0.000600584	-0.00445083	-0.00198281	-0.000455515	-2.1096e-06	-0.000644249
logitSUR_perfecthealth	dqolwi13	0.00222848	0.00587644	-0.00361244	-0.00640325	-0.00211889	-0.00394405	-1.50116e-05	-0.0015459	0.00340053	0.0106243	-0.00421435	-0.00226716	0.00140927	0.00516417	0.000870531	0.00371231	-0.00166926	-0.00616047	-0.00132756	-0.00293923	-0.00136556	-0.00245982	-0.000282026	-0.00242421	0.0167822	0.0419395	-0.00454026	-0.011289	0.00371781	0.00623823	0.00117748	0.000774978	0.000304811	0.00194311	0.000506479	0.00131496	-0.000280253	-0.000530635	-0.000829463	-0.00088979	-0.00252395	-0.00234905	-0.0012894	-0.00484163	-0.000304084	0.000882993	0.00101619	-0.00105657
logitSUR_perfecthealth	dqolwi14	-0.00064845	-0.000138172	0.00119694	0.000312225	-0.000848036	-0.000175196	-0.00249073	0.00286211	0.00143668	-0.000159094	0.0023024	-0.00165606	-0.00117264	-0.00284909	-0.00105862	-0.00456406	-0.000183267	-0.00201249	-0.00143758	0.000647737	-0.00246672	-0.00602862	0.00142996	0.00209252	-0.00510727	-0.00960008	0.0157259	0.0413818	-0.00250801	-0.00795409	-0.0016838	-0.00210172	-0.00184531	0.00182066	-0.0032339	-0.00537939	-0.00206977	-0.0029576	-0.0032229	-0.00871261	0.000500147	-0.00217948	-0.000831369	-0.000334296	0.00339296	0.00723045	-0.000104616	-4.64061e-05
logitSUR_perfecthealth	dqolwi15	-0.000640773	0.00116206	-0.00106762	0.0033991	-0.00159453	-0.00290003	0.0085641	0.0145784	0.0108911	0.0207089	-0.00397652	-0.0023468	-0.00758754	-0.0128996	-0.00440062	-0.0188221	-0.000593103	-0.00278902	-0.00557847	-0.0104067	0.00229841	-0.000512891	-0.0013739	-0.00819761	0.00376579	0.00159309	-0.00410138	-3.09525e-06	0.0345636	0.0811543	-0.000597832	0.00280404	-0.0139649	-0.0341227	0.00577909	0.0107506	-0.00390935	-0.0172621	-0.00361034	-0.0121651	-0.00749284	-0.0104377	-0.00440563	-0.00322131	0.00705914	0.00691221	0.0003334	0.000292211
logitSUR_perfecthealth	dqolwi16	0.00104966	0.00385667	-0.000351388	-0.00115585	-0.00165585	-0.00290832	-0.00191386	0.0015671	0.000869917	0.00318824	0.000975836	-0.000129053	-0.000970318	-0.000461684	-0.00214995	-0.00863328	-0.00115911	-0.0038199	-0.0017598	-0.0020956	-0.000826424	-0.00537983	8.66867e-05	0.00133738	4.41169e-05	-0.000350632	-0.00215276	-0.00353993	0.00164703	0.00412872	0.00623147	0.018493	-0.00218682	-0.00731243	0.000549348	0.00195587	0.000177382	-0.00274388	-0.000675096	-0.00121051	-0.00450043	-0.00197017	-0.000437256	-0.00418977	0.00189722	0.00259226	0.000465971	-0.000253017
logitSUR_perfecthealth	dqolwi17	0.00135634	-0.00367129	-0.0113812	-0.0331579	0.00666637	0.00705958	0.0229327	0.0665653	-0.00698218	0.0161356	-0.00185712	0.0132028	0.00729735	0.0212671	-0.0058329	-0.00902149	-0.000593131	-0.00491833	0.0132115	0.0113549	-0.00824372	-0.0019953	-0.0061215	-0.00577186	0.00244537	0.00962826	-0.000462266	-0.00527211	-0.029495	-0.023525	-0.0043806	-0.00715007	0.157354	0.403777	3.39233e-05	-0.012131	0.00789241	0.022714	0.00784085	0.0318563	0.00184536	-0.00949299	-0.00404177	-0.0105701	-0.00545986	-0.012779	-0.000191531	-0.00460276
logitSUR_perfecthealth	dqolwi18	0.00131753	0.00260949	-0.00083207	-0.00126325	0.000433956	0.00314314	-0.00806369	-0.0143057	-0.00212451	-0.00588134	0.00104554	0.00309307	0.00220932	0.000114284	1.37524e-05	-0.00700552	-0.00441506	-0.00874293	-0.00192944	0.000289789	-0.000380315	0.000689658	-0.000841042	-0.00217953	-0.000590893	-0.0029941	-0.00154538	-0.000792615	0.00435747	0.00455301	0.000511293	0.000464154	-0.00532465	-0.00361176	0.0134551	0.0307076	-0.000611448	-0.00106702	-0.000625821	-0.0039517	-0.00453229	-0.00701132	-0.000609073	-0.00162906	-0.00217548	-0.00470201	-1.32639e-05	1.72358e-05
logitSUR_perfecthealth	dqolwi19	-0.000644901	-0.00309445	-0.00180994	-0.00216381	0.000820806	-0.00303068	0.00149341	0.00221937	-0.00145937	-0.00372109	-0.00525948	-0.00798393	0.00270284	0.00772662	-0.00366116	0.000125587	0.00376202	0.00809453	0.00208917	0.000666982	-0.00171622	0.000408074	-0.000620963	0.000166157	-4.31907e-06	0.00327811	-0.000224931	-0.0067677	-0.00456311	-0.0135979	0.000555313	-0.00299622	0.00728039	0.0194327	-0.00327202	-0.00653927	0.0120286	0.0313531	0.000718303	0.00298691	0.00284415	-0.00558168	2.23087e-05	0.00201491	-0.00485866	-0.00762491	0.000194123	-0.000600082
logitSUR_perfecthealth	dqolwi20	-0.00195783	-0.00305437	0.000448633	-0.00143554	-0.00015647	-0.00168375	0.00396862	0.0047971	-0.00460327	-0.00515329	0.000982098	0.0016558	-0.00269919	-0.00377974	0.00366944	0.0103302	-0.00406617	-0.00373604	0.000849004	-0.000335633	0.00130557	0.00311763	0.000999967	-0.000490198	-0.00108084	-0.00345269	-0.00211168	-0.00868578	-0.00362653	-0.0020386	-0.00129749	-0.00160085	0.0163787	0.037533	-2.53075e-05	-0.00137	-8.08193e-05	-0.00203899	0.0189847	0.0510579	-0.000156479	0.00453739	-0.00186606	-0.00394937	0.000197201	-0.00202924	-0.000784621	1.56533e-06
logitSUR_perfecthealth	dqolwi21	0.00024804	0.00151867	-0.00306632	-0.00344023	-0.000155455	0.000610728	0.008224	0.00920196	-0.00328224	-0.0054177	0.00209667	0.00361772	-0.00104936	-0.0118951	-0.0026251	0.0033038	0.00256389	0.00317584	-0.00126709	-0.00436931	0.00021231	-0.000373205	-0.00120429	0.00067555	-0.00274002	0.000625495	-0.000100957	-0.0018935	-0.00663646	-0.00769207	0.0020396	0.000604739	0.00119787	-0.00694539	-0.00109147	-0.000185105	-0.0013746	-0.00602869	0.00281144	0.00672098	0.0166168	0.0510484	-0.000195057	-0.000145219	-0.00105627	-0.00335315	-0.000256578	-0.000485194
logitSUR_perfecthealth	dqolwi22	-0.00211324	-0.00207344	0.00283638	0.00411607	0.00145353	0.00240245	-0.00614261	-0.0193213	0.00127926	-0.000747783	-0.00275885	-0.00492301	0.00100048	0.000633914	-0.000297104	-0.00445527	-8.40949e-05	0.0014434	0.00230223	0.00454309	-0.00230942	-0.00172736	-0.00144	-0.00239369	-0.00155859	-0.00529223	-0.00137337	-0.00498495	-0.00452113	-0.00586231	-0.000665399	-0.00266382	-0.00419987	-0.00281342	-0.00129564	-0.00242386	0.0002564	0.00152929	0.00151209	-0.00413418	0.000146955	0.00695518	0.00749458	0.0235164	-0.00195994	-0.00648922	-0.00079613	0.000546835
logitSUR_perfecthealth	dqolwi23	-0.00282327	-0.00262102	-1.0866e-05	0.000397529	-0.0016245	-0.0045406	0.00227809	0.00935377	0.00197353	0.00206356	0.00140325	-0.00166436	-0.00311668	-0.00420235	0.00217521	0.00509732	5.56601e-05	-0.00209843	-0.000394121	-8.13722e-05	-0.00121049	-0.00319991	-0.00152954	-0.00219897	0.000354837	0.00182242	0.00166567	0.00493925	0.00158085	0.00264909	-0.000950129	0.000895424	-0.00638042	-0.00879009	-0.000593963	-0.00271208	-0.00279907	-0.00731277	-0.000532772	0.0011471	0.00271188	-0.00428608	-9.42936e-05	-0.00238564	0.0115869	0.0303483	-0.000521141	0.00026206
logitSUR_perfecthealth	_cons	-0.00170981	0.00126812	-0.00480233	-0.00587476	-0.000893838	-0.0023224	-0.00558377	-0.00753291	0.00148637	0.000862948	-0.000462669	-0.00198613	0.0039878	0.00466935	0.00146063	-0.00276673	-0.000748484	-0.00179214	-0.000805388	3.78421e-05	-0.000952238	-0.00299433	-0.0129748	-0.0113041	-0.00210442	-0.00167278	-0.00156825	0.00235134	0.00124105	0.00327871	-0.00628474	-0.00656221	-0.00674314	-0.00704816	-0.00101705	0.00374887	-0.00698967	-0.0111776	-0.000802985	-0.00224317	0.00353738	0.00844248	-0.00389405	-0.000702212	-0.000211048	0.00206353	9.48752e-05	-6.15108e-05
imperfectSUR_mean	dqolIscore	-1.82662e-05	-0.000149673	1.60297e-05	-0.000202152	-0.000151883	-0.000127349	-6.74646e-05	-0.000434824	-0.000423938	-0.000447002	8.50871e-05	0.000415497	-5.89927e-05	-0.00020573	0.000211245	0.000531551	-1.31414e-05	2.02404e-05	0.000117615	-2.38967e-05	4.59074e-05	0.0001269	0.000282958	0.000363418	1.4437e-05	8.16872e-05	0.00010708	3.41843e-05	-9.67048e-05	-0.000452154	-0.000236764	-9.56168e-05	0.000226735	0.000530773	-2.47023e-05	-0.000130888	-0.000112179	-8.35372e-05	0.000101006	0.00026221	-6.86292e-05	-4.19631e-05	1.82483e-05	-8.81258e-06	3.77673e-05	-9.81352e-05	-4.77559e-05	-3.57922e-05
imperfectSUR_mean	_Idqol1a_2	-0.0010882	-0.0013246	0.00116153	0.00135187	0.000538222	0.00152456	0.000805937	-1.52218e-05	0.000475022	0.000591128	0.000587267	0.000697207	-0.000228045	-0.001128	-0.000659956	-0.000289616	-0.000190329	-0.000671671	9.10747e-05	9.89167e-05	0.000260598	0.000765193	-3.86196e-05	0.000311205	-0.000123007	-0.000121522	-0.000106804	0.000335506	-0.000604821	-0.000243337	0.000369041	-9.25104e-05	0.000322088	0.000606168	-0.00053092	-0.000907384	0.000181373	-0.000239758	-0.000494383	-0.00173563	0.000344968	0.000243425	-0.000120867	7.46779e-05	0.000222718	0.000604209	-7.85413e-05	0.0001192
imperfectSUR_mean	_Idqol1a_3	-0.00122289	-0.000896183	0.0014486	0.00261112	0.000981477	0.00207613	-0.000155737	-0.0010159	-0.000145519	-0.0021475	-3.79023e-05	-0.0011385	-0.000335051	0.000210084	-0.000496518	-0.000814441	5.15565e-05	-0.000945571	0.000261252	0.000116106	0.000798814	0.00174746	-0.000390294	-3.99606e-05	0.000366697	-4.40095e-06	4.55619e-05	0.000535967	-0.000649591	-0.000752053	0.000154134	-0.000477963	0.000555082	0.00263491	-0.000226264	-0.000439264	0.000395398	-0.000771376	-0.000473864	-0.00144026	0.00052846	-0.00028459	-0.000596166	-0.000356627	-0.000583116	-8.32448e-05	-1.20191e-05	0.000366493
imperfectSUR_mean	_Idqol2a_2	0.00042685	0.000991883	0.000191263	0.000885145	0.00022895	-0.000431218	0.00245651	0.00222648	0.00126296	0.000971449	4.30407e-05	0.000261721	-0.000888689	-0.000703155	-0.000465694	-0.000656545	-0.00024972	4.50508e-05	0.000826992	0.000998534	-0.000220802	0.000109846	0.000105936	-2.65063e-05	0.00020034	0.000113178	-0.000262264	-0.000338595	0.00165318	0.00220661	-0.000169958	-5.95453e-05	-0.000531876	-0.00264117	-0.000113364	0.00039834	-0.000506045	-0.000762622	0.000369117	0.000512471	-0.000980645	-0.000746722	6.45229e-05	0.000134589	0.000483454	0.000494627	0.000106298	0.000167718
imperfectSUR_mean	_Idqol2a_3	0.000984983	0.00231294	0.000617511	0.0017535	-1.77524e-06	-0.00163795	0.00216758	0.00226501	0.00103286	0.00163561	-0.000253229	-0.000949682	-0.00080338	-0.000125013	-0.000916374	-0.000910034	-5.84788e-05	0.000573872	0.00162791	0.00196994	-0.000504011	0.000141169	-0.000355087	-0.000275666	0.00032701	-0.000637849	0.000202309	-0.000148622	0.00151508	0.00197646	7.76955e-05	0.000506164	-0.00160462	-0.00461747	-5.58359e-05	0.000258329	-0.000903688	-0.00154902	-2.95329e-05	-0.000666041	-0.00105963	-0.00130662	0.000121205	0.000285818	0.000739404	0.00182384	0.000224264	0.000342055
imperfectSUR_mean	_Idqol3a_2	0.000810088	0.00111048	-0.000261414	-0.000128611	0.000106594	-0.00054549	-0.000570745	-0.00035318	-0.000349951	-0.000368585	-0.000176918	3.30142e-05	0.000450089	0.000429653	-0.000217372	-0.000339171	-0.000116433	-0.00028545	-0.000257642	-0.000730094	-0.000585892	-0.000538321	-0.000644288	-0.000258332	0.000510944	0.000696881	0.000181727	0.00026367	-0.000119826	0.00192293	-0.000435759	-7.744e-05	-9.44837e-06	-0.000804341	0.000350732	0.000574288	-0.000156698	-9.5398e-05	-0.000391034	-0.00110976	-0.000704111	-0.000539537	-9.16136e-05	0.000155827	0.000140795	-0.000216199	9.08088e-05	-2.10678e-05
imperfectSUR_mean	_Idqol3a_3	0.00142533	0.00214508	-0.000398354	-0.00182715	-0.000554194	-0.00215876	-0.00136423	0.000414358	-0.000376408	0.00158333	0.000137801	0.00124813	0.000300096	0.000297456	0.00110648	0.00237013	-0.000533336	0.000221553	-0.000337104	-0.000346843	9.77222e-05	-0.000403955	8.80263e-05	0.000837923	0.00016057	-0.000923403	0.000537743	-0.000142199	-0.00102968	0.000638024	-0.000189521	0.000546441	0.000144927	-0.00215895	-0.000452027	-0.00118158	-0.0003756	-2.71056e-05	-0.000305592	-0.000648925	-0.000397531	-0.00105683	0.000154452	0.000704649	-0.0005051	-0.000950393	0.000172646	-0.000270719
imperfectSUR_mean	_Idqol4a_2	-0.000276884	-0.00113061	0.00192801	0.00312336	0.00168587	-0.000279343	-0.00274218	-0.0175415	-0.00658171	-0.00409827	0.000364637	0.00387633	0.000819035	0.00223906	-0.000415752	-0.00248175	-0.00159224	-0.00203211	0.00295429	0.00265263	-0.00193748	-0.00122716	0.000855091	0.00449177	-0.000579435	-0.00398498	-8.74743e-05	0.000180869	-0.00141055	-0.000726177	-9.19763e-05	-0.000807147	0.00147058	0.00212164	-0.00110555	-0.000409891	-0.0016601	-0.00096551	-0.00108822	-0.00089624	-0.00289324	-0.00200379	-0.000595272	0.00118863	0.000872873	3.16307e-05	-0.000378064	-0.000189477
imperfectSUR_mean	_Idqol4a_3	-0.00199955	-0.00144591	-0.000310026	-0.0015923	-6.9577e-05	-0.00113292	-0.0181723	-0.0195856	-0.00199422	-0.00174733	0.00235305	0.00649351	-0.00166871	-0.00277425	4.2132e-05	-0.002458	0.00254423	0.000790333	0.000715129	0.0043938	0.000129452	0.000348576	-0.000456431	-0.00160516	-0.00154762	-0.00365234	-0.000115576	0.00133261	-0.000294375	-0.00232435	0.000627352	0.00010397	0.0107407	0.0164087	0.00118639	0.00223865	-0.00131061	-0.00213508	-0.00207427	-0.0016871	0.00169867	0.00323335	0.00210709	0.00410393	-0.00177436	-0.00148248	-0.000318383	-0.000367696
imperfectSUR_mean	_Idqol5a_2	0.000362609	0.0012093	-0.00033198	-0.000111956	-0.00110237	-0.00236151	0.00215062	-0.00334502	0.0017298	0.000148519	0.00237066	0.00447844	-0.00140604	-0.00387653	-0.000990107	-0.000128182	0.00099534	0.00185114	0.000561358	0.00163175	0.000784418	0.00188901	0.00120343	0.00267372	-0.000621628	-0.000131245	-0.00110738	-0.00129208	0.000233701	0.000199769	0.000241012	-3.08531e-05	-0.00164337	-0.00531144	-2.37709e-05	-0.000827538	0.000253291	0.000208336	-0.00012732	0.000682522	0.00131768	0.00286132	0.000677009	-0.000201869	-0.00101665	-3.47601e-07	5.62973e-05	-1.7413e-06
imperfectSUR_mean	_Idqol5a_3	-0.000740335	-0.000425248	-0.000253885	-0.000502818	-0.000103722	0.000287431	0.00233835	-0.00391766	-0.000634602	-0.00545411	0.00283843	0.00922317	-0.00164615	-0.00723652	-0.00195139	0.000290554	-9.59937e-06	-0.000312652	-0.000749674	-0.000641135	0.000816279	-0.000235955	0.00113969	0.0017984	0.000865444	0.00286206	-0.00172677	-0.00345769	-0.00111154	0.00214986	7.41339e-05	7.44834e-06	0.00167748	-0.00776423	0.000733519	0.00259361	-0.000278052	-0.00114186	-0.000306076	-0.000686694	0.00205916	0.0114657	0.00107528	0.000433877	-0.000167866	0.00101015	-0.000163602	-7.8985e-05
imperfectSUR_mean	_Idqol6a_2	0.000561188	-0.00078602	0.000262792	0.000362035	-0.000218835	0.000190834	0.00113229	0.001053	0.00170794	0.00261032	-0.000238651	0.000738285	1.9867e-05	-0.00147331	0.00132693	0.0038824	-0.000587949	-0.000423839	-0.00110021	-0.00181732	0.000182903	0.00070683	0.000320874	-7.23844e-05	1.5465e-05	-0.000200019	-0.000473343	-0.00115413	0.000453769	0.00105584	9.91398e-05	3.76107e-05	-0.000413452	-0.00250305	-4.21474e-05	0.000413974	-0.000216919	-0.00060091	0.000361028	0.000311304	-0.000649297	-0.00142651	0.00010601	2.87769e-05	0.000202742	-0.000105092	1.97854e-05	1.01904e-05
imperfectSUR_mean	_Idqol6a_3	0.000668182	-0.00296136	0.00101509	0.000456155	1.93967e-05	0.00222543	0.00209715	0.00383187	0.00318647	0.00421864	-7.48417e-05	0.00148606	7.14156e-05	-0.00137779	0.00249027	0.00613085	-0.00228929	-0.00252937	-0.00298324	-0.00486735	0.000148718	-0.000289974	0.00172813	0.00162035	0.000760624	0.000837558	0.000150107	0.000850997	0.00232337	-0.000536305	8.21859e-05	-0.000448938	-0.00412568	-0.00857248	-0.00109391	-0.000715861	-0.000453269	-0.0001103	0.000593703	0.000755952	-0.00183143	-0.00243679	-0.000268202	-0.000706173	0.000375301	-0.000413271	-0.000273289	-5.10952e-05
imperfectSUR_mean	_Idqol7a_2	-2.82379e-05	-8.10791e-05	-0.00057684	-0.000811601	0.000563354	0.000461293	-0.000922144	-0.000696699	-0.000909194	-0.00127251	-0.000728606	-0.000672574	-1.09799e-05	0.00106265	0.000592646	-0.000944895	-0.000507624	-0.00115816	-0.000215136	-0.00048413	0.000218356	-0.000844225	-0.000386479	-0.000526542	-0.000190794	-0.000378903	0.000472329	0.00107884	0.000212418	0.000684717	6.7768e-05	0.000562055	0.00031329	0.00321844	0.000650655	0.00174139	-7.5545e-05	-0.000457803	4.60099e-05	0.00024971	-0.000696297	0.000448829	-0.000250819	-0.000433132	0.000448039	0.000354957	-3.48041e-05	-6.36279e-05
imperfectSUR_mean	_Idqol7a_3	0.000591509	0.00135761	-0.000336674	-0.000385914	0.000685462	0.000747298	-0.000656456	-0.00241717	-0.00256863	-0.00465993	-0.00114896	-0.000407495	0.000553288	0.00201488	0.000845516	-0.00315269	-0.00068002	-0.00128819	0.000575557	0.000389265	-0.000122931	-0.00136919	-0.000200264	0.000260541	-0.00121056	-0.00238799	0.000904935	0.000546653	-0.000545695	0.00032294	0.000105177	0.000405012	0.001334	0.00880833	5.05223e-05	0.00123225	0.000276465	-0.000149882	-0.00107343	-0.000322607	-0.00122635	-0.0012811	-0.000319276	0.000649326	0.000367789	0.000371742	2.25381e-05	-0.00010684
imperfectSUR_mean	_Idqol8a_2	-0.000283677	-4.89588e-06	-0.000326387	-0.00121608	-0.000387907	0.00050319	-0.00234068	-0.00170892	0.000536004	0.000240151	0.000872225	0.00117362	0.00102633	0.00180926	-0.00141165	-0.00444532	6.47758e-05	0.00011736	-0.000606133	-0.00071905	0.000458435	-6.42288e-05	0.000302626	0.000594706	0.000321348	0.000615784	8.80441e-06	0.00141771	-0.000447051	-0.00147281	4.75469e-05	0.000221622	-0.000921488	2.00487e-05	-9.90248e-05	-0.000687079	-0.000119949	0.000467306	0.000264895	0.000271027	-0.000379293	0.000111818	0.000695849	0.000670143	-0.00013238	-0.00107092	-4.32413e-05	-0.000268437
imperfectSUR_mean	_Idqol8a_3	-0.00109064	-0.00103651	-0.000923015	-0.00135117	-0.000376395	0.000767922	-0.00104661	-0.00176624	0.00101055	0.00172615	0.00208559	0.00276452	-0.000304661	-0.000884888	-0.00410524	-0.0111406	0.00181242	0.00299993	0.000545699	0.000935563	0.00039641	0.00158865	-0.000724644	-0.000516455	0.00153529	0.00238793	-0.000977073	-0.00073631	0.000569327	0.00125973	0.000214264	0.00101013	-0.0012512	-0.000440547	-0.000156919	-0.00126975	-0.000473055	-0.000126473	0.000329912	-0.000385455	-0.000578632	0.000977623	0.001496	0.00131581	0.000746623	0.00025893	-0.00029914	-0.000239714
imperfectSUR_mean	_Idqol9a_2	-8.24278e-05	-8.20671e-05	-0.000655354	-0.000355122	-0.000341255	-0.00109313	-0.00211608	-0.0014934	-0.00102092	-0.00062218	6.41009e-07	-0.0015013	-0.000377207	-0.000420707	0.000198353	0.00203558	-0.000187481	0.000582188	0.000954029	0.000952978	0.000183119	0.00177432	0.000193832	-3.33675e-05	-0.000434218	0.000117031	-0.000124477	-7.38915e-05	0.00017477	-0.000769675	-0.000143427	1.91213e-05	0.000651723	0.000739303	0.00116096	0.0013747	0.000293283	0.000239492	0.000127571	0.000195977	0.000437042	-0.000365542	-0.000142213	-0.000783307	-1.44418e-05	-0.000581819	6.34655e-05	-1.34071e-05
imperfectSUR_mean	_Idqol9a_3	0.000225864	-0.00152131	-0.00100839	0.000380967	-0.000574708	-3.24282e-05	-0.000924054	-0.00347848	-0.000466758	-0.00108413	0.00105584	-0.00142281	0.000125561	-0.00052163	2.41055e-05	0.00347002	0.000238719	0.000763401	0.000340884	-0.000356569	3.18657e-05	0.00184754	0.000212443	0.000648004	-0.000231421	0.0014074	-0.000578822	-0.000699282	-0.000318818	-0.00199212	-0.000358918	-0.000349899	0.000951604	0.000116171	0.00139719	0.00119131	-0.000163622	0.000690608	0.000273781	0.000923295	0.00104345	-0.000639807	2.70292e-06	-0.00123695	-0.000547689	-0.00156525	-8.20809e-05	-3.42564e-05
imperfectSUR_mean	_Idqol10a_2	-0.000128033	-0.000785592	0.000230539	0.000878495	-0.000434829	-0.000379356	0.00105259	0.000939176	-5.63365e-05	-0.00228058	-0.000567703	-0.000690505	0.000176288	0.000493301	-0.000267382	0.00113555	0.000192049	0.00040023	0.000704414	0.0011133	-0.000608981	0.000310692	0.000314883	4.03484e-05	0.000539689	0.000620606	0.000127228	-0.000438161	-0.000334476	-0.000992599	9.33385e-05	-0.000715274	-4.43138e-05	-0.00075068	-0.000264356	-0.000694833	0.00021747	0.00058686	0.000267471	0.000728636	-0.000142562	0.000138529	-0.000424192	-0.000209683	0.000586135	8.14492e-05	-1.90351e-05	9.31788e-05
imperfectSUR_mean	_Idqol10a_3	-0.000171712	-0.000971539	-0.000106403	0.000817583	-0.00069617	0.000162363	-0.0010497	-0.00168685	0.00091997	-0.00147031	-0.000789039	-0.00144799	-0.000405265	0.000626336	0.000405127	0.00105717	0.000508594	0.000685277	0.000600642	0.000617552	-7.68894e-05	0.000847312	-0.000417121	-0.000945294	0.000303656	0.00113746	-0.000336779	-0.000563695	0.000242345	-0.000900381	0.00023572	-0.00110662	-0.00123147	-0.000687421	0.000135226	-0.000543488	0.000720588	0.00109698	0.000541127	0.00114176	0.000383087	0.0013565	-0.000768176	-0.00107347	0.00103531	7.85872e-05	-1.17978e-06	0.000125386
imperfectSUR_mean	_Idqol11a_2	0.000489087	0.00032607	-0.000214068	0.000114048	-0.000899582	-8.58253e-05	0.000935633	-0.000421446	7.09441e-05	-0.000108914	0.000440308	-0.000672162	0.000456884	0.000661545	7.24487e-05	-9.37377e-05	0.000989118	0.00154801	-0.000570905	-0.00064033	-0.00043904	-0.000711835	7.57676e-06	1.28448e-05	-0.000522901	0.000353406	6.83424e-05	0.000746368	-0.000628313	-0.000771141	0.000234344	0.000121262	-0.00182108	-0.00239185	3.98772e-05	-0.000766471	9.91625e-05	0.000250488	-0.000527571	-0.00179466	0.000184546	-0.000506971	7.67392e-05	-0.000327392	0.000131777	0.000518389	5.13567e-05	-8.98966e-06
imperfectSUR_mean	_Idqol11a_3	0.000696791	0.00026076	-0.000167884	0.00101702	-0.00104704	-0.000714612	0.00223268	0.00163743	0.000915663	-0.0013778	0.000502561	-0.000942324	1.37797e-05	-0.000236894	-0.000338718	0.00191142	0.00207034	0.00318891	0.000562601	0.00148319	-0.000502785	0.000946502	-0.000491682	-0.000383345	4.14902e-05	0.00125585	0.000107992	0.000465538	0.00108073	-0.000424024	0.000445684	-0.000676032	-0.00203217	-0.00372269	-0.000539764	-0.00122585	0.000229584	0.000160853	-0.000209361	-0.000592744	-3.58105e-05	-0.00268821	-0.00013849	-0.000360469	-0.000216688	0.000608584	0.000152011	5.13154e-05
imperfectSUR_mean	_Idqol12a_2	0.000314047	-0.000120628	0.000297245	-0.000692232	-0.000327216	0.000433244	0.00225462	0.00198448	0.000777098	0.00102067	0.000250306	0.0010517	0.000145046	-0.000451421	8.64584e-05	-8.48859e-05	0.000397335	0.000551643	-0.000721607	-0.00172624	-0.000417965	-0.000790948	0.000547743	0.000867972	-0.000414645	-0.000183705	-0.000118233	0.000790645	-0.000771651	-0.00232467	-0.000342112	-0.000116543	0.00075709	0.00102975	-0.000380222	-0.000483789	-0.000254999	0.000166624	2.68933e-05	0.000156022	0.000219759	0.00089325	0.000326657	0.000333508	5.16365e-05	-0.000176333	-0.000132135	-0.000168901
imperfectSUR_mean	_Idqol12a_3	0.000117362	0.000108141	0.000567734	-0.000624487	0.000123738	0.000338383	0.00316722	0.00259056	0.00108861	0.00163365	-0.000578911	0.00211241	-0.000143046	-0.000849647	0.000631404	0.000947965	-0.000141377	-0.000639379	-0.000374357	-0.000849926	-0.000687349	-0.00152593	0.000528405	0.00105297	-0.000725179	-0.00113468	0.000349263	0.00163061	-0.000990185	-0.00280885	-0.000769909	-0.000622948	0.00107335	0.00177901	-0.00152911	-0.00116182	-0.000298998	-0.000412852	0.000385145	0.000972948	-0.000621719	0.00154529	0.000108438	0.00036491	0.000682084	0.000372328	-0.00029065	-0.000124029
imperfectSUR_mean	_Idqol13a_2	1.38566e-05	0.000904988	0.000233833	-0.000239037	0.000524074	0.000391021	-0.000644993	-0.00102633	-0.00133078	-0.000320502	-0.000582334	0.00019207	-0.000170849	-0.000895469	0.00062172	0.0016899	-0.000892201	-0.0007029	0.000163928	-0.000437591	-0.00017213	-0.000437099	0.000471885	0.000434501	-0.000345894	-0.000288366	0.000480138	-0.000340551	-0.0010216	-0.000722909	-0.000116465	6.32702e-05	0.000667902	0.000481775	0.000490073	0.000449797	-0.000417424	-0.00169862	-9.33307e-05	6.3907e-05	0.000469841	0.000583468	5.97062e-05	0.00111297	0.000284497	0.000725307	6.29296e-05	-5.75063e-05
imperfectSUR_mean	_Idqol13a_3	0.000230565	0.000626847	0.000332004	0.000154747	0.00046139	-0.000789112	-0.000994091	-0.0014916	-0.00149707	-0.00132706	-0.000404436	0.000646602	-0.000232904	0.000180435	0.0013857	0.00234486	-0.00119089	-0.000737786	0.000485298	0.00110412	0.000419747	0.000599371	0.000507917	-0.000255009	2.56371e-05	-0.00182315	-0.00075621	-0.00324022	0.000798319	-0.00143039	-0.000695436	0.000115598	0.000442159	-0.000147378	0.000705754	0.00104271	-0.000650913	-0.00182284	-9.52853e-05	0.00214084	0.000422824	0.00105033	0.000191319	0.00174338	0.000257673	0.000620118	4.85438e-05	6.86744e-05
imperfectSUR_mean	_Idqol14a_2	-0.000397309	-0.000117629	-0.000178374	2.3919e-06	0.000276519	0.000188799	-0.00129518	-0.00094167	-0.001461	-0.00179298	-0.00041257	0.000300358	9.775e-05	0.000733686	-0.000188055	-0.000443037	-0.000441911	-0.000883188	0.000282888	-0.000430839	0.00083479	0.000564298	-0.000124588	0.000583768	0.000252389	-0.00111991	-0.000104212	-0.000176526	-0.000212124	0.000111821	-0.000304834	-0.000534276	-6.15239e-05	0.00250658	0.000133281	-0.000167063	0.000157122	0.000114846	-0.000168335	-0.000510539	0.00077518	0.000516983	0.000262442	0.000697282	-0.000217937	-0.000294944	-5.40441e-05	3.10008e-05
imperfectSUR_mean	_Idqol14a_3	-0.000313374	0.000427772	1.92706e-05	-0.000168565	0.000303547	-0.00101275	0.00030171	0.00151338	-0.00105608	-0.000834697	-0.000254958	0.00138604	-2.66617e-05	5.3807e-05	0.0012671	-0.000242444	-0.000440242	-0.000581659	-0.000836835	-0.00173463	0.0017659	0.00134431	0.000337435	0.00145005	-8.27042e-05	-0.00285087	0.000397275	0.000646125	0.000427515	0.00187773	-0.000847261	-0.000743812	0.000201424	0.00372094	0.000311584	-0.000166527	-0.000682786	-0.00143764	-0.00155087	-0.0024199	0.00117796	0.000491081	0.000465329	0.00108011	-0.000869912	4.30796e-05	-0.000164481	0.000100734
imperfectSUR_mean	_Idqol15a_2	-2.07437e-05	3.45604e-05	0.000290924	0.00111529	0.000217336	0.000170517	-0.000481665	-0.00196124	0.000644473	0.000923849	0.000431395	-0.000865522	-7.45423e-06	0.000158107	-0.000757307	-0.00151848	0.000427674	0.00121013	-0.000560578	-0.000493689	-0.000345864	-0.000591912	-0.000222287	-0.000259239	0.000353726	0.000629679	0.000538834	0.00133069	1.10279e-05	0.000793683	0.000224685	0.000627805	0.00032405	-0.00120942	0.000229461	0.000640947	-0.000259529	0.00035363	-0.000229704	-0.00135634	-0.000546875	-0.001535	0.000270721	-0.000528905	-0.000239804	-0.000113729	2.7659e-05	2.7705e-05
imperfectSUR_mean	_Idqol15a_3	0.00010473	-0.00142147	0.000811789	0.00212749	0.00113849	0.00212187	0.000606369	-0.00310502	0.00087415	-0.000978468	0.00071496	-0.00256624	0.000854496	0.000396787	-0.000466895	0.000625807	-0.0014842	-0.00104531	-0.0014714	-0.00190808	-3.94421e-05	-0.0010943	-2.24202e-05	-0.000492747	0.000198097	-0.000391431	0.00150109	0.00328771	6.68472e-05	-0.00028796	-0.000751747	0.000231749	0.00114208	-0.00279102	0.000801388	0.00271708	-0.00143555	-0.00102171	3.82632e-06	-0.00273362	-2.72275e-05	-0.0012507	5.27102e-05	-0.00131412	-0.000470686	9.42663e-05	-5.36927e-05	4.51602e-05
imperfectSUR_mean	_Idqol16a_2	0.00028633	0.000180917	-0.000172659	-0.000514228	-0.000432874	2.65109e-05	0.000281465	0.000784494	0.000181401	0.000245386	0.000174434	0.000249304	-5.35291e-05	-0.000280872	0.000107496	0.000297427	-0.000119725	-0.000382251	0.00067019	0.00109522	0.000239091	0.000396715	-0.000481605	-0.00112572	1.5119e-05	-0.00011327	-0.000719098	-0.00176467	0.000516474	0.00061701	-0.000137494	0.000286707	-0.000358075	0.000177781	-0.000359314	7.03672e-05	0.00032899	0.000204996	0.000289409	0.000484162	-5.38107e-05	0.000198476	7.62331e-06	-8.15398e-05	0.000107887	0.000411068	5.98064e-05	7.35209e-05
imperfectSUR_mean	_Idqol16a_3	-0.000267752	-0.000769044	-0.000232459	-0.000298758	-0.000416706	0.000503489	0.000355377	0.00106261	-0.000907369	-0.00140189	-0.000300462	-0.000454868	0.000804515	0.000355728	0.000167508	0.00108531	0.000541723	0.000385142	-0.000269136	-0.000831297	-7.19927e-06	-0.0008651	0.000361668	-6.49404e-05	-2.73691e-05	0.000990972	-0.000664403	-0.00179882	-0.000387941	0.000464185	0.00023996	-1.90813e-06	-0.0007392	-0.00152656	-0.000308551	0.000114624	0.000677414	0.000972874	0.000108374	3.3919e-05	-0.000131626	0.00117175	0.000239338	-0.000571547	-0.000311056	4.84221e-06	3.25354e-06	4.86932e-05
imperfectSUR_mean	_Idqol17a_2	-0.000706593	-0.00087202	-0.000768621	-0.00194482	-0.000282522	-0.000309749	-0.00138972	0.00316708	-0.000131926	-0.00017778	-0.000219945	-0.000579122	0.000384009	0.000649964	0.000648957	0.00115261	0.000907757	0.0010269	-0.000597388	-0.00115662	0.000507734	0.00111569	-5.68381e-05	-0.00030193	-0.000150002	0.000563223	0.000130207	-0.000211745	-0.000445253	-0.000274182	0.000208873	-0.0003159	0.0017039	0.00191602	0.000648345	0.000470748	0.000626347	0.00120785	0.000214881	0.000150739	0.00156335	-0.000492818	-0.000411861	-0.00140674	-0.000828917	-0.00146853	-3.20246e-05	-0.000197046
imperfectSUR_mean	_Idqol17a_3	-0.00110442	0.00111187	-0.00247326	-0.00557174	-0.00081569	-0.00264268	-0.0026389	0.00508074	-0.000338236	0.00280565	-0.00117554	-0.0018918	0.00135356	0.000913255	-0.000396177	0.00150421	0.00172246	0.000608827	-0.00036535	-0.000693646	-0.00117037	-0.00119334	-4.546e-05	-0.0016008	0.000194107	0.00343759	0.000164225	-0.00172569	-0.00497582	-0.0036141	0.00053342	-0.000825547	0.00447163	-0.000403405	0.00149	0.000763242	0.00259492	0.00447657	0.00168558	0.0033195	0.00259111	0.00477607	-0.00109336	-0.00170697	-0.00104032	-0.00218922	0.000227418	-0.000777666
imperfectSUR_mean	_Idqol18a_2	0.000155301	9.82631e-05	-5.01682e-07	0.000698691	0.00017384	-0.000228083	-0.000634836	0.00222025	6.4219e-05	0.00107343	0.000210952	-0.00174471	0.000654782	0.000694043	-0.000546347	-0.00193064	0.000866681	0.000704625	-0.000528438	-0.000165271	0.000199367	-0.000291282	-0.000816735	-0.00208249	0.000718348	0.000787153	-6.46075e-05	9.20334e-05	0.000507837	0.00147462	-2.91676e-06	0.000277828	-0.000412228	0.000489249	-0.000122842	-0.000320705	-0.000182269	-0.000159359	-0.000450881	-0.0012247	0.00045133	-0.000407239	0.000458578	0.000458455	-0.000147729	0.000708872	9.95577e-05	0.000166211
imperfectSUR_mean	_Idqol18a_3	-0.000679036	-0.000498753	3.9643e-05	0.00106509	0.000458792	-0.000163642	-0.000367316	0.00372111	0.000261824	0.00232828	-0.000493623	-0.00356448	0.0011872	0.00210936	-0.00154159	-0.00478581	0.00109307	0.00108505	-0.000905512	-0.000184466	-2.55148e-05	-0.000422415	-0.000955482	-0.00279101	0.000912666	0.00111914	0.000108534	0.000670941	0.000717694	0.00352665	0.000440681	0.000880678	7.05434e-05	0.000606166	-0.000123861	0.000276271	8.91013e-05	-0.000199935	-0.0011191	-0.00384172	7.40706e-05	-0.000129269	0.000536711	0.000479469	-3.68272e-06	0.000309045	4.59961e-05	0.000317635
imperfectSUR_mean	_Idqol19a_2	-0.000550322	-0.000285919	-0.000651807	-0.00110774	1.57758e-05	0.000409712	-0.00237176	-0.00265109	1.28286e-05	0.000415503	-0.000355404	-0.000629436	-0.000383009	0.000150934	0.000595151	-0.00058122	0.000460324	0.000428356	0.000395896	0.000898246	0.000473218	0.000640412	-0.000151738	-9.78667e-05	0.00024767	0.000402914	-8.58809e-05	-0.00104716	0.000214606	-0.000614867	0.000234185	0.00033742	0.00082519	0.00293853	-7.76065e-05	0.00017873	0.000323315	0.000441917	7.11836e-05	0.00112412	-0.000473769	1.93001e-05	-0.000365013	-0.000726373	-0.000496787	-0.000977559	-0.000160971	-6.73594e-05
imperfectSUR_mean	_Idqol19a_3	6.60249e-05	0.000640661	-0.00121609	-0.00220287	-0.000287436	-0.000240581	-0.000547466	-0.00255214	0.00140465	0.00402113	0.000117593	0.00052453	-0.000994133	-0.00127804	-0.000226621	-0.000339607	0.000670512	0.000871819	0.000461108	0.000230135	0.000613645	0.000856991	0.000570156	0.000705223	-0.00070908	-0.000317069	-0.000268981	-0.00175306	0.000271888	-0.00103562	0.000108423	0.000440339	0.00138255	0.00504941	0.000454584	0.000463936	-5.26324e-05	-7.81508e-05	0.000158615	0.00176282	0.00105846	0.00191681	-0.000943089	-0.00161126	-0.000859321	-0.00172297	-0.00022141	-0.000213984
imperfectSUR_mean	_Idqol20a_2	-0.000237573	0.000251469	1.05723e-06	-0.000580996	0.000397342	0.000633589	-0.000662719	-0.000896988	-0.000114431	0.000369949	0.000788212	0.00181327	-0.000324586	-0.00134818	0.000138634	0.000405481	-0.000348794	-0.000119094	0.000658068	0.00114619	-0.000379603	-0.000570977	0.000224067	0.000443674	0.000246045	-0.000354013	8.82032e-05	-0.000875793	0.000344934	-0.000848699	-0.000332081	-4.48173e-06	0.000344118	0.000605034	-0.00060469	-0.001116	-0.000513895	-0.000293406	0.000106863	0.00143631	-0.00115202	-0.00195434	0.000151067	0.000864209	0.000314579	0.000604767	-0.000125722	-3.09133e-05
imperfectSUR_mean	_Idqol20a_3	-0.000855528	0.000633218	-3.69881e-05	-0.00175333	0.000678978	0.00106016	-0.000491148	-0.0020867	-0.00199158	-0.00167169	0.000409377	0.000475206	0.000549808	4.52944e-05	-0.000308681	-0.000993774	-0.000873978	6.01112e-05	0.0018546	0.00337438	-0.00143821	-0.0014789	0.000514395	0.00151793	-0.000145513	-0.000511223	-0.00074706	-0.00212954	-0.00133227	-0.00397315	-0.000409108	-0.000550496	-0.00037828	0.00291935	-0.00120858	-0.00325528	0.00014236	0.000989552	0.00104333	0.00340665	-0.000911472	-0.00197952	0.000567608	0.00194461	0.000522907	8.46398e-05	-0.000254748	-0.000330785
imperfectSUR_mean	_Idqol21a_2	-0.000407717	-0.000189123	3.61956e-05	-1.08825e-05	0.000141637	-0.000208998	9.57751e-06	0.00254149	-0.000488889	0.000592653	-0.000925406	-0.00131404	0.000353618	0.000228998	-0.000196757	-0.00021763	-0.000303552	-0.00131729	-2.66426e-05	-6.66167e-05	-0.000483851	-0.000395955	-0.000683916	-0.00125113	2.75213e-05	0.000625787	0.000328279	0.000943495	-0.000498886	-0.000520362	-0.000130997	-0.000798699	0.000654514	0.00079948	0.000742724	0.000754106	0.000187848	0.000390462	-3.47698e-05	-0.000180607	0.000368397	0.00123666	6.26439e-05	0.000178889	0.000579525	0.000968527	-0.000127062	8.9976e-06
imperfectSUR_mean	_Idqol21a_3	-0.00144098	0.000433235	0.000812188	-0.000912828	0.0012911	0.000196167	-0.00422969	0.00456327	-0.00133868	0.00566955	-0.000986332	-0.000432518	0.000297679	9.18581e-05	0.00101645	5.43854e-05	-0.00220265	-0.00400891	0.000143417	-0.00010948	-0.000591557	-0.00170788	-0.00114949	-0.00157077	0.000435448	0.00257843	-1.84546e-05	3.50725e-05	-0.00327203	-9.92572e-05	0.000660775	0.0010597	5.74507e-05	-0.0031449	0.00078705	0.000243608	-9.07931e-05	-0.0001102	-0.000419809	-0.00194947	0.000265763	0.00142815	0.000332105	0.00112857	0.00106356	0.00158636	-0.000143031	3.50383e-05
imperfectSUR_mean	_Idqol22a_2	9.44804e-05	-0.000244274	-7.26025e-05	-0.000250962	-0.000409985	-0.000477041	-0.000119876	1.65858e-05	0.00120799	0.000910353	0.000544128	0.000371359	-0.000318159	-1.0306e-05	0.000283744	0.000529055	-0.000168058	-0.000316535	-0.000538719	-0.000454314	-0.00013719	-0.000409904	0.000279923	-0.000481525	-0.000222184	-8.45716e-06	-3.1881e-05	8.0965e-05	0.000314007	1.05065e-05	-0.000178381	0.00011737	-0.00012727	-0.00131247	0.000481458	0.000291965	0.000247667	0.000365039	0.000145873	0.000798423	0.000361201	0.000372146	-0.000230916	4.23866e-05	-0.000226688	-1.03248e-07	3.17936e-05	-7.9078e-05
imperfectSUR_mean	_Idqol22a_3	0.000421056	-0.000395149	-5.90604e-05	0.000171814	-0.00013068	-0.000208427	-0.000513565	0.000892242	0.000282421	-0.000169408	0.000267834	-0.000193514	-0.00028991	0.000106743	0.00106075	0.0015554	-0.0011606	-0.00220105	-0.000639997	-0.00118379	-0.000606729	0.000183926	0.000303841	-0.000548595	0.000207119	0.000269825	0.000255178	0.00114991	-0.00014763	-0.00024277	-6.19179e-05	-0.000438424	-0.00121506	-0.0027792	0.000490141	0.000954855	0.000398018	0.000326855	0.000788005	0.0019584	0.000236834	8.00066e-05	-0.00048075	0.000327215	0.000387649	0.000929246	4.33768e-05	6.40226e-05
imperfectSUR_mean	_Idqol23a_2	0.000543092	0.000166127	0.000642106	0.00115937	0.000260722	0.000117711	0.00265763	0.000961516	-0.000749877	-0.00174369	-0.000396362	-0.000533011	-0.000383191	-5.45614e-05	0.000694969	0.0013176	0.000232423	0.000402981	0.000256407	0.000510545	8.04513e-06	-0.000165015	0.000220027	0.000626659	-3.79812e-05	-0.000776962	6.37218e-05	-0.000597988	0.000458147	0.00034271	-0.000249442	-0.000372612	0.000360111	-0.000256328	-0.000792022	-0.000989813	-3.30511e-05	-0.00106144	0.000146864	-0.000124917	-3.45947e-05	-0.000558353	-0.000441338	0.000208637	-0.000713717	0.000353652	7.94682e-05	0.000112174
imperfectSUR_mean	_Idqol23a_3	0.000196933	0.000243526	0.000616806	0.00208574	-0.00032498	-0.000888542	0.00162486	0.000372709	3.96145e-05	-0.000945793	-6.31147e-05	-0.000497339	-0.00066259	-0.000901257	-0.000123431	0.000245512	0.0001932	-5.71964e-06	0.000575368	0.000758417	3.97338e-05	0.000607401	1.16908e-05	-8.31483e-05	0.000428743	-0.000836765	-0.000274977	-0.000794986	0.00141383	0.0024632	8.14362e-05	0.000152273	-0.000838433	-0.00130166	4.12249e-05	-0.00073675	0.000114656	-0.000795594	0.000207447	-0.000327852	3.58635e-05	-0.000295347	-3.13413e-05	0.00106839	6.72151e-05	0.00159054	0.000111786	0.000244864
imperfectSUR_mean	dqolwi1	-1.86309e-05	9.50039e-05	0.000110601	0.000233601	9.1992e-05	0.000212247	5.93773e-05	-9.55691e-05	6.84726e-05	-2.12869e-05	1.82224e-05	-4.71577e-05	-4.4354e-05	-9.18604e-05	-0.000152451	-0.000212789	0.000128977	-4.8866e-07	0.000127983	1.69851e-05	9.14861e-05	0.000256942	-0.000117025	-0.00019232	6.33774e-05	0.000219713	-9.13516e-05	-0.00017814	-0.000126661	0.000174319	9.44356e-05	7.62546e-05	0.000127445	0.000594115	-3.17465e-05	-8.71344e-05	-1.42596e-06	-0.000289357	-0.000178084	-0.000477133	9.65102e-05	0.000100324	-6.40245e-05	1.37618e-05	-0.000125287	-8.03904e-05	6.01801e-05	4.84089e-05
imperfectSUR_mean	dqolwi2	-3.35407e-05	0.000164352	0.000107248	0.000274401	-4.76075e-06	-0.000124356	-0.000339344	0.000137324	0.000179647	0.000264245	-0.00011019	-0.000272318	-0.000159557	3.2799e-05	-5.88096e-05	-7.17132e-05	3.46041e-05	1.89805e-05	0.000206871	0.000373247	-9.16472e-05	-9.89064e-05	-0.000141864	-0.000191665	7.7455e-05	-0.000166323	0.000120873	0.000169628	0.000202721	0.000147778	0.000108583	0.000122992	-0.000125565	-0.000417052	-4.759e-05	6.46949e-05	-2.46653e-05	-7.1766e-05	-6.45379e-06	-0.000181051	-0.000347092	-0.000427207	6.3869e-05	0.000102128	0.000122677	0.000244321	2.64234e-05	6.26067e-05
imperfectSUR_mean	dqolwi3	0.00019344	0.000373671	-4.97625e-05	-0.00037042	-7.2972e-05	-0.000320679	6.81627e-05	-4.72143e-05	-0.000126025	3.32287e-05	0.000170071	0.000396285	2.58816e-05	4.81916e-05	7.44669e-05	8.91964e-05	-5.53721e-05	0.000135331	-9.813e-06	-9.54305e-05	2.7803e-05	-6.08863e-05	0.000142762	0.000307407	-3.00092e-05	-8.96666e-05	2.75345e-05	-7.63374e-05	-0.000242386	-0.000184548	-8.63427e-05	-1.47031e-05	0.000155424	-0.000103498	-8.94576e-05	-0.000302021	2.48094e-05	0.000198112	1.43153e-05	0.000175739	9.77799e-05	0.000122709	-0.000151464	-9.25867e-05	-0.00010248	-0.000213062	8.47455e-06	-7.81913e-05
imperfectSUR_mean	dqolwi4	-0.000663873	-0.00022348	-0.000266376	-0.000793053	-7.60331e-05	-0.000383924	-0.00563043	-0.00348104	-0.000593992	-0.00029132	0.000291597	0.00137593	-0.000432527	-0.000589637	-6.63308e-05	-0.00113565	0.000602463	-9.16277e-05	2.78563e-05	0.00113931	0.000127054	0.000153906	-0.0002788	-0.000890858	-0.000140738	-0.000662285	0.000222944	0.00046168	-0.000227338	-0.000855755	0.00025597	6.80493e-05	0.00273681	0.00442767	0.000440623	0.00092987	-8.01637e-05	-4.02187e-05	-0.000249565	-0.000285976	0.000210307	0.000996029	0.000578427	0.00134418	-0.000516091	-0.000509493	-7.18921e-05	-7.87469e-05
imperfectSUR_mean	dqolwi5	-3.79496e-05	-0.000189696	3.39045e-05	-3.82441e-05	-8.96293e-05	0.000107474	0.000388208	-0.000690645	0.000172551	-0.000432776	0.000766894	0.0020393	-0.000377556	-0.00153647	-0.000282121	-3.02965e-05	-4.25355e-05	-0.000126062	-0.00020743	-0.000226574	0.000122843	1.62673e-05	0.000353982	0.000504317	9.96022e-05	0.000354407	-0.000269752	-0.000362131	7.47617e-05	0.000481294	-1.95867e-05	-4.12319e-05	-0.000195651	-0.00169838	3.29599e-05	0.000286216	-0.00020417	-0.00029323	-2.01901e-06	-6.01543e-05	0.000183118	0.001601	0.000219051	0.000261712	1.95719e-05	0.000338321	-4.32725e-05	-1.55629e-05
imperfectSUR_mean	dqolwi6	9.07812e-05	-0.000397199	0.000194034	0.000119898	-3.54031e-05	0.000231089	0.000376548	0.000426583	0.000788572	0.000958554	0.00010484	0.00048818	-6.65522e-06	-0.000437582	0.000224723	0.000736019	-0.000378213	-0.000515125	-0.000412726	-0.000609403	4.80361e-05	0.000146093	0.000196768	6.55975e-05	0.000133942	0.000166972	-8.3342e-05	8.74773e-05	0.000465219	5.90475e-05	4.87326e-05	-0.000128403	-0.000543887	-0.00101585	-8.96555e-05	9.12003e-05	-1.08832e-05	1.15055e-05	5.98581e-05	5.02484e-05	-0.000289971	-0.000454073	-4.89977e-05	-0.000136351	0.000146322	0.000113334	-2.8477e-05	3.74161e-06
imperfectSUR_mean	dqolwi7	0.000142898	0.000287253	-0.000153376	-0.000130598	0.000122624	2.99302e-05	-0.000214758	-0.000429835	-0.000398912	-0.000635256	-0.000193002	-0.00027918	0.000166865	0.000604993	0.000256662	-0.000163729	-0.000165467	-0.000208825	0.000116342	0.000132382	-6.67775e-06	-0.000261089	-1.61766e-05	0.000115212	-0.000231968	-0.000389521	7.60509e-05	9.81464e-06	-0.000229083	-0.00010168	-1.33633e-05	6.0577e-05	0.000256049	0.00111531	4.66898e-05	0.000270863	1.31252e-05	-3.47791e-05	-0.000138293	8.15672e-05	-0.000200292	-0.000232546	-1.80927e-05	0.000126767	1.86579e-06	-6.04448e-05	-6.78879e-06	-2.42124e-05
imperfectSUR_mean	dqolwi8	-8.26565e-05	-6.6e-05	-0.00012979	-0.000323585	4.87727e-05	0.000261536	-0.000244403	-0.000466323	-5.92723e-05	-2.24628e-05	0.000405455	0.000513625	1.9643e-05	0.000138369	-0.000483229	-0.00190136	0.000106593	0.000400586	-5.2396e-05	-7.2625e-05	4.36498e-05	1.01437e-05	-1.40147e-05	0.000104241	0.000225982	0.000312651	-4.56062e-05	-1.13271e-05	5.82873e-05	0.000105976	6.04259e-05	0.00019785	-0.000250905	-0.000114775	-5.1058e-05	-0.000251166	-4.30653e-05	9.74543e-05	-1.53438e-05	3.1848e-05	-0.000110316	0.000167995	0.000167328	0.000256532	2.46685e-05	-9.7239e-05	-6.67188e-05	-6.95382e-05
imperfectSUR_mean	dqolwi9	-8.39685e-05	-0.000533594	-8.22638e-05	0.000370988	3.27392e-06	-2.4716e-05	0.00021978	-0.00023216	-0.000154766	-0.000194553	-9.16443e-05	-0.000686457	1.0701e-05	-1.61736e-05	6.08549e-05	0.0010228	9.87937e-05	4.98889e-05	4.87898e-05	-9.36171e-05	1.87599e-05	0.000437264	-8.51691e-05	2.63069e-05	-2.29788e-05	0.000203767	-7.26566e-05	3.38806e-05	-6.13144e-06	-0.000237527	-0.000110376	-0.000185832	-1.03656e-05	-0.000618712	0.000153572	0.000237526	-5.89268e-05	3.44008e-05	0.000126178	7.47354e-05	0.000108874	-0.000153831	-2.26312e-06	-0.000287156	-2.17469e-05	-9.00977e-06	-4.23125e-05	5.41421e-05
imperfectSUR_mean	dqolwi10	2.38144e-05	-0.000110463	-5.00149e-05	0.000205526	-0.000118388	8.18882e-06	-0.000266122	-0.000215153	0.000150902	-0.000430974	-0.00019595	-0.000406418	-0.000110688	0.000112403	0.000172447	0.000576269	4.52508e-05	5.70448e-05	0.00023833	0.000318859	7.96222e-06	0.000200509	-6.78268e-05	-0.000152133	3.72416e-06	3.34031e-05	1.38685e-06	1.8187e-05	0.000120742	-0.000165382	-1.25248e-05	-0.000174305	-0.000309185	-0.000210159	-3.4088e-05	-0.000221401	9.19203e-05	-9.29895e-06	1.23396e-05	-3.70427e-05	9.27119e-05	-7.28976e-05	-6.83374e-05	-5.99079e-05	0.000144759	0.000150249	1.4447e-05	4.36723e-05
imperfectSUR_mean	dqolwi11	0.000126611	2.28867e-05	1.05971e-05	0.00029183	-0.000215983	-0.000185317	0.000840396	0.000662497	0.000102893	-0.000365086	0.000130458	-0.000106151	-0.000131964	-0.00046867	-9.56944e-05	0.000532082	0.000521311	0.000881977	9.19167e-05	0.000257911	-7.38037e-05	0.000238925	-8.68106e-05	-4.77487e-05	-3.57133e-06	0.000276293	3.85185e-05	0.000257759	9.75242e-05	1.67754e-05	0.000142541	6.80208e-05	-0.000190555	-0.000707643	-0.000170195	-0.000281293	-7.24159e-06	-0.000149953	-0.000126724	-0.000543327	-5.23252e-05	-0.000444184	-2.45233e-05	-0.000133482	5.40292e-05	0.000314838	3.65438e-05	5.01314e-05
imperfectSUR_mean	dqolwi12	-8.14085e-06	4.3876e-05	8.09189e-05	-0.000139542	-1.38606e-05	6.57215e-05	-0.000155728	0.000226176	9.6031e-05	0.000274165	3.96265e-05	0.000415615	3.42264e-05	-6.89645e-05	9.80148e-05	1.67334e-05	-3.51863e-05	-0.000202453	-0.00018504	-0.000198315	-7.58785e-05	-0.000267993	6.0941e-05	1.55711e-05	-6.10455e-05	-0.00012015	7.20955e-05	0.000256966	-8.32539e-05	-0.000192622	-7.85216e-05	-2.09487e-05	2.09237e-05	0.000103232	-0.000111005	-0.000147791	-0.000132534	-0.000148696	-8.90394e-06	-2.97109e-05	-7.5172e-05	0.000110936	0.000117363	0.000344779	3.58711e-05	3.18464e-05	-2.09697e-05	-1.82041e-05
imperfectSUR_mean	dqolwi13	-4.45941e-05	0.000187264	4.07625e-05	-2.33921e-05	4.65098e-05	-2.19277e-05	-0.000101297	-3.89219e-05	-0.00028181	-0.000114701	-8.17896e-05	9.13196e-06	5.90272e-05	6.59435e-05	4.7681e-05	-7.76964e-05	-4.42306e-05	6.39462e-05	2.75556e-05	0.000103916	9.92231e-05	0.00012796	5.8248e-06	-9.56892e-05	7.57986e-05	-0.000168326	-0.00011983	-0.000538869	4.56288e-06	-0.000201446	-9.45929e-05	-1.6221e-05	-5.38572e-05	6.4539e-05	5.55433e-05	-8.7079e-05	-9.33465e-05	-0.000205615	1.8953e-05	0.000321361	0.000134568	0.000315523	5.72256e-05	0.00027557	3.74001e-05	7.71628e-05	6.68202e-06	-3.48673e-06
imperfectSUR_mean	dqolwi14	3.41486e-05	-5.13811e-05	-3.71621e-05	-5.01769e-05	1.87989e-05	-0.000122106	6.89381e-05	-0.000111297	-4.29686e-05	9.72908e-06	-8.97624e-05	0.000185529	-3.91472e-06	-0.000133061	0.000257299	0.000305322	-0.000107386	-0.00010934	-0.000157286	-0.0003241	0.000255107	0.00027671	0.000113218	0.000265799	-5.34375e-05	-0.000312238	4.77848e-05	9.63779e-05	7.3437e-05	0.000117937	-9.66796e-05	-0.000154389	8.70603e-06	0.000497799	1.9797e-05	0.00010441	-5.3869e-05	-0.000177012	-0.000210685	-0.000309365	0.000173811	0.00023384	5.16899e-05	0.000102224	-0.000101456	-8.59552e-05	-3.75035e-05	-8.37804e-06
imperfectSUR_mean	dqolwi15	-5.80221e-05	-0.000328266	0.000107665	0.000345432	0.000246505	0.000346923	3.09249e-05	-0.000421911	-6.83685e-05	-0.000395162	3.86974e-05	-0.000594941	0.000177106	0.000153762	-0.000177486	-0.000486752	-0.000289774	-0.00020154	-0.000281861	-0.000407082	-3.73262e-05	-0.000355733	-2.44194e-05	6.2244e-06	0.000107647	-0.0001163	0.000270578	0.000586456	2.06201e-05	0.000204698	-7.61764e-05	0.000186309	8.04874e-06	-0.000395742	0.000149742	0.000416756	-0.000185984	-7.68295e-05	-5.42915e-06	-0.000327316	0.000135414	5.81054e-07	2.74954e-05	-0.000276723	-0.000170484	1.66019e-05	-2.29033e-05	1.74688e-05
imperfectSUR_mean	dqolwi16	-7.65279e-06	-4.94809e-05	3.32782e-05	-3.14616e-05	-5.02471e-05	5.93583e-05	0.000182598	0.00016182	-2.05435e-05	-7.52698e-05	-4.91775e-05	-4.08425e-05	8.49291e-05	-3.49187e-06	-3.96257e-05	5.9667e-05	6.35403e-05	6.95084e-05	6.32653e-06	-1.73888e-05	8.72685e-06	-0.000146072	9.26649e-05	5.70863e-05	-0.00010599	-5.22973e-05	-7.88222e-05	-0.000249046	5.03862e-05	0.000131959	1.11607e-05	-3.08376e-05	4.12995e-05	2.32893e-05	-3.3493e-05	6.6516e-05	6.33633e-05	2.69815e-05	4.80411e-05	0.000133637	-4.12969e-05	0.000185028	2.3464e-05	-6.64223e-05	-7.28976e-05	-8.72524e-05	-9.77509e-08	7.89641e-06
imperfectSUR_mean	dqolwi17	-0.000116707	0.000164781	-0.000270251	-0.000818895	-7.95252e-05	-0.000255005	-0.000691315	0.000732217	-2.75169e-05	0.000441221	-0.000220358	-8.79823e-05	0.000232065	0.000346973	1.84966e-05	0.00014183	0.000153272	-0.000111263	-0.000198239	-0.000285949	-9.89278e-05	-0.000277192	4.00552e-05	-0.000131418	2.50892e-05	0.000419526	6.4422e-05	-0.00013294	-0.000654325	-0.000674586	4.7973e-05	-0.000232475	0.000456818	-0.000370628	0.00016156	0.000189886	0.000282846	0.000564466	0.000209313	0.000453847	0.000391114	0.000727736	-0.000138008	-0.000199211	-0.000208806	-0.000515376	2.18379e-05	-0.000119481
imperfectSUR_mean	dqolwi18	-0.000139256	-0.000167742	2.53179e-05	0.00020023	4.96415e-06	-6.6849e-05	0.00015791	0.000378522	0.000169555	0.000388574	-5.99565e-05	-0.000431264	7.74444e-05	0.000263662	-0.000194682	-0.00067911	5.22612e-05	7.13788e-05	-0.000100877	2.86823e-05	-3.85281e-06	-9.40316e-05	-7.29124e-05	-0.000240834	7.25564e-05	7.34554e-06	2.82006e-05	7.08893e-05	0.000121227	0.000317998	5.36735e-05	0.000174706	6.23175e-05	0.000260966	2.46342e-05	-3.3412e-06	6.53243e-05	9.4164e-05	-0.000107753	-0.000217672	1.02165e-06	7.03532e-05	2.18439e-05	-1.86616e-05	-7.40409e-07	-6.63476e-05	-2.86899e-05	3.84441e-05
imperfectSUR_mean	dqolwi19	9.52569e-05	0.000148765	-0.00016481	-0.000257365	-9.23858e-06	-0.000100407	6.53584e-05	-0.000332195	0.00021282	0.000591061	5.84357e-05	3.6701e-05	-6.27616e-05	-9.52955e-05	-5.10536e-05	3.80947e-05	6.03487e-05	1.83681e-05	8.63429e-05	-7.30758e-06	0.000113731	0.000238064	-3.50613e-05	-2.84582e-05	-9.79956e-05	3.11776e-05	-9.9726e-05	-0.000354367	-1.34081e-06	-9.04965e-05	3.87429e-05	5.66876e-05	0.000261793	0.000807203	0.000158255	0.000227429	3.93004e-07	-1.93051e-05	2.3064e-05	0.000189236	0.000194609	0.000194193	-0.000149509	-0.000305153	-0.000108106	-0.000208967	-1.84792e-06	-3.30824e-05
imperfectSUR_mean	dqolwi20	-0.000144797	4.75303e-05	7.26502e-05	-0.000124192	0.000128192	0.000119278	-0.000143824	-0.000306882	-0.000351519	-0.00036043	0.000109632	-9.95825e-05	2.81233e-05	-6.12937e-05	-0.00011816	-0.000125914	-0.000203642	-0.000154033	0.000185775	0.000229264	-0.000260638	-0.000150297	2.27925e-05	0.00016399	2.14346e-05	2.20904e-05	-0.000111787	-0.000211567	-0.000217183	-0.000624482	-4.50561e-05	-3.80433e-05	-0.000158417	0.000258451	-8.01688e-05	-0.000418593	0.000114357	0.000364811	0.000263244	0.000572979	-7.25363e-05	-0.000248409	2.93855e-05	0.000219341	4.94506e-05	0.000106378	-2.96966e-05	-1.88532e-05
imperfectSUR_mean	dqolwi21	-0.000455213	-0.000188868	0.000101035	-0.000140203	0.000153942	1.05406e-05	-0.000537011	0.000818871	5.63031e-05	0.00125209	-0.000338145	-0.000402864	-5.98073e-05	-0.00022069	2.91651e-05	2.38785e-05	-0.000150993	-0.00042638	2.6264e-05	0.000164888	-0.00011928	-0.000164571	-0.000300682	-0.000571079	0.000201988	0.000578994	-6.5517e-05	-0.000140275	-0.000357493	0.000118806	8.57414e-05	0.000113319	0.000100587	-0.000512641	0.000107498	3.71569e-05	3.21813e-05	-8.7327e-06	4.22871e-05	-0.000145033	0.000136483	0.000501272	0.000117427	0.000127931	0.000261312	0.000313724	-6.60181e-05	1.94582e-05
imperfectSUR_mean	dqolwi22	0.000155057	0.000243418	2.64988e-05	-1.91152e-05	4.98709e-05	-8.71523e-05	-9.20591e-05	0.000165365	-0.000169853	-0.000366127	-4.57639e-06	0.000139358	8.18921e-05	0.000355183	0.000212916	4.33413e-05	-0.000229493	-0.000281965	3.00973e-05	3.36811e-05	-0.000100708	-0.000111787	0.000100502	8.9192e-05	1.91035e-05	-0.000134107	4.97539e-05	1.85782e-05	-0.000164071	-0.000156252	-1.31418e-05	-4.94527e-05	3.19999e-05	-0.000191546	1.41578e-06	0.000154884	9.34064e-06	-4.18308e-05	2.27957e-05	0.000186875	-7.79636e-05	-0.0002227	-4.91205e-05	4.37662e-05	7.1273e-05	0.000163907	1.84627e-05	-2.52663e-06
imperfectSUR_mean	dqolwi23	1.05447e-05	-5.38402e-05	2.43396e-05	0.00024815	-0.000111035	-0.000127637	0.000433823	0.000220107	-2.23432e-05	-0.000280767	1.58501e-05	6.51377e-05	-0.000173032	-0.000233438	5.9904e-05	0.000203173	0.000119748	0.000271874	0.000173539	0.000198025	-7.64099e-05	5.98633e-05	0.000101264	0.00016213	6.52443e-05	-0.000138151	-5.29753e-05	-0.000223056	0.000215894	0.000529101	9.5467e-06	1.5169e-05	-0.00018904	-0.000471455	-4.18718e-05	-0.000213202	-4.06786e-05	-0.000262814	6.08986e-06	9.63737e-06	-5.85247e-05	-0.000105378	1.83678e-05	0.000171684	8.47897e-05	0.000200325	3.80463e-06	2.13262e-05
imperfectSUR_mean	_cons	-0.000276989	-9.23172e-05	0.00024641	0.000705131	0.000242958	-5.90881e-05	9.90921e-05	-5.30619e-05	0.00079279	0.000443422	-0.00016982	-0.000709319	0.000233314	0.00064319	-0.000661481	-0.00131136	-6.43628e-05	-0.000143751	-0.000154093	0.000360676	-9.29159e-05	-0.000209687	-0.000464887	-0.000167285	-0.000228071	-0.0004078	-0.000211134	-2.47698e-05	0.000143987	0.000916723	0.000763494	0.000400838	-0.000409304	-0.000887486	-5.12574e-05	-0.000140361	0.00021108	0.000273816	-0.000142214	-0.000175225	3.91155e-05	0.000113343	7.99752e-05	9.07843e-05	-0.000218532	-0.000278815	-1.86324e-06	7.15219e-05
imperfectSUR_lnvar	_cons	-0.00128312	-0.00154123	-0.000432551	0.000875262	-0.000848391	-7.82146e-05	-0.0073173	0.000384487	-0.00596153	-0.00835862	-0.000813413	-0.00348331	-0.00189144	3.87064e-05	0.000715585	-0.00116152	0.00216175	0.00288764	-0.000440429	0.00218033	0.00103404	0.000832573	0.000504321	-0.00105484	0.00176912	0.00106089	0.00148717	8.20903e-05	0.00248565	-0.000559474	-0.000103589	-0.000976401	-0.00272475	-0.00419472	0.00172292	0.00215425	-0.000174914	-0.00156385	0.00016225	-0.000846376	0.00114866	0.00237085	-0.000280097	0.00117935	0.000875976	0.00186128	-0.000344246	4.45803e-05
[truncated: 94 more columns]
